# Supplementary material for: Construction and validation of a nomogram model to predict the poor prognosis in patients with pulmonary cryptococcosis
Source: PeerJ. 2024 Mar 11;12:e17030. doi: 10.7717/peerj.17030 (PMC10939030; doi:10.7717/peerj.17030)
Supplement: Data S1 [file peerj-12-17030-s002.xls]

## Sheet: Sheet1
No													symptom								Imaging changes			Comorbidities (diseases)						Whether or not combined with HIV		Laboratory tests		meningeal infection		hormone therapy		Use of immunosuppressive drugs		cytotoxic drug		Cerebrospinal fluid test					Laboratory indicators (blood counts)
	bed number	gender	Age	CP	Admission diagnosis	Discharge diagnosis	Ward	Admission time	Discharge time	Hospitalization days	BMI	time of onset	fever	headache	hyperspasmia	nausea/vomiting	cough	shortness of breath	mental symptoms	Asymptomatic/Other	No lesion	Localized	diffuse	diabetes	tuberculosis	malignancy	hematologic malignancy	organ transplant	other	Yes	No	CD4+T	capsular antigen	Yes	No	Yes	No	Yes	No	Yes	No	Is ink staining positive	Cerebrospinal Fluid Pressure	Number of nucleated cells in cerebrospinal fluid	glucose	chlorine	white blood cell count	neutrophils（%）	lymphocytes（%）
1	1	male	25		1.cryptococcus neoformans meningitis	1.cryptococcus neoformans meningitis	Infection ward(6A-6)	2008-08-01	2008-08-30	29		2 weeks	1	1		1						1									1			1			1										7.1	0.637
2	26	female	52		1.Headache to be investigated 2. Cryptococcal encephalitis	1.cryptococcal meningitis	Infection ward(6A-12)	2008-10-02	2008-10-09	7		50+ days	1	1		1						1									1			1			1										9.2	0.774
3	7	male	37		1.Cryptococcal meningoencephalitis	1.Cryptococcal meningoencephalitis	Infection ward(6A-7)	2008-12-31	2009-02-04	35		12 days		1		1						1		1							1			1			1										10.8	0.815
4	55	male	66		1.Unclear awareness, cause to be investigated： 2.After endoscopic sinus surgery 3.Tuberculous meningitis?	1.cryptococcal meningitis2.After endoscopic sinus surgery3.hypokalemia	Infection ward(6A-9)	2009-02-04	2009-05-19	104		1months+		1	1	1															1			1			1
5		male	62		1.fever of unknown origin nasosinusitis？Central system infection？	1.cryptococcus neoformans meningitis	Infection ward(6A-9)	2009-03-25	2009-04-16	22
6		male	56		1.cryptococcal meningitis 2.viral hepatitis B	1.cryptococcal meningitis2.viral hepatitis B	Infection ward(6A-9)	2009-04-10		38或33
7	15	male	54		1. cryptococcal meningitis 2.Cryptococcal pneumonia 3. Alcoholic liver disease...	1. cryptococcal meningitis 2.Cryptococcal pneumonia 3. Alcoholic liver disease 4.Hepatic cyst5...	Infection ward(6A-7)	2009-04-13	2009-05-11	28		20 days	1	1								1									1			1													8.11	0.701
8	25	female	74		1.cryptococcal meningitis	1.cryptococcal meningitis2.posthepatic cirrhosis（Hepatitis C）3.type 2 diabetes4.Paroxysmal atrial fibrillation...	Infection ward(6A-6)	2009-04-20	2009-05-18	28		2 weeks		1		1								1							1			1			1										8.31	0.876
9	15	male	54		1.cryptococcal meningitis 2.Cryptococcal pneumonia 3.Alcoholic liver disease 4....	1.cryptococcal meningitis2.Cryptococcal pneumonia3.Alcoholic liver disease 4.Hepatic cyst 5.drug-induced...	Infection ward(6A-7)	2009-05-11	2009-06-08	28
10	1	male	45		1.Right upper lung mass	1.Granulomatous inflammation of the upper right lung(Cryptococcus)	Cardiothoracic Surgery Ward(5-4)	2009-06-22	2009-07-09	17		half months										1													1
11	5	female	50		1.cryptococcal meningitis	1.cryptococcal meningitis2.hypertension 3.diabetes4.hemolytic anemia 5.Idiopathic platelet...	Infection ward(6A-6)	2009-06-25	2009-06-29	4		10+ days		1										1					idiopathic thrombocytopenic purpura		1			1			1										15.1	0.96
13	13	female	54		1.Central infection bacterial？viral？fungous？	1.Cryptococcal sepsis2.cryptococcal meningitis3.drug eruption	Infection ward(6A-9)	2009-07-24	2009-11-04	103		10+ days	1	1																	1			1			1										7.2	0.897	0.064
14	-7	female	46		1.Left upper pulmonary nodule 2.Right thyroid nodule 3.Left renal cyst 4.Uterine...	1.Pulmonary cryptococcal infection2.gallstone	Infection ward(6A-12)	2009-07-29	2009-09-08	41		half months										1									1				1		1										4.9	0.61
15	27	male	21		1.intracranial infection cryptococcal meningitis	1.cryptococcal meningitis2.nerve deafness	Infection ward(6A-8)	2009-08-02	2009-08-05	3		2months		1		1					1										1			1			1										14.6	0.885	0.06
16(Incomplete information)	35	female	38			1.cryptococcal meningitis	Infection ward(6A-6)	2009-08-10	2009-09-01	22
17(After 6 months of hospitalization in an external hospital)	36	female	26		1.cryptococcal meningitis 2.pulmonary mycosis 3.tuberculous lymphadenitis 4.viral...	1.cryptococcal meningitis2.pulmonary mycosis3.tuberculous lymphadenitis 4.Chronic viral hepatitis B	Infection ward(6A-9)	2009-08-20	2009-09-21	32
18	11	female	43		1.Pulmonary cryptococcosis 2.Secondary pulmonary tuberculosis smear positive initial treatment 3.systemic lupus...	1.Secondary infiltrating pulmonary tuberculosis（Bipulmonary），smear positive，initial treatment，Remission 4.Cryptococcal pneumonia5...	Respiratory Internal Medicine Ward(2-16)	2009-09-15	2009-09-29	14		3months	1				1						1		1				SLE		1				1	1											2.8	0.732
Incomplete information19	59	female	52		1.left Pulmonary cryptococcosis 2.rheumatoid arthritis Associated interstitial pneumonia	1.AECOPD 2.left Pulmonary cryptococcosis 3.rheumatoid arthritis	Respiratory Internal Medicine Ward(2-16)	2009-09-16	2009-10-26	40
20	5	male	17		1.Cryptococcal pneumonia	1.Cryptococcal pneumonia	Respiratory Internal Medicine Ward(2-14)	2009-09-18	2009-09-29	11		1months						1				1									1				1		1										6.2	0.518	0.285
21	27	male	40		1.fever of unknown origin：pulmonary tuberculosis？ pneumonia？meningitis？	2.cryptococcal meningitis3.pulmonary tuberculosis？6.viral hepatitis，Hepatitis B，Chronic mild7.lung cancer待...	Infection ward(6A-6)	2009-10-07	2009-11-09	33		1 weeks	1	1								1		1							1			1			1										4.2	0.584
22	12	male	61		1.fever of unknown origin： infection ？	1.central nervous system infection2. new type Cryptococcus	Infection ward(6A-11)	2009-10-14	2009-11-06	23		10 days	1								1										1			1			1										21.3	0.206	0.724
23	1	female	13		1.systemic lupus erythematosus	1.cryptococcal meningitis2.systemic lupus erythematosus3. Lupus nephritis（crescentic glomerulonephritis...	Infection ward(6A-6)	2009-10-14	2009-11-17	34		1 days		1		1					1								SLE		1			1		1											17.3	0.603
24	3	male	51	complete	1.Central infection：cryptococcal meningitis 2.Tuberculous meningitis Wait to confirm	1.cryptococcal meningitis2.chronic hepatitis B	Infection ward(6A-11)	2009-10-19	2010-01-22	95		3months	1	1			1					1									1			1			1										7.8	0.71	0.2
25(Incomplete information and unclear diagnosis)	11	male	54		1.BipulmonaryDiffuse lesion：PAP？PCP？BAC？lymphoma？ Pulmonary sarcoidosis...	1.Multiple lymph node enlargement throughout the body with multiple lung lesions：cryptococcosis Consider first，tuberculosis、lymphoma...	Respiratory Internal Medicine Ward(2-16)	2009-10-28	2009-11-06	9
27	39	female	50		1.Shadow of right lower lung mass to be investigated： chronic inflammation Consider first 2. Multiple cysts of the liver 3....	1.Cryptococcal pneumonia2. Multiple cysts of the liver3.hypertension level 2	Respiratory Internal Medicine Ward(2-16)	2009-11-02	2009-11-16	14		1monthshalf					1					1									1				1												4.5	0.519
28	13	male	31		1.ilateral pulmonary nodules yet to be investigated：tumor？ fungal infection ？tuberculosis？	1.Bilateral Cryptococcal pneumonia2.Right lower chest anterior soft tissue infection（MRSA)	Respiratory Internal Medicine Ward(2-14)	2009-11-03	2009-12-15	42		1months					1						1		1						1				1		1										12.1	0.764	0.15
29(Diagnosis not clear)	12	male	26		1.Bilateral lung mass： inflammation Consider first，tumor、tuberculosis cannot exclude	1.Multiple lesions in both lungs： pneumonia Consider first，tuberculosis、Cryptococcal cannot exclude	Respiratory Internal Medicine Ward(2-16)	2009-11-05	2009-11-16	11
30	2	female	53		1.cryptococcus neoformans meningitis	1.cryptococcus neoformans meningitis	Infection ward(6A-6)	2009-11-13	2009-11-28	15		2 weeks	1	1		1						1									1			1			1										6.3	0.728
31	36	female	54		1.cryptococcal meningitis 2.Gallstone with cholecystitis	1.cryptococcal meningitis2.Gallstone with cholecystitis	Infection ward(6A-9)	2009-11-17	2009-12-15	28
32	8	male	33		1.cryptococcosis 2.Hepatitis B cirrhosis After splenectomy	1.Cryptococcal encephalitis2.Hepatitis B cirrhosis，Decompensation，After splenectomy	Infection ward(6A-12)	2009-11-24	2010-03-15	111		3months	1	1								1							hepatitis Bcirrhosis		1			1			1										10.4	0.754
33	10	male	38		1.cryptococcal meningitis 2.pulmonary infection？ 3.Nodular erythema	1.cryptococcal meningitis2.pulmonary infection3.Nodular erythema	Infection ward(6A-11)	2009-11-26	2010-01-12	47		20 days	1	1		1							1								1			1			1										3.1	0.903	0.08
34	23	male	35		1.central nervous system infection：cryptococcal meningitis？ 2.pulmonary infection	1.cryptococcal meningitis2.Cryptococcal pneumonia？	Infection ward(6A-9)	2009-11-28	2009-12-18	20		3months	1	1		1						1			1						1		1	1			1										8.7	0.675	0.224
35	13	male	44		1.intracranial infection：meningitis？Tuberculous meningitis？ 2.Hepatitis B cirrhosisDecompensation	1.cryptococcal meningitis2.viral hepatitis hepatitis Bcirrhosis（Decompensation）3.继发...	Infection ward(6A-12)	2009-11-30	2010-01-25	56		1months	1	1			1							1					hepatitis B hha		1			1			1										2.3	0.735	0.204
36	-2	male	57		1.fungous pneumonia（cryptococcosis） 2. drug-induced hepatitis 3.type 2 diabetes...	1.fungous pneumonia（cryptococcosis）2. drug-induced hepatitis3.type 2 diabetes	Respiratory Internal Medicine Ward(2-14)	2009-12-04	2010-01-14	41		2months					1						1	1							1		1		1		1										6.7	0.475	0.409
Diagnosis not clear37	10	female	57		1.Multiple lesions in both lungs：lung cancer？cryptococcosis？allergic pneumonia？	1.Multiple lesions in both lungs：cryptococcosis？lung cancer？allergic pneumonia？	Respiratory Internal Medicine Ward(10-2)	2009-12-14	2009-12-18	4
38	36	female	21		1.central nervous system infection	1.acute cryptococcal meningoencephalitis	Infection ward(6A-6)	2009-12-28	2009-12-30	2		10+ days	1	1																	1			1			1										8.4	0.806	0.127
39	22	male	36		1.cryptococcal meningitis 2.Cryptococcal pneumonia？	1.cryptococcal meningitis2.Cryptococcal pneumonia？	Infection ward(6A-9)	2009-12-28	2009-12-30	2
40	31	female	38		1.parathyroid adenoma	1.Granulomatous inflammation of the left lung（cryptococcosis）2.Left thyroid adenoma	Cardiothoracic Surgery Ward(5-4)	2010-01-11	2010-02-02	22
41	10	male	39	complete	1.cryptococcal meningitis 2.pulmonary infection 3.Nodular erythema	1.cryptococcal meningitis 2.pulmonary infection3.Nodular erythema4.deep venous thrombosis	Infection ward(6A-11)	2010-01-12	2010-03-13	60
42	-2	male	58		1.Pulmonary fungal infection（cryptococcosis） 2.type 2 diabetes	1.Pulmonary fungal infection（cryptococcosis）2.type 2 diabetes	Respiratory Internal Medicine Ward(2-14)	2010-01-14	2010-02-26	43
43	17	female	59	complete	1.fever of unknown origin upper respiratory tract infection？Sepsis？H1N1 influenza A（Mild symptoms）...	1.cryptococcal meningitis2.systemic lupus erythematosus3. pneumonia4.Compression fracture of thoracic vertebrae（T12...	Infection ward(6A-10)	2010-01-15	2010-03-09	53		10+ days	1	1								1							SLE		1			1		1											10.5	0.554
44	1	female	35		1.Left lower lung lesion yet to be investigated：Cryptococcal pneumonia？	1.left Cryptococcal pneumonia	Respiratory Internal Medicine Ward(10-2)	2010-01-21	2010-02-01	11
45	23	male	52		1.Central infection：cryptococcal meningitis	1.cryptococcal meningitis 2.Right epididymitis 3.viral hepatitis B4. drug-induced hepatitis5....	Infection ward(6A-11)	2010-01-25	2010-06-21	147
46	51	male	61		1.The nature of multiple nodules in the left lung remains to be investigated cryptococcosis？tumor？	1.The nature of multiple nodules in the left lung remains to be investigated cryptococcosis？tuberculosis？2.hypertension 3.type 2 diabetes...	Respiratory Internal Medicine Ward(2-14)	2010-02-05	2010-02-12	7		1months										1		1							1				1		1										5.7	0.563
47	27	male	61		1.left lung cryptococcosis 2.hypertension 3.type 2 diabetes	1.left lung cryptococcosis 2.hypertension 3.type 2 diabetes	Respiratory Internal Medicine Ward(2-14)	2010-02-23	2010-03-08	13
48	-2	male	58		1.Pulmonary fungal infection（cryptococcosis） 2.type 2 diabetes	1.Pulmonary fungal infection（cryptococcosis） 2.type 2 diabetes	Respiratory Internal Medicine Ward(2-14)	2010-02-26	2010-03-23	25
Diagnosis not clear49	25	male	40		1.Right upper lung mass：tuberculosis？	1.Cavernous lesion in the upper right lung to be investigated：1、tuberculosis？2、 Cryptococcus	Respiratory Internal Medicine Ward(2-16)	2010-03-02	2010-03-08	6
50	37	male	47	complete	1.cryptococcal meningitis 2.Nodular prurigo	1.cryptococcal meningitis2.Nodular prurigo3. Cranial hypertension cerebral hernia？	Infection ward(6A-10)	2010-03-08	2010-03-09	1		1months		1															Nodular prurigo					1		1
51	28	female	31	complete	1.After hepatitis B cirrhosis Decompensation 2.fever of unknown origin：viral encephalitis？	1.cryptococcal meningitis2.After hepatitis B cirrhosis Decompensation3.pulmonary infection	Infection ward(6A-11)	2010-03-14	2010-05-20	67		half months	1	1			1						1						hepatitis BcirrhosisDecompensation		1			1			1										2.4	0.702
52	53	male	34		1.Cryptococcal encephalitis 2.Hepatitis B cirrhosis Decompensation3.After splenectomy ...	1.Cryptococcal encephalitis 2.Hepatitis B cirrhosis3.After splenectomy	Infection ward(6A-11)	2010-03-15	2010-04-28	44
53	16	male	37		1.cryptococcal meningitis 2.type 2 diabetes 3.fatty liver	1.cryptococcal meningitis2.type 2 diabetes3.fatty liver4.Hepatic small hemangioma	Infection ward(6A-7)	2010-03-17	2010-03-29	12
54	12	female	36	complete	1.central nervous system infection：cryptococcal meningitis？ 2. lymph nodecryptococcosis...	3.AIDS combine Disseminated cryptococcal infection4.cryptococcal meningitis5.Allergic dermatitis6.梅...	Infection ward(9-3)	2010-03-19	2010-05-04	46		1months+		1		1							1							1				1			1										3.7	0.883	0.046
55	B5	female	64		1.cryptococcal meningitis 2.systemic lupus erythematosus 3.interstitial pneumonia 4....	1.cryptococcal meningitis2.systemic lupus erythematosus3.interstitial pneumonia4.osteoporosis5.胸...	ICU ward(5-3)	2010-03-23	2010-04-12	20		2months	1	1									1						SLE		1			1		1											10.2	0.864
56	-2	male	58		1.Pulmonary fungal infection（cryptococcosis） 2.type 2 diabetes	1.Pulmonary fungal infection（cryptococcosis）2.type 2 diabetes	Respiratory Internal Medicine Ward(2-14)	2010-03-23	2010-04-21	29
Diagnosis not clear57	17	male	59		1.Bilateral lung lesions： fungal infection ？tumor？tuberculosis？	1.Bilateral lung lesions： fungus （cryptococcosis High possibility）？tumor？tuberculosis？	Respiratory Internal Medicine Ward(10-2)	2010-03-26	2010-04-01	6
58	27	female	58	complete	1.Headache to be investigated：Tuberculous meningitis？meningitis？fungous encephalitis？	1.cryptococcal meningitis2. herpes zoster3. drug-induced hepatitis	Infection ward(6A-11)	2010-04-02	2010-07-12	101		2months	1	1								1									1			1			1										3.8
59	33	female	57		1.Pulmonary cryptococcosis	1.Pulmonary cryptococcosis	Respiratory Internal Medicine Ward(2-14)	2010-04-12	2010-04-14	2		2months					1					1									1				1		1
60	33	male	33		1.Central infection：viralmeningitis Consider first	1.central nervous system infection:cryptococcal meningitis Consider first,Tuberculous meningitis cannot exclude	Infection ward(6A-10)	2010-04-13	2010-04-14	1		1 weeks	1	1		1															1			1			1
61	23	male	63		1.Reasons for abnormal liver function to be investigated 2.hypertension	1.Autoimmune Liver Disease？2.Pulmonary cryptococcosis3.coxsackie virus infection4.hypertension 5.肝...	Infection ward(6A-6)	2010-04-19	2010-07-16	88		2months										1							autoimmune hepatopathy		1				1		1
62	-2	male	58		1.Pulmonary fungal infection（cryptococcosis） 2.II type diabetes	1.Pulmonary fungal infection（cryptococcosis） 2.II type diabetes	Respiratory Internal Medicine Ward(2-14)	2010-04-21	2010-05-27	36
63	29	female	31		1.Cryptococcal pneumonia	1.Cryptococcal pneumonia	Respiratory Internal Medicine Ward(10-2)	2010-04-23	2010-05-05	12		2months										1									1				1		1										3.3
64	8	female	26	complete	1.cryptococcosis（Cryptococcal pneumonia cryptococcal meningitis）	1.cryptococcosis（Cryptococcal pneumonia cryptococcal meningitis）2.Cholecystitis with gallbladder sediment like stones	Infection ward(6A-9)	2010-04-23	2010-07-12	80		1months	1	1								1									1			1			1										5.6	0.799
65	53	male	34		1.Cryptococcal encephalitis 2.Hepatitis B cirrhosis（Decompensation） 3.After splenectomy...	1.Cryptococcal encephalitis2.Hepatitis B cirrhosis（Decompensation）3.After splenectomy	Infection ward(6A-11)	2010-04-28	2010-06-11	44		15 days	1	1								1									1			1			1
66	7	male	27	complete	1.cryptococcal meningitis 2.pulmonary infection（ cryptococcal ？）	1.cryptococcal meningitis2.右下 pneumonia	Infection ward(6A-10)	2010-05-13	2010-06-30	48		20 days					1						1								1				1		1										5.1	0.55	0.359
67	53	male	38		1.两下肺infectious病灶 yet to be investigated 2.pulmonary tuberculosis？ 3.Pulmonary fungal infection？ 4...	1.两下Pulmonary cryptococcosis	Respiratory Internal Medicine Ward(2-16)	2010-05-19	2010-06-09	21		20 days		1		1							1						polymyositis		1			1		1											17.1	0.888	0.071
68	38	female	39		1.cryptococcal meningitis 2. polymyositis 3. glaucoma 白内障	1.肺纤维化伴pulmonary infection2.cryptococcal meningitis3. polymyositis 4. glaucoma 白内障...	Infection ward(6A-10)	2010-05-21	2010-07-12	52		1months+	1	1								1												1			1										8.9	0.762
69	5	male	47	complete	1.Central infection cryptococcal meningitis	1.cryptococcal meningitis	Infection ward(6A-8)	2010-05-26	2010-08-18	84		1months					1						1								1				1		1										8.2	0.737
70	-2	male	58		1.肺cryptococcosis 2.type 2 diabetes	1.肺cryptococcosis2.type 2 diabetes	Respiratory Internal Medicine Ward(2-14)	2010-05-27	2010-06-23	27
71	5	female	36	complete	1.获得性免疫缺陷综合征 2.cryptococcal meningitis 3.继发性癫痫...	2.Cryptococcal encephalitis3.IRIS4.Lungstumor probable	Infection ward(9-3)	2010-05-30	2010-07-14	45
72	17	male	61		1.两下肺病灶 yet to be investigated： pneumonia？tuberculosis？tumor？	1.Pulmonary cryptococcosis	Respiratory Internal Medicine Ward(10-2)	2010-06-02	2010-06-17	15		1months	1	1									1								1			1			1										9.4	0.754	0.182
73	37	male	62			1.Cryptococcal encephalitis2.pulmonary infection3.多发性腔隙性 cerebral infarction 4.胆囊切除 postoperative	Infection ward(6A-10)	2010-06-05	2010-09-15	102		10+ days		1		1						1			1				allergic purpura		1			1		1											4.6	0.759
74	32	male	48			1.Cryptococcal encephalitis2.脑积水	Neurosurgery ward(5-9)	2010-06-15	2010-09-16	93		6 days										1							hepatitis B Virus carrying		1				1		1										8.9	0.582
75	56	male	50		1.右下肺多发 node yet to be investigated：tumor?tuberculosis？ fungal infection ？ 2.hypertension ...	1.右下Pulmonary cryptococcosis2.hypertension 3.心房颤动4.hepatitis B Virus carrying 状态	Respiratory Internal Medicine Ward(2-14)	2010-06-17	2010-07-08	21		10 days	1									1						1	Excision and fistulation of intestinal necrosis postoperative		1				1	1											4.9	0.903	0.065
76	5	female	57		1.双下肢肿胀 yet to be investigated：双下肢淋巴管炎？蜂窝织炎？ 2.右renal transplant...	1.Cryptococcal sepsis3.右renal transplant postoperative 4.hypertension 5.高脂血症6.肠坏死切...	Infection ward(6A-10)	2010-06-18	2010-07-13	25		10 days					1					1									1				1		1										6.2	0.757
77	12	female	38		1.右肺病灶 yet to be investigated： inflammation ？tuberculosis？tumor？	1.右肺Cryptococcal pneumonia巨块 type	Respiratory Internal Medicine Ward(2-14)	2010-06-25	2010-07-16	21		half months	1	1		1					1										1			1			1										9	0.826	0.114
78	6	male	62	complete		1.cryptococcal meningitis2. cerebral infarction	Infection ward(6A-9)	2010-06-28	2010-09-10	74		3months								1		1				1					1		1			1											10.2	0.81
79	39	male	61		1.右下肺占位，lung cancer？	1.右下Pulmonary cryptococcosis	Cardiothoracic Surgery Ward(5-4)	2010-06-29	2010-07-16	17
80	8	male	27		1.cryptococcal meningitis	1.cryptococcal meningitis	Infection ward(6A-10)	2010-07-02	2010-07-23	21
81	-2	male	50		1.右下Pulmonary cryptococcosis 2.hypertension 3.心房颤动 4.hepatitis B病...	1.右下Pulmonary cryptococcosis 2.hypertension 3.心房颤动4.hepatitis B Virus carrying 状态	Respiratory Internal Medicine Ward(2-14)	2010-07-08	2010-08-10	33
82	32	female	41		1.皮质醇增多症 2.hypokalemia 3.肝内胆管囊肿	1.皮质醇增多症：纵隔神经内分泌癌切除 postoperative 3.Pulmonary cryptococcosis4.肝内胆管囊...	Respiratory Internal Medicine Ward(2-14)	2010-07-09	2010-08-24	46		3months								1			1						sarcoidosis		1				1	1											7.6	0.822	0.136
83	3	female	26	complete	1.cryptococcosis（Cryptococcal pneumonia cryptococcal meningitis） 2.胆囊炎伴...	1.cryptococcosis（Cryptococcal pneumonia cryptococcal meningitis）2.胆囊炎伴胆囊泥沙样结石	Infection ward(6A-9)	2010-07-12	2010-08-27	46
84	38	female	54		1.右下Pulmonary nodule yet to be investigated：tumor？ infection ？	1.右下Pulmonary nodule yet to be investigated： chronic 性 pneumonia Consider first，cryptococcosis？tumor cannot exclude	Respiratory Internal Medicine Ward(2-16)	2010-07-15	2010-08-06	22
85	13	male	34		1.Cryptococcal encephalitis 2.Hepatitis B cirrhosis（Decompensation） 3.After splenectomy...	1.Cryptococcal encephalitis2.Hepatitis B cirrhosis（Decompensation）3.After splenectomy	Infection ward(6A-12)	2010-07-19	2010-07-20	1
86	16	male	60		1.右Pulmonary nodule yet to be investigated 2.肝炎cirrhosisDecompensation After splenectomy	1. Cryptococcus consider 2.肝炎cirrhosisDecompensation After splenectomy	General Thoracic Surgery Ward(5-5)	2010-07-23	2010-08-05	13
87	35	female	56		1.Cryptococcal pneumonia 2. node 病？	1.Cryptococcal pneumonia2. node 病？	Respiratory Internal Medicine Ward(2-16)	2010-07-27	2010-07-29	2		half months								1		1									1				1		1										5.1	0.551
88 Diagnosis not clear	25	male	57		1.左肺多发性病灶： fungal infection ？tumor？tuberculosis infection ？	1.左肺多发性病灶：Cryptococcal Consider first	Respiratory Internal Medicine Ward(10-2)	2010-07-27	2010-07-30	3		20 days							1			1									1			1			1										9.2	0.818
89	20	male	27		1.cryptococcal meningitis 2.upper respiratory tract infection？	1.cryptococcal meningitis	Infection ward(6A-12)	2010-07-30	2010-08-31	32
90	1	female	14		1.fever of unknown origin：pulmonary infection？血液系统恶性tumor？Sepsis？ 2.溶血...	1.cryptococcal meningitis2.cerebral hernia3.继发性癫痫4.hemolytic anemia5.右肺中叶 infection 6...	ICU ward(5-3)	2010-08-02	2010-08-25	23
91	22	male	53		1.Intracranial space occupying lesions，转移性tumor consider ， inflammation 性病变 Wait to confirm	1.颅内cryptococcosis2.右肺下叶cryptococcosis3.继发pulmonary infection4.左下肺不张...	Neurosurgery ward(5-8A)	2010-08-04	2010-09-23	50
92Diagnosis not clear	35	male	25		1.右下 pneumonia？	1.右下肺病灶：Cryptococcal pneumonia Consider first，tuberculosis Wait to confirm	Respiratory Internal Medicine Ward(2-16)	2010-08-06	2010-08-18	12		13 days	1				1					1						1			1			1		1											4.2	0.865
93	-2	male	50		1.右下Pulmonary cryptococcosis 2.hypertension 3.心房颤动 4.hepatitis B病毒...	1.右下Pulmonary cryptococcosis 2.hypertension 3.心房颤动 4.hepatitis B Virus carrying 状态 ...	Respiratory Internal Medicine Ward(2-14)	2010-08-10	2010-08-31	21
94	8	male	43	complete	1.右下肺团块： infection Consider first 2. Renal transplant failure	1.Cryptococcal pneumonia2.cryptococcal meningitis3. Renal transplant failure	Infection ward(6A-9)	2010-08-11	2010-09-09	29
95	5	male	47	complete	1.cryptococcal meningitis	1.cryptococcal meningitis	Infection ward(6A-8)	2010-08-18	2010-09-15	28
96	32	female	41		1.皮质醇增多症 纵隔神经内分泌癌切除 postoperative 2.Pulmonary cryptococcosis ...	1.皮质醇增多症 纵隔神经内分泌癌切除 postoperative 2.Pulmonary cryptococcosis 3.肾上腺...	Respiratory Internal Medicine Ward(2-14)	2010-08-24	2010-09-06	13
97Diagnosis not clear	5	male	45		1.type 2 diabetes	1.type 2 diabetes 2.Lungs炎性病变 yet to be investigated（cryptococcosis？）3.diabetes周围神经病...	Endocrine ward(2-17)	2010-08-24	2010-08-31	7		10+ days					1						1								1				1		1
98	37	male	37		1.cryptococcal meningitis	1.cryptococcal meningitis	Infection ward(6A-9)	2010-08-25	2010-08-26	1
99	-2	male	50		1.右下Pulmonary cryptococcosis 2.hypertension 3.心房颤动 4.hepatitis B病毒...	1.右下Pulmonary cryptococcosis 2.hypertension 3.心房颤动 4.hepatitis B Virus carrying 状态	Respiratory Internal Medicine Ward(2-14)	2010-08-31	2010-09-28	28
100	28	female	47		1.Lungs肿块 yet to be investigated：炎性？tumor？	1.Lungs多发病灶 yet to be investigated2.肺cryptococcosis Consider first3.pulmonary tuberculosis？	Respiratory Internal Medicine Ward(2-16)	2010-09-01	2010-09-03	2
101Diagnosis not clear	7	male	56		1.两肺多发 node 性质待定：tuberculosis？ Cryptococcus lung cancer？ 2.右手骨折...	1.两肺多发 node 性质待定：tuberculosis？ Cryptococcus lung cancer？2.右手骨折 postoperative	Respiratory Internal Medicine Ward(2-16)	2010-09-02	2010-09-03	1		1months+	1	1							1												1	1			1					0	190	60	3.2	124	8.1	0.805
102	18	male	45	complete	1.cryptococcal meningitis	1.cryptococcal meningitis	Infection ward(6A-8)	2010-09-06	2010-10-25	49
103	31	female	47		1.Cryptococcal pneumonia	1.Cryptococcal pneumonia	Respiratory Internal Medicine Ward(2-16)	2010-09-13	2010-09-27	14
Diagnosis not clear104	9	female	48		1.左下Pulmonary nodule：tuberculosis？tumor？	1.左下Pulmonary nodule：Pulmonary cryptococcosis Consider first2.疑病症？	Respiratory Internal Medicine Ward(2-16)	2010-09-15	2010-10-01	16		8months		1					1												1			1			1										4.5	0.791
105	13	female	44		1.cryptococcal meningitis	1.Cryptococcal encephalitis	Infection ward(6A-9)	2010-09-20	2010-09-26	6		10 days	1										1					1			1				1	1											3.72	0.695
106	10	male	27		1.cryptococcal meningitis	1.cryptococcal meningitis 2.Drug induced liver damage	Infection ward(6A-12)	2010-09-20	2010-10-08	18
107	33	male	50	complete	1.fever of unknown origin：infectious？drug-induced？neoplastic？	1.cryptococcal meningitis	Infection ward(6A-11)	2010-09-21	2010-10-15	24		2months	1	1								1							Alcoholic hepatopathy		1			1			1										15.8	0.952	0.04
108	15	male	42		1.Central infection：meningitis？Tuberculous meningitis？ 2.Alcoholic liver disease	1.cryptococcal meningitis2.Alcoholic liver disease	Infection ward(6A-10)	2010-09-23	2010-10-08	15		half months	1	1		1															1			1			1										6	0.691
109	31	male	40		1.左肺病变 yet to be investigated：pulmonary tuberculosis？Cryptococcal pneumonia？lung cancer？	1.左肺病变 yet to be investigated：pulmonary tuberculosis？Cryptococcal pneumonia？lung cancer？ 2.胆囊结石	Respiratory Internal Medicine Ward(2-16)	2010-09-27	2010-10-02	5
110	-2	male	50		1.右下Pulmonary cryptococcosis 2.hypertension 3.心房颤动 4.hepatitis B病毒...	1.右下Pulmonary cryptococcosis 2.hypertension 3.心房颤动 4.hepatitis B Virus carrying 状态 ...	Respiratory Internal Medicine Ward(2-14)	2010-09-28	2010-10-18	20
111	20	female	26	complete	1.cryptococcosis（Cryptococcal pneumonia cryptococcal meningitis）	1.cryptococcal meningitis2.pulmonary infection	Infection ward(6A-7)	2010-09-29	2010-10-26	27
112	1	male	67		1.fever of unknown origin Central infection？尿路 infection ？tumor？结缔组织病？ 2.肾...	1.Cryptococcal encephalitis2.肾结石 3.陈旧性脑腔隙性梗塞	Infection ward(6A-12)	2010-10-05	2010-10-28	23		1months		1							1										1			1			1					0	250	70	3.2	115	6.5
113	5	male	53		1.颅内及Pulmonary cryptococcal infection	1.颅内及Pulmonary cryptococcal infection	Neurosurgery ward(5-8A)	2010-10-06	2010-10-06	1
114	57	male	45		1.右Pulmonary nodule 性质 yet to be investigated	1.右中肺 chronic inflammation（cryptococcosis consider ）	Cardiothoracic Surgery Ward(5-4)	2010-10-08	2010-10-22	14
115	19	male	42	complete	1.cryptococcal meningitis 2.Alcoholic liver disease	1.cryptococcal meningitis 2.Alcoholic liver disease	Infection ward(6A-8)	2010-10-15	2010-11-15	31
116	-6	male	50		1.右下Pulmonary cryptococcosis 2.hypertension 3.阵发性心房颤动 4.乙...	1.右下Pulmonary cryptococcosis2.hypertension 3.阵发性心房颤动4.hepatitis B Virus carrying 状态...	Respiratory Internal Medicine Ward(2-14)	2010-10-18	2010-11-04	17
117	26	male	63	complete	1.cryptococcal meningitis Wait to confirm	1.cryptococcal meningitis2.Sepsis	Infection ward(6A-11)	2010-10-22	2011-02-10	111		10+ days	1				1						1						hepatitis B Virus carrying		1				1		1					0	135		4.6	128	10.6
118	55	female	65		1.Pulmonary cryptococcosis 2. chronic 性支气管炎 3.type 2 diabetes 4.hypertension...	1.左Pulmonary cryptococcosis？2. chronic 性支气管炎3.type 2 diabetes 4.hypertension 5.特发...	Respiratory Internal Medicine Ward(2-14)	2010-10-25	2010-10-29	4
119	9	female	44		1.两侧 pneumonia 2. chronic 性Hepatitis B肝炎	1.Pulmonary cryptococcosis2.hepatitis B Virus carrying 者	Respiratory Internal Medicine Ward(2-16)	2010-10-30	2010-11-17	18		1 year		1									1	1							1			1			1		0			0	55		4.8	119	7.9	0.878
120	16	female	35		1.肺cryptococcosis	1.肺cryptococcosis	General Thoracic Surgery Ward(5-5)	2010-11-03	2010-11-18	15
121	30	male	67	complete	1.cryptococcal meningitis	1.cryptococcal meningitis	Infection ward(6A-11)	2010-11-05	2010-11-30	25
122	19	female	26		1.颅内病变： cerebral infarction ？cryptococcal meningitis？脑脓肿？	1. cerebral infarction 2.Cryptococcal encephalitis	Infection ward(6A-11)	2010-11-06	2010-11-24	18
123	2	male	43		1.cryptococcal meningitis恢复 phase Cryptococcal pneumonia恢复 phase 2. Renal transplant failure	1.cryptococcal meningitis Cryptococcal pneumonia2. Renal transplant failure 血透维持 phase	Infection ward(6A-9)	2010-11-09	2010-11-10	1
124	15	male	73	complete	1.Tuberculous meningitis 2.type 2 diabetes 3.面部皮肤瘤	1.cryptococcal meningitis2.type 2 diabetes3.陈旧性Tuberculous meningitis4.皮脂腺毛囊鞘...	Infection ward(6A-12)	2010-11-10	2011-01-02	53		20 days		1		1					1										1			1			1		0			0	400	252	4.5	111	6.8	0.699	0.155
125	9	female	46		1.Lungs node ：Lungs fungus 病 consider 2.hypertension 3.抑郁症	1.两肺病变2.hypertension 3.抑郁症4.Lungs fungus 病 cryptococcosis consider 5....	Respiratory Internal Medicine Ward(2-14)	2010-11-11	2010-11-17	6
126	27	male	43		1.cryptococcal meningitis 2.Cryptococcal pneumonia 3. Renal transplant failure 4.血透维...	1.cryptococcal meningitis 2.Cryptococcal pneumonia3. Renal transplant failure 4.血透维持 phase	Infection ward(6A-11)	2010-11-15	2010-12-30	45
127	32	male	43		1.Bipulmonary占位原因 yet to be investigated：tumor？tuberculosis？cryptococcosis？	1.Bipulmonary占位原因 yet to be investigated：cryptococcosis Consider first	Respiratory Internal Medicine Ward(2-16)	2010-11-25	2010-12-01	6
128	13	female	56		1.Cryptococcal pneumonia 2. node 病？	1.右上肺病灶 yet to be investigated：Cryptococcal pneumonia Consider first2. node 病	Respiratory Internal Medicine Ward(2-16)	2010-11-26	2010-12-08	12
129	30	male	67	complete	1.cryptococcal meningitis	1.cryptococcal meningitis	Infection ward(6A-11)	2010-11-30	2010-12-30	30
130	23	male	46		1.cryptococcal meningitis	1.Cryptococcal meningoencephalitis	Infection ward(6A-8)	2010-11-30	2010-12-31	31
131	21	male	29	complete	1.cryptococcal meningitis	1.cryptococcal meningitis	Infection ward(6A-8)	2010-12-01	2011-01-02	32		1months	1	1		1							1						HIV，PCP	1				1			1		0			1			41.9		6.1	0.958	0.028
132	18	female	49		1.pulmonary mycosis Cryptococcus High possibility	1.pulmonary mycosis Cryptococcus High possibility 2.左乳腺内 node 灶	Respiratory Internal Medicine Ward(10-2)	2010-12-14	2010-12-28	14
133	58	female	56		1.右上Cryptococcal pneumonia 2.Allergic dermatitis 3. node 病 4.hypertension ...	1.右上Cryptococcal pneumonia2.Allergic dermatitis 3. node 病 4.hypertension	Respiratory Internal Medicine Ward(2-16)	2010-12-15	2010-12-30	15
134	22	male	50	complete	1.cryptococcal meningitis 2.pulmonary infection：fungous？ 3.renal transplant postoperative ...	1.重症 pneumonia2.多脏器功能衰竭3.renal transplant postoperative 4.cryptococcal meningitis 5.高...	Infection ward(6A-11)	2010-12-18	2011-01-15	28
135	2	male	38	complete	1. new type cryptococcal meningitis	1.AIDS2.cryptococcal meningitis3.耶氏肺孢子菌 pneumonia	Infection ward(9-3)	2010-12-18	2011-01-07	20		20 days		1								1								1				1			1		1			0	50	正常	1.4	119	2.8	0.77
136	11	male	42		1.Multiple lesions in both lungs yet to be investigated：肺泡细胞癌？ 2.hypertension	1.Multiple lesions in both lungs:Cryptococcal Consider first	Respiratory Internal Medicine Ward(2-16)	2010-12-23	2010-12-30	7
137	6	male	47		1.cryptococcal meningitis 2.pulmonary infection 3.腔隙性cerebral infarction 4.巨细...	1.AIDS2.cryptococcus neoformans meningitis3.pulmonary infection4.腔隙性cerebral infarction5.巨细...	Infection ward(9-3)	2010-12-23	2011-01-19	27		3months	1	1							1										1			1			1		1			0	250	260	0.6	116	11.9	0.897
138	7	male	47		1.central nervous system infection	1.cryptococcal meningitis	neurology ward(6B-23)	2010-12-27	2011-03-09	72		4months	1	1								1						1			1			1		1		1				0	110	170	3.3	123	7.6	0.808
139	58	female	56		1.右上Cryptococcal pneumonia 2.Allergic dermatitis 3. node 病 4.hypertension ...	1.右上Cryptococcal pneumonia2.Allergic dermatitis3. node 病4.hypertension	Respiratory Internal Medicine Ward(2-16)	2010-12-30	2011-01-05	6
140	30	male	67	complete	1.cryptococcal meningitis	1.cryptococcal meningitis 2.hypertension	Infection ward(6A-11)	2010-12-30	2011-02-18	50
141	27	male	43		1.cryptococcal meningitis 2.Cryptococcal pneumonia 3. Renal transplant failure 4.血透维...	1.cryptococcal meningitis2. Cryptococcus 脑 pneumonia3. Renal transplant failure 能 血透维持 phase 4.Lungs...	Infection ward(6A-11)	2010-12-30	2011-02-18	50		20 days	1	1			1					1									1			1			1		1			0	370	150	2.9	121	10	0.949	0.034
142	23	male	46	complete	1.Cryptococcal meningoencephalitis	1.cryptococcal meningitis2.hypokalemia	Infection ward(6A-8)	2010-12-31	2011-01-28	28
143	7	female	37		1.cryptococcal meningitis 2. pneumonia	1.cryptococcal meningitis2. pneumonia	Infection ward(6A-7)	2010-12-31	2011-02-21	52		3 days	1	1		1							1							1				1			1		1			0	370	12	2.3	112	3.2	59.5	27.2
144	-6	male	30	complete	1.cryptococcal meningitis	1.cryptococcal meningitis2.轻度 Liver function damage ：drug-induced可能3.hypokalemia	Infection ward(6A-8)	2011-01-02	2011-01-20	18
145	3	male	40	complete	1.AIDS 2. new type cryptococcal meningitis 3.尖锐湿疣 4.肺内感...	1.AIDS2. new type cryptococcal meningitis 3.肺内 infection 灶 Wait to confirm（Cryptococcal pneumonia？）4...	Infection ward(9-3)	2011-01-05	2011-03-12	66		23 days	1	1		1							1							1				1			1		1			0	＞450	2	2.75	109	2	72.6	17.6
146	29	male	41		1.右下肺fungous肉芽肿性炎：cryptococcosis Consider first	1.右下肺fungous肉芽肿性炎：cryptococcosis Consider first	Respiratory Internal Medicine Ward(10-2)	2011-01-10	2011-01-20	10
147	2	male	29	complete	1.cryptococcal meningitis 2.Cryptococcal pneumonia？	1.AIDS2.cryptococcus neoformans meningitis3.粟粒性pulmonary tuberculosis4.中枢...	Infection ward(9-3)	2011-01-11	2011-03-02	50		2months	1	1		1						1									1			1			1		1			0	＞400	220	1.9	116	5.9	84.4	10.5
148	8	female	43	complete	1.fever of unknown origin：1、Tuberculous meningitis？2、cryptococcal meningitis？ 3、淋...	1.cryptococcal meningitis	Infection ward(6A-7)	2011-01-11	2011-03-03	51		1months	1	1					1											1				1			1		1			0	400	2	2.9	128	6	83.7	10.7
149	19	female	25	complete	1.cryptococcus neoformans meningitis 2.pulmonary infection 3.systemic lupus erythematosus 4...	1.cryptococcus neoformans meningitis2.type 2 diabetes3.pulmonary tuberculosis （痰培养菌阳）4.系统...	Infection ward(9-4)	2011-01-12	2011-02-22	41
150	38	male	32	complete	1.Central infection：cryptococcal meningitis？viral encephalitis？Tuberculous meningitis？ 2...	1.cryptococcal meningitis2.HIV infection 状态（HIV阳性）?	Infection ward(6A-10)	2011-01-21	2011-01-24	3		13 days	1	1									1						Cranial cyst postoperative		1			1			1		1			0	130	270	0.9	119	8.6	90.3	8
151	29	female	57		1.右上Cryptococcal pneumonia 2. node 病 3.hypertension	1.fever of unknown origin：尿路 infection Consider first2.右上Cryptococcal pneumonia3. node 病 4.hypertension...	Respiratory Internal Medicine Ward(2-16)	2011-01-21	2011-01-28	7
152	17	female	41	complete	1.cryptococcal meningitis 2.颅脑占位 postoperative 3.hypokalemia	1.cryptococcal meningitis 2.颅脑占位 postoperative 3.hypokalemia 4.右侧肾上腺腺...	Infection ward(6A-7)	2011-01-24	2011-04-18	84		6 days	1				1					1									1				1		1		1								5.2	61.7	26
153	23	male	58		1.右下肺 community acquired pneumonia	2.Lungscryptococcosis	Infection ward(6A-12)	2011-01-25	2011-03-01	35		1months+					1					1									1				1		1		1			0	140	4	3	122	6.1	55.5	37
154	17	female	15		1.左下肺cryptococcosis。	1.左下肺cryptococcosis	Respiratory Internal Medicine Ward(10-2)	2011-01-27	2011-02-01	5		3months	1	1					1			1									1			1			1		1		1	0	＞450	18	0.4	105	10	88.2	7.2
155	8	male	62	complete	1.intracranial infection：tuberculosis Meninges encephalitis？viral encephalitis？Cryptococcal encephalitis？	1.cryptococcal meningitis2. Venous thrombosis	Infection ward(6A-10)	2011-02-02	2011-04-20	77		1 weeks		1		1							1								1
156	26	male	64	complete	1.cryptococcal meningitis	1.cryptococcal meningitis	Infection ward(6A-11)	2011-02-10	2011-02-26	16
157	21	male	32	complete	2.Headache to be investigated：cryptococcosis？	1.cryptococcal meningitis2.Right lower lobe infection3. herpes zoster4.hypokalemia	Infection ward(6A-6)	2011-02-10	2011-04-18	67
158	22	male	73	complete	1.cryptococcal meningitis 2.Prostatic hyperplasia	1.cryptococcal meningitis2.Prostatic hyperplasia 3.drug eruption	Infection ward(6A-7)	2011-02-17	2011-03-30	41
159	27	male	44		1.cryptococcal meningitis 2.Cryptococcal pneumonia 3. Renal transplant failure 能 血透维持...	1.cryptococcal meningitis 2.Cryptococcal pneumonia 3. Renal transplant failure 能 血透维持 phase 4.肺...	Infection ward(6A-11)	2011-02-18	2011-04-12	53
160	28	female	56		1.fever of unknown origin：Central infection？ autoimmune ？pulmonary infection？ 2.系统性红...	1.systemic lupus erythematosus 2..播散性 new type cryptococcosis3.血小板减少4.2 type 糖...	Infection ward(6A-7)	2011-02-21	2011-03-06	13
161	7	female	38	complete	1.cryptococcal meningitis	1.cryptococcal meningitis2.drug eruption	Infection ward(6A-7)	2011-02-21	2011-03-23	30
162	55	male	46		1.左下肺病变性质 yet to be investigated：tuberculosis？tumor？ inflammation ？	1.左下肺病变性质 yet to be investigated：tuberculosis？ Cryptococcus tumor？	Respiratory Internal Medicine Ward(2-16)	2011-03-02	2011-03-04	2
163	8	female	43		1.cryptococcal meningitis	1.cryptococcal meningitis 2.不完全性肠梗阻3.低血钾症	Infection ward(6A-7)	2011-03-03	2011-04-18	46
164	7	female	70		1. new type Cryptococcal sepsis 2.cryptococcus neoformans meningitis？ 3.未分化...	3.Disseminated cryptococcosis（Sepsis，Meninges encephalitis，pulmonary infection）4.未分化结缔组织病5...	Infection ward(6A-10)	2011-03-05	2011-03-19	14
165	6	male	48	complete	1.cryptococcal meningitis	1.cryptococcal meningitis	Infection ward(6A-8)	2011-03-09	2011-04-26	48
166	33	male	76	complete	1.cryptococcus neoformans meningitis	1.cryptococcus neoformans meningitis2.Prostatic hyperplasia	Infection ward(6A-7)	2011-03-16	2011-04-20	35
167	56	male	34		1.Left upper pulmonary nodule查： Cryptococcus tumor？tuberculosis？	1.Left upper pulmonary nodule查： Cryptococcus tumor？tuberculosis？	Respiratory Internal Medicine Ward(2-16)	2011-03-17	2011-03-21	4
168	11	male	40		1.viral encephalitis 2. herpes zoster 3.AIDS 4.免疫重建综合...	1.viral encephalitis2. herpes zoster3.AIDS4.免疫重建综合征5. new type Cryptococcus ...	Infection ward(9-3)	2011-03-17	2011-03-23	6
169	2	male	48	complete	1.cryptococcal meningitis	1.cryptococcal meningitis	Infection ward(6A-9)	2011-03-21	2011-03-24	3
170	3	male	68		1.cryptococcal meningitis	1.cryptococcal meningitis 2. chronic 性胃炎	Infection ward(6A-11)	2011-03-25	2011-03-28	3
171	6	male	47		1.右下Pulmonary nodule yet to be investigated：tuberculosis？ Cryptococcus tumor？	1.右下Pulmonary nodule yet to be investigated：tumor？tuberculosis？ Cryptococcus	Respiratory Internal Medicine Ward(2-16)	2011-03-31	2011-04-08	8
172	27	male	44	complete	1.cryptococcal meningitis 2.Cryptococcal pneumonia 3. Renal transplant failure 能 血透维持...	1.cryptococcal meningitis2. pneumonia	Infection ward(6A-11)	2011-04-12	2011-05-10	28
173	50	female	42		1.肾上腺肿块 2.cryptococcal meningitis 3.deep venous thrombosis	1.cryptococcal meningitis2.脑积水3.吸入性 pneumonia4.肾上腺肿块5.下肢深静脉...	Infection ward(6A-7)	2011-04-18	2011-06-15	58
174	22	male	19	complete	1.cryptococcus neoformans meningitis	1.cryptococcus neoformans meningitis2. AIDS	Infection ward(6A-12)	2011-04-21	2011-05-04	13
175	23	male	32	complete	1.cryptococcal meningitis 2.hypokalemia 3.pulmonary infection	1.cryptococcal meningitis2.hypokalemia3.pulmonary infection	Infection ward(6A-6)	2011-04-25	2011-04-29	4
176	7	male	58		1.cryptococcosis 肺2.移植肾CKD-Ⅱ 3.肝炎 Hepatitis B	1.cryptococcosis2.移植肾CKD-Ⅱ3.肝炎	Respiratory Internal Medicine Ward(10-2)	2011-05-05	2011-05-18	13
177	30	male	73		1.cryptococcal meningitis 2.口腔 infection	1.cryptococcal meningitis2.口腔 infection 3.hypokalemia	Infection ward(6A-7)	2011-05-06	2011-05-24	18
178	1	male	51			1.Pulmonary cryptococcosis2. chronic 性迁延 type viral hepatitis B	Respiratory Internal Medicine Ward(2-14)	2011-05-11	2011-05-26	15
179	26	male	48		1.Pulmonary cryptococcosis 2.胃癌 postoperative	1.Pulmonary cryptococcosis2.胃癌 postoperative	Respiratory Internal Medicine Ward(2-16)	2011-05-16	2011-05-20	4
180	5	male	31		1. AIDS 2.cryptococcus neoformans meningitis 3.尖锐湿疣 4.肺隐球...	1. AIDS 2.cryptococcus neoformans meningitis3.尖锐湿疣4.Pulmonary cryptococcosis5.贫血6....	Infection ward(9-3)	2011-05-24	2011-07-28	65
181	7	female	61		1.meningitis fungous2.心律失常 3. polymyositis 4.hypertension ...	1.cryptococcal meningitis2. polymyositis 3.心律失常4.心力衰竭5.静脉血栓形...	Infection ward(6A-9)	2011-05-26	2011-06-28	33
182	1	male	30		1.头痛 yet to be investigated2.viralmeningitis 3.Tuberculous meningitis 4. Cryptococcus ...	1. AIDS 2.cryptococcus neoformans meningitis3. respiratory failure 4.循环衰竭5.pulmonary infection	Infection ward(9-3)	2011-05-30	2011-06-06	7
183	6	male	68		1.cryptococcal meningitis 2.不明原因发热 tuberculosis可能	1.cryptococcal meningitis2.gout3. pneumonia	Infection ward(6A-11)	2011-06-07	2011-06-09	2
184	18	male	37		1.cryptococcal meningitis 2.肝炎cirrhosis（失代偿性），Hepatitis B 3.精...	1.cryptococcal meningitis2.肝炎cirrhosis（失代偿性），Hepatitis B3.腹水4.脾肿大5...	Infection ward(6A-6)	2011-06-07	2011-08-02	56
185	50	female	41		1.cryptococcal meningitis 脑积水 脑室外引流术＋OMAYA管置入术...	1.cryptococcal meningitis2.吸入性 pneumonia3.肾上腺肿块4.deep venous thrombosis5...	Infection ward(6A-7)	2011-06-15	2011-07-15	30
186	27	male	43		1.Pulmonary cryptococcosis 右下2.viral hepatitis B	1.Pulmonary cryptococcosis2.viral hepatitis B	Respiratory Internal Medicine Ward(10-2)	2011-06-17	2011-06-22	5
187	27	male	73		1.cryptococcal meningitis	1.cryptococcal meningitis2. chronic 性浅表性胃炎3.十二指肠球部溃疡	Infection ward(6A-7)	2011-06-17	2011-06-28	11
188	32	male	55		1.Pulmonary cryptococcosis	1.Pulmonary cryptococcosis	Respiratory Internal Medicine Ward(2-14)	2011-06-27	2011-07-07	10
189	33	male	56		1.cryptococcal meningitis	1.cryptococcal meningitis2.帕金森病	Infection ward(6A-11)	2011-07-01	2011-07-11	10
190	20	male	77		1.左肺病灶 Cryptococcus	1.Pulmonary cryptococcosis	Respiratory Internal Medicine Ward(10-2)	2011-07-04	2011-07-07	3
191	5	male	41		1.cryptococcal meningitis	1. AIDS 2.cryptococcal meningitis3.Pulmonary cryptococcosis4.甲癣5. Venous thrombosis	Infection ward(9-3)	2011-07-07	2011-09-03	58
192	51	male	54		1.Pulmonary cryptococcosis 2.hypertension	1.Pulmonary cryptococcosis2.hypertension	Respiratory Internal Medicine Ward(2-16)	2011-07-13	2011-07-20	7
193	2	male	44		1.cryptococcosis 右肺cryptococcosis	1.cryptococcosis	Respiratory Internal Medicine Ward(2-14)	2011-07-15	2011-07-25	10
194	36	male	46		1.cryptococcal meningitis 2.Pulmonary cryptococcosis	1.cryptococcal meningitis2.Pulmonary cryptococcosis	Infection ward(6A-11)	2011-08-11	2011-09-15	35
195	28	male	73		1.cryptococcal meningitis	1.cryptococcal meningitis	Infection ward(6A-7)	2011-08-11	2011-08-15	4
196	2	male	68		1.cryptococcal meningitis 2.gout	1.cryptococcal meningitis2.gout3.pulmonary infection	Infection ward(6A-11)	2011-08-16	2011-08-17	1
197	3	male	31			1. AIDS 2.cryptococcus neoformans meningitis3. herpes zoster4.尖锐湿疣5.Pulmonary cryptococcosis	Infection ward(9-3)	2011-08-23	2011-08-24	1
198	15	male	39		1. AIDS 2.viral hepatitisHepatitis B 3.pulmonary infection	1. AIDS 2.cryptococcal meningitis3.pulmonary infection4.viral hepatitisHepatitis B5.低蛋白血...	Infection ward(9-3)	2011-08-27	2011-09-03	7
199	52	female	53		1.右Pulmonary nodule fungous？neoplastic？tuberculosis ?2.鼻咽恶性tumor 放疗...	1.右Pulmonary cryptococcosis2.鼻咽恶性tumor3.美尼尔氏病（内淋巴积水）4.放射性...	Respiratory Internal Medicine Ward(2-16)	2011-09-16	2011-09-23	7
200	35	male	49		2.肺占位 lung cancer？	1.Pulmonary cryptococcosis	Internal Medicine Ward One Ward(6B-19)	2011-09-20	2011-09-30	10
201	27	male	75		1.Tuberculous meningitis 2.tuberculosis 胸膜炎(Ⅴ type )，未提及细菌学或组...	1.cryptococcal meningitis2. cerebral infarction 3.pulmonary infection4.颈动脉粥样硬化5.hypokalemia...	Infection ward(9-4)	2011-09-23	2011-11-04	42
202	36	male	31		1.cryptococcal meningitis 2.fatty liver	1.cryptococcosis2.cryptococcal meningitis3.fatty liver4.viral hepatitis5.hypokalemia	Infection ward(6A-6)	2011-09-27	2011-11-01	35
203	18	female	56		1.Headache to be investigated cryptococcosis？狼疮脑病？2.systemic lupus erythematosus	1.cryptococcal meningitis2.systemic lupus erythematosus	Infection ward(6A-12)	2011-10-06	2011-11-15	40
204	6	male	41			1. AIDS 2.cryptococcal meningitis	Infection ward(9-3)	2011-10-10	2011-10-11	1
205	26	male	33		1.Pulmonary cryptococcosis 2.hypertension	1.Pulmonary cryptococcosis2.hypertension	Respiratory Internal Medicine Ward(2-14)	2011-10-11	2011-10-25	14
206	38	female	38		1.Headache to be investigated 2.血小板减少性紫癜	1.cryptococcal meningitis2.血小板减少性紫癜	Infection ward(6A-8)	2011-10-12	2012-01-20	100
207	55	male	44		1.脑积水 2.hypertension 3.renal transplant state postoperative	1.Cryptococcal encephalitis2.脑积水3.癫痫4.hypertension 5.renal transplant state	Infection ward(6A-7)	2011-10-15	2011-11-04	20
208	6	male	66		1.intracranial infection 隐脑？viral？tuberculosis ？	1.cryptococcal meningitis	Infection ward(6A-8)	2011-11-04	2011-11-29	25
209	9	male	31		1. AIDS 2.cryptococcal meningitis 3.尖锐湿疣	1. AIDS 2.cryptococcal meningitis3.尖锐湿疣4.白细胞减少症5.血小板增多	Infection ward(9-3)	2011-11-07	2011-11-15	8
210	23	male	42			1.cryptococcal meningitis2.renal transplant postoperative	Infection ward(6A-11)	2011-11-09	2011-12-14	35
211	1	male	67		1.cryptococcal meningitis 2.pulmonary infection 3.hypertension	1.cryptococcal meningitis2.pulmonary infection3.hypertension 4.吸入性 pneumonia5. respiratory failure	Comprehensive Ward 5(5-4A)	2011-11-10	2012-02-03	85
212	12	male	40		1.cryptococcal meningitis 2.房颤 心房颤动3.偏头痛 4.荨麻疹...	1. AIDS 2.cryptococcus neoformans meningitis3.房颤4. diarrhea 5.白细胞减少症6.贫...	Infection ward(9-3)	2011-11-18	2012-01-19	62
213	29	male	42		1.cryptococcal meningitis 2.hepatitis B Virus carrying 者 3.肺占位 肺 Cryptococcus ...	1.cryptococcal meningitis2.腰椎间盘突出3.nasosinusitis	Infection ward(6A-11)	2011-11-22	2011-12-28	36
214	17	male	74		1.cryptococcal meningitis	1.cryptococcal meningitis	Infection ward(6A-11)	2011-11-23	2011-12-30	37
215	25	male	33		1.cryptococcal meningitis 2. pneumonia cryptococcal 3.viral hepatitisHepatitis B chronic 性...	1.cryptococcal meningitis2. pneumonia3.viral hepatitisHepatitis B chronic 性轻度4.胆囊结石5.肾...	Infection ward(6A-9)	2011-11-26	2012-01-12	47
216	5	female	49		1.Pulmonary cryptococcosis 2.hypertension 3.viral hepatitis B chronic 性4.肝...	1.Pulmonary cryptococcosis2.hypertension 3.viral hepatitis B4.肝内胆管结石	Respiratory Internal Medicine Ward(2-14)	2011-11-30	2011-12-13	13
217	1	male	42			1.cryptococcal meningitis	Infection ward(6A-11)	2011-12-16	2011-12-16	1
218	8	male	75		1.cryptococcus neoformans meningitis 3.pulmonary infection 4.胃大部切除 postoperative 病...	1.cryptococcus neoformans meningitis2.pulmonary infection3.胃大部切除 postoperative 4.rheumatoid arthritis5...	Infection ward(6A-9)	2011-12-16	2011-12-29	13
219	1	male	64		1.interstitial pneumonia 2.血管炎 ?3.卡氏肺孢子菌 pneumonia ?4.病...	1. AIDS 2.耶氏肺孢子菌 pneumonia3.cryptococcal meningitis4.低蛋白血症5.电解...	Infection ward(9-3)	2011-12-18	2011-12-30	12
220	10	male	41			1. AIDS 2.cryptococcal meningitis	Infection ward(9-3)	2011-12-19	2011-12-20	1
221	29	male	21		1.Pulmonary cryptococcosis	1.Pulmonary cryptococcosis	Respiratory Internal Medicine Ward(2-16)	2011-12-23	2012-01-04	12
222	19	male	55		1.cryptococcosis Cryptococcal pneumonia、 Cryptococcus 脑病？2.Headache to be investigated infectious...	1.cryptococcosis	Infection ward(6A-6)	2012-01-09	2012-03-19	70
223	1	female	38		1.cryptococcosis Lungs，胸椎，骶椎2.systemic lupus erythematosus	1.cryptococcosis2.systemic lupus erythematosus	Infection ward(6A-12)	2012-01-09	2012-01-11	2
224	12	male	38		1.Bilateral lung mass tumor Consider first2.renal transplant postoperative	1.Pulmonary cryptococcosis2.renal transplant state	Respiratory Internal Medicine Ward(2-14)	2012-01-12	2012-01-27	15
225	21	male	34		1.Headache to be investigated intracranial infection：Tuberculous meningitis？viralmeningitis？化脓性脑...	1.cryptococcal meningitis2.Pulmonary cryptococcosis3.肾囊肿4.腰椎退行性变5. chronic 性肾功...	Infection ward(6A-11)	2012-01-14	2012-01-30	16
226	1	female	44		1.Bilateral lung lesions 肉芽肿性炎， fungal infection Wait to confirm	1.Pulmonary cryptococcosis	Respiratory Internal Medicine Ward(2-14)	2012-01-17	2012-01-30	13
227	27	male	44		1.cryptococcal meningitis	1.cryptococcal meningitis2.pulmonary infection	Infection ward(6A-6)	2012-01-28	2012-02-27	30
228	1	female	55		1.Pulmonary cryptococcosis	1.Pulmonary cryptococcosis2.高脂血症	Respiratory Internal Medicine Ward(2-14)	2012-02-02	2012-02-10	8
229	27	male	41		1.右肺病灶 fungal infection ？tuberculosis？ pneumonia？血管炎？	1.Pulmonary cryptococcosis	Respiratory Internal Medicine Ward(2-14)	2012-02-10	2012-02-20	10
230	11	male	41		1.cryptococcal meningitis 2.pulmonary infection 3.Hepatitis B cirrhosis Decompensation,...	1.cryptococcal meningitis2.Hepatitis B cirrhosis3.pulmonary infection	Infection ward(6A-9)	2012-02-11	2012-02-27	16
231	10	male	43		1. AIDS 2.cryptococcal meningitis 3.脂溢性皮炎	1. AIDS 2.cryptococcal meningitis3.脂溢性皮炎	Infection ward(9-3)	2012-02-13	2012-02-29	16
232	2	male	55		1.右肺病灶 cryptococcosis2.renal transplant state	1.右Pulmonary cryptococcosis2.renal transplant postoperative	Respiratory Internal Medicine Ward(2-16)	2012-02-21	2012-03-07	15
233	51	male	39	complete	1.viral hepatitis，Hepatitis B， chronic 加急性liver failure	1.viral hepatitis，Hepatitis B， chronic 加急性liver failure2.cryptococcal meningitis	Infection ward(6A-8)	2012-03-19	2012-06-26	99
234	18	female	68	撤销	1.cryptococcal meningitis	1.cryptococcal meningitis	Infection ward(6A-11)	2012-03-21	2012-05-09	49
235	19	male	64		1.fever of unknown origin pneumonia2.酒精性肝炎 3.hypertension	1.Pulmonary cryptococcosis2.酒精性肝炎3.hypertension	Infection ward(6A-10)	2012-03-29	2012-04-26	28
236	37	male	49		1.咯血 yet to be investigated	1.Pulmonary cryptococcosis	Infection ward(6A-8)	2012-04-04	2012-05-24	50
237	21	male	42		1.cryptococcal meningitis 2.颅内静脉窦血栓形成 3.两Pulmonary nodule	1.cryptococcal meningitis2.颅内静脉窦血栓形成3.两Pulmonary nodule	Infection ward(6A-7)	2012-04-09	2012-04-20	11
238	26	female	63		1.fever of unknown origin 隐脑？fungal meningitis？2.干燥综合征 3.hypertension...	1.cryptococcal meningitis2.pulmonary infection3.干燥综合征4.膀胱炎5.hypertension 6....	Infection ward(6A-12)	2012-04-16	2012-04-29	13
239	9	male	37		1.肾占位 右侧2.Pulmonary cryptococcosis left 、 postoperative	1.肾癌2.Pulmonary cryptococcosis	Urology Ward(5-2)	2012-05-03	2012-05-16	13
240	6	male	39	撤销	1.fever of unknown origin infectious？tumor？	1. AIDS 2.cryptococcus neoformans meningitis	Infection ward(6A-11)	2012-05-04	2012-05-21	17
241	33	male	64		1.Pulmonary cryptococcosis 头部转移 infection ？2.hypertension 3.胆囊息肉 4...	1.Pulmonary cryptococcosis2.hypertension 3.胆囊息肉4.肾囊肿5.aortic insufficiency6...	Infection ward(6A-7)	2012-05-14	2012-05-16	2
242	52	male	40	撤销	1.cryptococcus neoformans meningitis 2.Pulmonary cryptococcosis 3.hypertension 4.胆...	1.cryptococcus neoformans meningitis2.Pulmonary cryptococcosis3.hypertension 4.胆囊息肉	Infection ward(6A-11)	2012-05-17	2012-05-31	14
243	10	male	33	撤销	1.cryptococcal meningitis	1.cryptococcal meningitis2.导管相关性发热	Infection ward(6A-11)	2012-05-18	2012-06-20	33
244	11	male	30	complete	1.cryptococcus neoformans meningitis 2.viral hepatitis Hepatitis B， chronic 性	1.cryptococcus neoformans meningitis2.viral hepatitis3.眼底出血4.hypokalemia	Infection ward(6A-8)	2012-05-23	2012-07-11	49
245	9	female	45		1.cryptococcosis 右肺	1.cryptococcosis	Respiratory Internal Medicine Ward(2-14)	2012-05-25	2012-06-05	11
246	26	male	38	complete	1.cryptococcal meningitis 2.矽肺(硅肺) 3.pulmonary tuberculosis (陈旧性)	1.cryptococcal meningitis2.矽肺(硅肺)3.pulmonary tuberculosis	Infection ward(6A-7)	2012-05-28	2012-07-08	41
247	52	male	19		1.右肺病灶 pneumonia？tuberculosis？	1.Pulmonary cryptococcosis	Respiratory Internal Medicine Ward(2-14)	2012-05-31	2012-06-12	12
248	8	male	34		1. AIDS 2.central nervous system infection 3.耶氏肺孢子菌 pneumonia 4....	1. AIDS 2.cryptococcus neoformans meningitis3.pulmonary infection4.口腔念珠菌 infection (鹅口疮...	Infection ward(9-3)	2012-06-01	2012-06-03	2
249	31	female	46		1.Bilateral lung lesions 两pulmonary mycosis，cryptococcosis Consider first2.hypertension	1.Pulmonary cryptococcosis2.hypertension	Respiratory Internal Medicine Ward(2-14)	2012-06-07	2012-06-14	7
250	26	male	34		1.intracranial infection Cryptococcal meningoencephalitis	1.cryptococcal meningitis	Infection ward(6A-12)	2012-06-11	2012-06-29	18
251	26	female	79	complete	1.fever of unknown origin 2.rheumatoid arthritis 3.干燥综合征 4.间质性肺...	1.cryptococcal meningitis2.rheumatoid arthritis3.干燥综合征5.低蛋白血症6.急性...	Infection ward(6A-6)	2012-06-18	2012-07-13	25
252	18	male	39		1.Pulmonary cryptococcosis	1.Pulmonary cryptococcosis	Respiratory Internal Medicine Ward(10-2)	2012-06-21	2012-06-26	5
253	36	male	44	complete	1.Meninges encephalitis fungous？viral？tuberculosis ？化脓性？	1.cryptococcal meningitis	Infection ward(6A-7)	2012-07-05	2012-08-14	40
254	30	male	54		1.肝移植状态	1.肝移植状态2.cryptococcosis	Hepatobiliary Pancreatic Surgery Center Three Wards(6A-13)	2012-07-16	2012-08-09	24
255	12	female	32		1.meningitis Cryptococcus 细菌？病毒?tuberculosis？2.myasthenia gravis 3.糖...	1.cryptococcal meningitis2.myasthenia gravis3.diabetes4.继发性癫痫	Neurological Second Ward(7-4)	2012-07-21	2012-08-16	26
256	5	female	45	complete	1.meningitis tuberculosis ？ cryptococcal ?2.pulmonary infection	1.cryptococcosis3.cryptococcal meningitis4.Pulmonary cryptococcosis	Infection ward(6A-8)	2012-08-03	2012-09-15	43
257	32	male	55	complete	1.cryptococcal meningitis 2.Hepatitis B cirrhosis 肝移植 postoperative	1.cryptococcal meningitis2.肝移植状态	Infection ward(6A-6)	2012-08-10	2012-08-14	4
258	18	male	39	complete	1. AIDS 2.intracranial infection 隐脑？Tuberculous meningitis？	1. AIDS 2.cryptococcus neoformans meningitis3.肺动脉栓塞4.白细胞减少症	Infection ward(9-3)	2012-08-13	2012-09-27	45
259	27	male	33	complete	1.cryptococcal meningitis	1.cryptococcal meningitis	Infection ward(6A-11)	2012-08-14	2012-11-13	91
260	3	female	62	complete	1.fever of unknown origin Central system infection？tumor？ autoimmune 疾病？2.hypertension...	1.cryptococcal meningitis2.hypertension	Infection ward(6A-9)	2012-08-20	2012-09-03	14
261	13	male	60	complete	1.移植肾状态 2.renal hypertension 3.pulmonary infection	1.cryptococcal meningitis2.移植肾状态3.renal hypertension4.pulmonary infection	Infection ward(6A-9)	2012-09-10	2013-01-08	120
262	20	male	63	complete	1.cryptococcal meningitis	1.cryptococcal meningitis	Infection ward(6A-11)	2012-09-11	2012-09-25	14
263	20	male	53	complete	1.cryptococcus neoformans meningitis 2.viral hepatitisHepatitis B 3.大隐静脉曲张...	1.cryptococcus neoformans meningitis2.viral hepatitisHepatitis B3.大隐静脉曲张	Infection ward(6A-10)	2012-10-02	2012-11-23	52
264	16	male	34	撤销	1. AIDS 2.drug eruption	1.获得性免疫缺陷病2. drug-induced hepatitis3.drug eruption4.cryptococcal meningitis	Infection ward(9-3)	2012-10-05	2012-12-03	59
265	27	female	40	complete	1.cryptococcal meningitis	1.cryptococcal meningitis	Infection ward(6A-9)	2012-10-06	2012-12-11	66
266	17	male	46	complete	1. AIDS 2.cryptococcus neoformans meningitis 3.hypokalemia	1.获得性免疫缺陷病2.cryptococcus neoformans meningitis3.Pulmonary cryptococcosis4.hypokalemia5...	Infection ward(9-3)	2012-10-09	2012-11-14	36
267	25	male	50	撤销	1.central nervous system infection Tuberculous meningitis？2.神经纤维瘤病 皮肤3...	1.Cryptococcal encephalitis2.神经纤维瘤3.nature of lung lesions to yet to be investigated	Infection ward(6A-7)	2012-10-15	2012-11-06	22
268	51	female	66	complete	1.fever of unknown origin 2.type 2 diabetes 3.diabetes性白内障 双眼4.糖...	1.tuberculosis病2.cryptococcosis3.type 2 diabetes4.diabetes性白内障5.diabetes性周围...	Infection ward(6A-11)	2012-10-20	2012-11-10	21
269	8	female	41		1. encephalitis 2. abnormal liver function viral？drug-induced？	1.cryptococcal meningitis2. Liver function damage yet to be investigated	Infection ward(9-3)	2012-10-29	2012-12-05	37
270	16	male	75	complete	1.central nervous system infection cryptococcal Consider first	1.cryptococcal meningitis2.hypokalemia	Infection ward(6A-10)	2012-11-02	2012-12-14	42
271	16	female	81	complete	1.cryptococcal meningitis 2.hypertension 3 level 3.type 2 diabetes	1.cryptococcal meningitis2.hypertension 3 level 3.type 2 diabetes	Infection ward(6A-11)	2012-11-12	2012-11-21	9
272	1	male	42	complete	1. AIDS ?2.Central infection new type Cryptococcus tuberculosis ？viral？	1. AIDS 2.cryptococcal meningitis3. intracranial hypertension 4. respiratory failure	Infection ward(9-3)	2012-11-15	2012-11-19	4
273	38	male	41		1.renal transplant state 2.Headache to be investigated	1.renal transplant state2. Transplanted kidney dysfunction 3.cryptococcal meningitis	Neurosurgery ward(5-7)	2012-11-20	2012-12-29	39
274	16	female	26	complete	1.cryptococcal meningitis 2.systemic lupus erythematosus 3. Lupus nephritis	1.cryptococcal meningitis2.systemic lupus erythematosus3. Lupus nephritis	Infection ward(6A-11)	2012-11-20	2012-11-26	6
275	36	male	55		1.Pulmonary cryptococcosis 2.心律失常 阵发性心房颤动	1.Pulmonary cryptococcosis2.心律失常	Respiratory Internal Medicine Ward(2-14)	2012-11-22	2012-12-03	11
276	17	male	39	complete	1.meningitis tuberculosis ？ cryptococcal ？2.皮肌炎	1.cryptococcal meningitis2.皮肌炎	Infection ward(6A-12)	2012-11-24	2012-12-02	8
277	23	male	34		1.Pulmonary cryptococcosis 2.viral hepatitis B	1.Pulmonary cryptococcosis2.viral hepatitis B	Respiratory Internal Medicine Ward(2-14)	2012-12-03	2012-12-17	14
278	18	male	48	complete	1.Central infection 2.获得性免疫缺陷病 ?3.肛周尖锐湿疣	1.cryptococcus neoformans meningitis2. AIDS 3.肛周尖锐湿疣	Infection ward(9-3)	2012-12-07	2013-01-03	27
279	15	female	35	complete	1.pulmonary infection 2.renal transplant postoperative 3.红斑狼疮	1.pulmonary infection2.cryptococcal meningitis3.renal transplant postoperative 4.红斑狼疮	Infection ward(6A-10)	2012-12-10	2013-01-24	45
280	1	male	22	complete	1. AIDS ?2.Headache to be investigated viral？免疫性？3.syphilis 4.疣...	1.cryptococcal meningitis2.cerebral hernia3. respiratory failure 4.循环衰竭5.获得性免疫缺陷病...	Infection ward(9-3)	2012-12-15	2012-12-18	3
281	12	male	40	撤销	1.Central infection cryptococcal meningitis2.获得性免疫缺陷病 ？3.syphilis...	1.cryptococcal meningitis2.获得性免疫缺陷病3.syphilis4.尖锐湿疣5.viral肝...	Infection ward(9-3)	2012-12-18	2012-12-23	5
282	10	male	48	撤销	1. AIDS 2.Headache to be investigated 3. herpes zoster后遗神经痛	1. AIDS 2.cryptococcal meningitis3. herpes zoster后遗神经痛	Infection ward(9-3)	2012-12-19	2012-12-31	12
283	9	female	59	complete	1.卡氏肺囊虫性 pneumonia 两肺间质性病变2.renal transplant state	1.cryptococcal meningitis2.卡氏肺囊虫性 pneumonia3.renal transplant state	Infection ward(6A-11)	2012-12-31	2013-02-04	35
284	2	female	42	complete	1.cryptococcal meningitis	1.cryptococcal meningitis	Infection ward(6A-9)	2013-01-02	2013-01-06	4
285	33	male	37	撤销	1. pneumonia cryptococcosis	1.Pulmonary cryptococcosis2.肠道菌群失调3.溃疡性结肠炎	Respiratory Internal Medicine Ward(10-2)	2013-01-10	2013-02-04	25
286	20	male	54	撤销	1.Central infection tuberculosis？ Cryptococcus 包虫病？2.Lungs占位	1.cryptococcal meningitis2.Pulmonary cryptococcosis	Infection ward(6A-9)	2013-01-15	2013-02-21	37
287	1	male	44		1.Lungs占位 fungal infection Consider first	1.Pulmonary cryptococcosis	Respiratory Internal Medicine Ward(2-16)	2013-01-18	2013-01-25	7
288	51	male	64		1.右Pulmonary cryptococcosis 锲形手 postoperative 2.hypertension	1.右Pulmonary cryptococcosis2.hypertension	Respiratory Internal Medicine Ward(2-14)	2013-01-24	2013-01-29	5
289	20	male	54		1.Pulmonary cryptococcosis	1.Pulmonary cryptococcosis	Respiratory Internal Medicine Ward(2-14)	2013-01-24	2013-02-07	14
290	26	male	34	complete	1.cryptococcal meningitis	1.cryptococcal meningitis	Infection ward(6A-11)	2013-02-26	2013-02-28	2
291	12	male	70		1.central nervous system infection viralmeningitis Consider first2.支气管扩张 combine ...	1. AIDS 2.cryptococcus neoformans meningitis3.口腔念珠菌 infection (鹅口疮)4.支气管...	Infection ward(9-3)	2013-03-04	2013-03-27	23
292	35	female	51		1.fever of unknown origin 2.血小板减少症	1.cryptococcal meningitis2.血小板减少症	Infection ward(6A-12)	2013-03-11	2013-03-26	15
293	15	male	43		1. AIDS （后天性免疫缺乏综合症） 2.cryptococcosis pneumonia	1. AIDS 2.Pulmonary cryptococcosis3.hypokalemia	Infection ward(9-3)	2013-03-18	2013-04-04	17
294	27	male	37	撤销	1.Hepatitis B cirrhosis Decompensation2.消化道出血 3.食管胃底静脉曲张...	1.Hepatitis B cirrhosis2.消化道出血3.食管胃底静脉曲张4.腹水5. new type Cryptococcus ...	Infection ward(6A-11)	2013-03-19	2013-04-17	29
295	5	male	54		1.cryptococcus neoformans meningitis 2.viral hepatitis B 3.大隐静脉曲张...	1.cryptococcus neoformans meningitis2.Pulmonary cryptococcosis3.viral hepatitis B4.大隐静脉曲张...	Infection ward(9-3)	2013-03-21	2013-04-08	18
296	32	female	48		1.cryptococcosis 肺2. breast cancer postoperative 3.卵巢囊肿 4.乳腺增生 ...	1.cryptococcosis2. breast cancer postoperative 3.卵巢囊肿4.乳腺增生5.thyroid node 6.胆...	Respiratory Internal Medicine Ward(10-2)	2013-04-01	2013-04-11	10
297	10	male	48		1.cryptococcal meningitis 2.renal transplant postoperative 3.viral hepatitis B	1.cryptococcal meningitis2.renal transplant postoperative 3.viral hepatitis B	Infection ward(6A-11)	2013-04-08	2013-05-14	36
298	5	male	55		1.viral pneumonia 重症，疑似人 infection H7N9高致病性禽流感2.呼...	1. AIDS 2.耶氏肺孢子菌 pneumonia3. respiratory failure 4.cryptococcosis	Infection ward(9-3)	2013-04-21	2013-06-04	44
299	37	male	28		1.肝移植状态 2. abnormal liver function 排异反应 consider 3.cryptococcosis	1.肝移植状态2.移植肝急性排异反应3.cryptococcosis	Hepatobiliary Pancreatic Surgery Center Three Wards(6A-13)	2013-04-23	2013-05-03	10
300	6	male	43		1.cryptococcal meningitis	1.cryptococcosis2. AIDS 3.syphilis4.贫血	Infection ward(9-3)	2013-04-25	2013-06-14	50
301	3	female	20		1.乏力 yet to be investigated 视神经脊髓炎？多发性硬化？Central infection?2.系统性...	1.cryptococcal meningitis2.systemic lupus erythematosus3.多发性硬化4.tuberculosis病	Digestive Internal Medicine Second Ward(2-18)	2013-04-26	2013-06-04	39
302	7	male	66		1.cryptococcal meningitis	1.cryptococcal meningitis2.hypertension 3. pneumonia	Infection ward(6A-10)	2013-04-29	2013-05-27	28
303	5	female	73		1.肠梗阻	1.cryptococcal meningitis2.tuberculosis 腹膜炎3.肠梗阻	Infection ward(9-4)	2013-05-08	2013-08-30	114
304	18	male	35		1.Pulmonary cryptococcosis	1.Pulmonary cryptococcosis	Respiratory Internal Medicine Ward(10-2)	2013-05-17	2013-05-31	14
305	13	male	76		1.胰腺癌 postoperative ，化疗后1月2.Lungs占位 Cryptococcal pneumonia首先考...	1.Pulmonary cryptococcosis2.胰腺癌3.hypertension	Respiratory Internal Medicine Ward(2-16)	2013-05-24	2013-06-07	14
306	8	male	24		1.cryptococcal meningitis	1. AIDS 2.cryptococcal meningitis3.viral hepatitis B5.低蛋白血症6.贫血7...	Infection ward(9-3)	2013-05-26	2013-07-01	36
307	8	male	25		1. AIDS 2.cryptococcal meningitis 4.非典 type 性分枝杆菌 infection	1. AIDS 2.cryptococcal meningitis3.鸟分支杆菌复合体病	Infection ward(9-3)	2013-05-27	2013-05-29	2
308	28	male	17		1.cryptococcal meningitis	1.cryptococcal meningitis	Infection ward(6A-9)	2013-06-03	2013-07-02	29
309	5	male	59		1.central nervous system infection Cryptococcal encephalitis？2.hypertension 2 level	1. AIDS 2.cryptococcal meningitis3.白细胞减少症4.hypertension 2 level	Infection ward(9-3)	2013-06-04	2013-07-23	49
310	30	male	43		1.cryptococcal meningitis 2.Hepatitis B cirrhosis Decompensation3.上消化道出血...	1.cryptococcal meningitis2.Hepatitis B cirrhosis3.上消化道出血4.肝性脑病	Infection ward(6A-9)	2013-06-06	2013-07-27	51
311	10	female	50		1.Bipulmonary病变 fungous pneumonia？2.cryptococcal meningitis 3.未分化结缔...	1.cryptococcosis3.giant cell virus infection 4.cryptococcal meningitis5. pneumonia6.未分化结缔...	Infection ward(6A-10)	2013-06-10	2013-07-19	39
312	7	male	36		1.AIDS 2.fever of unknown origin 3.肾囊肿	1. AIDS 3.Pulmonary cryptococcosis4.肾囊肿	Infection ward(9-3)	2013-06-21	2013-07-16	25
313	2	male	51		1.Pulmonary cryptococcosis 2.hypertension 3. chronic 性浅表性胃炎	1.Pulmonary cryptococcosis2.hypertension 3. chronic 性浅表性胃炎	Respiratory Internal Medicine Ward(2-16)	2013-06-24	2013-07-01	7
314	10	male	33		1.Bilateral lung lesions 多发空洞 node 影：cryptococcosis？韦格氏肉芽肿？2....	1. AIDS 2.Pulmonary cryptococcosis	Infection ward(9-3)	2013-07-02	2013-07-23	21
315	16	female	53		1.意识不清 yet to be investigated infection ？狼疮脑病？急性脑梗？2.干燥综合征 ...	1.cryptococcal meningitis2.急性 cerebral infarction 3.干燥综合征4.systemic lupus erythematosus5.间...	Digestive Internal Medicine Second Ward(2-18)	2013-07-04	2013-07-07	3
316	10	male	24		1.drug eruption 2. AIDS	1. AIDS 2.drug eruption3.cryptococcosis	Infection ward(9-3)	2013-07-23	2013-08-06	14
317	1	female	56		1.Pulmonary cryptococcosis 右侧2.hypertension	1.Pulmonary cryptococcosis2.hypertension	Respiratory Internal Medicine Ward(2-16)	2013-07-27	2013-08-01	5
318	3	female	51		1.Pulmonary cryptococcosis 2.宫颈癌 Ib1 phase	1.Pulmonary cryptococcosis2.宫颈癌3.嗜酸性粒细胞升高	Respiratory Internal Medicine Ward(2-16)	2013-07-29	2013-08-07	9
319	22	male	69		1.cryptococcal meningitis 2.腔隙性 cerebral infarction 3.矽肺伴 infection 4.肝...	1.cryptococcal meningitis2.腔隙性 cerebral infarction 3.矽肺伴 infection 4.viral hepatitis	Infection ward(6A-12)	2013-08-01	2013-08-09	8
320	20	male	51	complete	1.fever of unknown origin	1.cryptococcal meningitis	Infection ward(6A-11)	2013-08-08	2013-09-27	50
321	35	female	80		1.fever of unknown origin pulmonary infection？ autoimmune 疾病？neoplastic？	1.cryptococcal meningitis2.吸入性 pneumonia3.胸腔积液4.下肢静脉血栓	Infection ward(6A-10)	2013-08-16	2013-12-04	110
322	18	male	38		2.Pulmonary cryptococcosis 3.thyroid功能亢进 4.viral hepatitis B chronic 性	1.Pulmonary cryptococcosis2.thyroid功能亢进症3.viral hepatitis B	Respiratory Internal Medicine Ward(10-2)	2013-08-20	2013-08-28	8
323	27	male	56		1.Pulmonary cryptococcosis	1.Pulmonary cryptococcosis	Respiratory Internal Medicine Ward(2-16)	2013-08-29	2013-09-06	8
324	18	male	53		1.cryptococcosis 2.cryptococcal meningitis 3.Pulmonary cryptococcosis	1.cryptococcosis2.cryptococcal meningitis3.Pulmonary cryptococcosis	Infection ward(6A-6)	2013-08-29	2013-12-05	98
325	10	male	58		1.Pulmonary cryptococcosis 2.hypertension	1.Pulmonary cryptococcosis2.hypertension	Respiratory Internal Medicine Ward(10-2)	2013-09-11	2013-09-18	7
326	39	female	59		1.pulmonary infection 2.cirrhosis（失代偿）	1.cryptococcal meningitis2.pulmonary infection3.cirrhosis（失代偿）	Infection ward(6A-10)	2013-10-07	2013-11-06	30
327	53	male	57		1.cryptococcal meningitis 2.套细胞lymphoma	1.cryptococcal meningitis2.lymphoma	Infection ward(6A-11)	2013-10-14	2013-10-28	14
328	-5	male	32		1.cryptococcus neoformans meningitis 2.pulmonary infection cryptococcal 肺病？pulmonary tuberculosis？...	1.cryptococcal meningitis	Infection ward(6A-12)	2013-10-17	2013-11-18	32
329	3	male	28		1.HIV infection 状态（HIV阳性） 2.颅内病变	1.AIDS2.脑白质病3.Pulmonary cryptococcosis5.bacterial pneumonia6.气...	Infection ward(9-3)	2013-10-22	2013-12-09	48
330	10	male	63		1.cryptococcus neoformans meningitis 2.type 2 diabetes 3.hypertension 极高危	1.cryptococcal meningitis2.type 2 diabetes3.hypertension	Infection ward(6A-11)	2013-10-24	2013-12-19	56
331	6	male	29		1.AIDS 2.Pulmonary cryptococcosis	1.AIDS2.Pulmonary cryptococcosis	Infection ward(9-3)	2013-11-04	2013-11-05	1
332	39	female	63		1.Pulmonary cryptococcosis 2. rheumatoid arthritis 3. chronic 性胃炎	1.Pulmonary cryptococcosis2. rheumatoid arthritis 3. chronic 性胃炎	Respiratory Internal Medicine Ward(2-16)	2013-11-06	2013-11-18	12
333	35	female	75		1.cryptococcal meningitis 2.diabetes 特殊类 type diabetes3.天疱疮 4...	1.cryptococcal meningitis2.diabetes3.天疱疮4.pulmonary infection5.腰椎压缩性骨折6...	Infection ward(6A-10)	2013-11-08	2013-11-19	11
334	19	female	60		1.central nervous system infection Tuberculous meningitis？神经syphilis？viralmeningitis？...	1.cryptococcal meningitis2.hypertension 3.颈动脉硬化伴粥样斑块形成4.腔隙性脑...	Infection ward(6A-9)	2013-11-11	2013-12-31	50
335	18	male	35		1. AIDS 2.Cryptococcal encephalitis	1. AIDS 2.cryptococcal meningitis	Infection ward(9-3)	2013-11-11	2013-11-12	1
336	55	female	79		1.cryptococcal meningitis 2.type 2 diabetes 3.hypertension	1.cryptococcal meningitis2.type 2 diabetes3.hypertension	Infection ward(6A-11)	2013-11-18	2013-12-06	18
337	15	male	63		1.小脑占位 右侧：胶质瘤？脑脓肿？	1.Cryptococcal encephalitis2.Pulmonary nodule	Infection ward(6A-9)	2013-11-20	2014-01-02	43
338	5	male	38		1.Headache to be investigated Central infection？	1.cryptococcal meningitis	Infection ward(6A-8)	2013-11-20	2013-12-19	29
339	35	male	56		1.cryptococcal meningitis	1.cryptococcal meningitis2.Tuberculous meningitis	Infection ward(6A-11)	2013-11-29	2013-12-17	18
340	9	male	39		1.两pulmonary mycosis Cryptococcal Consider first2.Chronic viral hepatitis Hepatitis B	1.Pulmonary cryptococcosis2.Chronic viral hepatitis	Respiratory Internal Medicine Ward(2-16)	2013-12-04	2013-12-12	8
341	1	female	49		1.Headache to be investigated 蛛网膜下腔出血？ encephalitis？	1.cryptococcal meningitis	Infection ward(6A-11)	2013-12-11	2013-12-27	16
342	28	male	64		1.cryptococcal meningitis 3.Hepatitis B cirrhosis Decompensation	1.Hepatitis B cirrhosis2.肝性脑病3.肝肾综合征4.肝肺综合征5. respiratory failure 6....	Infection ward(6A-11)	2013-12-12	2014-02-17	67
343	23	male	87		1. encephalitis cryptococcal meningitis consider	1.cryptococcal meningitis2. disturbance of consciousness 3.hypokalemia	Infection ward(6A-8)	2013-12-13	2014-01-07	25
344	20	male	58			1.Pulmonary cryptococcosis2.hypertension	Infection ward(9-3)	2013-12-25	2013-12-26	1
345	23	female	47		1.Pulmonary cryptococcosis	1.Pulmonary cryptococcosis	Respiratory Internal Medicine Ward(10-2)	2013-12-27	2014-01-03	7
346	1	male	42		1.AIDS 2.pulmonary infection cryptococcosis？3.肾功...	1.AIDS2.Pulmonary cryptococcosis3. renal insufficiency	Infection ward(9-3)	2013-12-27	2014-01-02	6		1 weeks	1	1									1							1				1			1		1		1	1	400	55	1.8	117	8	56.4	34.1
347	3	male	28		1.cryptococcal meningitis	1.AIDS2.cryptococcal meningitis3.syphilis	Infection ward(6A-6)	2014-01-21	2014-03-05	43		10+ days	1	1							1									1				1			1		1		1	0	210	110	3.7	107	5.6	79.4	11.4
348	7	male	36		1.meningitis 2.AIDS ?	1.cryptococcal meningitis2.AIDS	Infection ward(6A-6)	2014-01-27	2014-02-20	24		1months		1		1			1		1										1				1		1		1		1	1	80	100	3.7	109	17.4	87.4	6.7
349	11	male	31		1.cryptococcal meningitis	1.cryptococcal meningitis	Infection ward(6A-9)	2014-02-07	2014-03-05	26		1months					1	1					1								1				1		1		1		1						5.3	66	28.7
350	1	male	38		1.Pulmonary cryptococcosis 右侧	1.Pulmonary cryptococcosis	Respiratory Internal Medicine Ward(10-2)	2014-02-12	2014-02-25	13
351	27	female	39		1.Bilateral lung lesions fungus ？细菌？tuberculosis？tumor？	1.Pulmonary cryptococcosis	Respiratory Internal Medicine Ward(2-16)	2014-02-17	2014-03-03	14		10 days	1	1							1										1			1			1		1		1	0	190	200	3.9	123	9.5	90.2	7
352	19	male	47		1.cryptococcal meningitis	1.intracranial infection2.cryptococcal meningitis	Infection ward(6A-10)	2014-02-25	2014-03-20	23		half months		1		1							1								1			1			1		1		1	0	350	210	2	117	6.9	79.3	13.7
353	11	male	50		1.Central infection	1.cryptococcal meningitis	Infection ward(6A-11)	2014-03-05	2014-04-01	27	160/卧床	1months+	1	1							1										1			1			1		1		1	1	220	12	3.6	119	7.8	74.4	16.3
354	37	female	65		1.cryptococcal meningitis 2. Depressive state	1.cryptococcal meningitis2. Depressive state	Infection ward(6A-11)	2014-03-07	2014-04-03	27	162/57	2 weeks		1		1							1							1				1			1		1		1	1	430	2	0.6	126	5.2	84.6	6.4
355	8	female	41		1.Cryptococcal encephalitis	1.Cryptococcal encephalitis2. AIDS 3.syphilis	Infection ward(9-3)	2014-03-09	2014-03-14	5	170/72	half year		1		1					1			1							1			1			1		1		1	1	410	200	1	114	10.5	85.7	9.4
356	10	male	67		1.hypertension 3.diabetes 4. glaucoma 双眼， postoperative 5.颈动脉粥...	1.cryptococcal meningitis2.hypertension 3.diabetes4. glaucoma 5.颈动脉粥样硬化6...	Infection ward(6A-11)	2014-03-13	2014-04-22	40	169/86	1months					1					1		1							1				1		1		1		1	0	230	5	4.6	127	7.7	63.6	26
357	3	male	50		1.Pulmonary cryptococcosis 右侧2.type 2 diabetes 3.hypertension 4.胆囊切...	1.Pulmonary cryptococcosis2.type 2 diabetes3.hypertension 4.胆囊切除 postoperative	Respiratory Internal Medicine Ward(10-2)	2014-03-20	2014-03-24	4	174/73	half months	1									1							hepatitis Bcirrhosis（Decompensation）		1				1		1		1		1	0	150	0	5.7	127	4.2	56.6	32.2
358	2	male	64		1.Hepatitis B cirrhosis Decompensation	1.cryptococcosis2.Hepatitis B cirrhosis	Infection ward(6A-12)	2014-03-24	2014-04-16	23	158/49	1months		1		1					0										1			1			1		1		1	1	80	21	2.6	113	6.2	81.5	14.4
359	13	male	44		1.cryptococcal meningitis 2.口腔念珠菌 infection 3.胃炎	1.cryptococcal meningitis2.口腔念珠菌 infection 3.胃炎4.Hepatic cyst5.Prostatic hyperplasia6...	Infection ward(9-3)	2014-03-29	2014-04-21	23	164/60	10 days	1	1								1									1			1			1		1		1	1	250	1500	1.1	111	4.1	74.3	17.2
360	2	female	34		1.cryptococcal meningitis	1.cryptococcosis	Infection ward(6A-11)	2014-04-02	2014-04-17	15	154/56	5 days	1				1						1	1					nephrotic syndrome		1			1		1		1		1		0	130	97	5.7	114	15.4	95.6	2.3
361	10	male	53		1.Bilateral lung lesions infection Consider first2.nephrotic syndrome，系膜增殖性肾小球肾...	1.Pulmonary cryptococcosis2.nephrotic syndrome，系膜增殖性肾小球肾炎3.steroid diabetes4...	Respiratory Internal Medicine Ward(2-16)	2014-04-03	2014-04-22	19	卧床	1months								乏力纳差		1							chronic hepatitis Bliver failure	1				1			1		1		1						3.3	71.5	14.4
362	18	male	49		1.viral hepatitis Hepatitis B2.AIDS 3.syphilis	1.viral hepatitis（重症，Hepatitis B）2.AIDS3.Disseminated cryptococcosis...	Infection ward(9-3)	2014-04-08	2014-04-17	9	170/55	1 weeks		1		1					1									1				1			1		1		1	1	400	0	3.1	126	8.4	88.1	6
363	11	male	45		2.central nervous system infection cryptococcal meningitis3.pulmonary tuberculosis	1.AIDS2.cryptococcal meningitis3.pulmonary tuberculosis，病理（-）4.低...	Infection ward(9-3)	2014-04-08	2014-05-13	35	卧床	half months	1	1								1									1			1			1		1		1	1	380	130	3.1	120	11	89.6	5.7
364	-12	female	55		1.cryptococcosis Cryptococcal meningoencephalitis，Cryptococcal pneumonia2.陈旧性cerebral infarction...	1.cryptococcosis2.陈旧性cerebral infarction	Infection ward(6A-12)	2014-04-08	2014-04-18	10	170/75	2months	1				1			视物不清			1								1				1		1		1		1	1	165	230	2.7	120	9.4	65.2	29.3
365	2	female	48		1. chronic inflammation性脱髓鞘性多发性神经病 2. intracranial hypertension 3.甲状...	1. chronic inflammation性脱髓鞘性多发性神经病2. intracranial hypertension 3.cryptococcal meningitis4....	Neurological Second Ward(7-4)	2014-04-10	2014-05-09	29
366	-7	male	50		1.Lungs阴影 fungus ？tuberculosis？tumor	1.cryptococcosis	Infection ward(6A-12)	2014-04-15	2014-04-30	15	165/50.5	1months	1	1		1						1		1					rheumatoid arthritis		1			1		1		1		1		1	190	70	3.6	120	6.4	69.9	13.2
367	7	male	69	complete	1.lung cancer postoperative 右肺鳞癌，pT2aN2M0，IIIA phase	1.lung cancer postoperative 2.Pulmonary cryptococcosis	Chest Tumor Ward(6B-19)	2014-04-23	2014-05-08	15
368	18	female	48		1.cryptococcal meningitis 2. rheumatoid arthritis 3.hypertension 4.糖...	1.cryptococcal meningitis2. rheumatoid arthritis 3.Pulmonary cryptococcosis4.hypertension 5.糖尿...	Infection ward(9-3)	2014-04-24	2014-04-30	6	168/75	10 days	1							头晕	1										1			1			1		1		1	1	450	160	3	117	9.1	70.1	14.5
369	6	male	49		1.fever of unknown origin intracranial infection？ autoimmune 疾病？	1.cryptococcosis	Infection ward(6A-12)	2014-04-25	2014-05-05	10	171/61	1months	1	1		1					1										1			1			1		1		1	1	400	20	1.3	116	12.9	93.7	3.6
370	6	male	34		1.cryptococcal meningitis 2.cerebral infarction ?	1.cryptococcal meningitis2.upper respiratory tract infection	Infection ward(6A-8)	2014-04-28	2014-05-29	31	170/55	20 days	1	1								1							肝功能不全	1				1			1		1		1	1	150	8	2.9	116	3.4	61.4	27.2
371	1	male	34		1.cryptococcal meningitis 3.肝功能不全	1.cryptococcal meningitis3.支气管扩张4.肝血管瘤5.胆囊结石伴 chronic 性胆囊炎	Infection ward(9-3)	2014-04-30	2014-05-21	21	卧床	1months	1	1		1							1						SLE，狼疮性肾病		1			1		1		1		1		1	290	112	3.1	127	9.9	91.3	6.8
372	6	male	23		1.AIDS 2.cryptococcal meningitis 3.Pulmonary cryptococcosis...	1.AIDS2.cryptococcal meningitis3.Pulmonary cryptococcosis	Infection ward(9-3)	2014-05-19	2014-05-28	9
373	11	female	24		1.systemic lupus erythematosus 2. Lupus nephritis 3.cryptococcal meningitis 4....	1.systemic lupus erythematosus2. Lupus nephritis3.cryptococcal meningitis4.hypertension	Infection ward(6A-9)	2014-06-01	2014-06-23	22	172/65	1 weeks	1										1							1				1			1		1		1	0	250	10	2.7	117	0.9	40.4	32.6
374	6	male	38		1.AIDS 2.贫血 原因 yet to be investigated3.diabetes 4....	1.AIDS2.贫血3.diabetes4.cryptococcal meningitis5.巨细胞...	Infection ward(9-3)	2014-06-01	2014-06-23	22
375	13	male	49		1.AIDS 2.pulmonary infection	1.AIDS2.cryptococcal meningitis3.cryptococcosis4. pneumonia5.胸腔...	Infection ward(9-3)	2014-06-05	2014-07-16	41	170/67	20+ days								胸痛		1									1				1		1		1		1	0	190	0	3.7	128	5.9	59.4	34.8
376	2	male	54		1.右肺占位 tumor？tuberculosis？ inflammation ？2.鼻咽癌 放疗后	1.肺cryptococcosis2.鼻咽癌3.亚临床甲减	medical ward(10-3)	2014-06-09	2014-07-17	38
377	24	male	46		1.Pulmonary cryptococcosis 右肺2.肝脏 node 膈顶处肝脏小 node 3.血管瘤...	1.Pulmonary cryptococcosis2.肝脏 node 3.血管瘤	Respiratory Internal Medicine Ward(10-2)	2014-06-12	2014-06-19	7	168/65	2months								1		1									1				1		1		1		1						5.8	75	15.7
378	37	male	51		1.Pulmonary cryptococcosis	1.Pulmonary cryptococcosis	Respiratory Internal Medicine Ward(2-14)	2014-06-17	2014-06-24	7	175/65	10 days	1	1								1									1			1			1		1		1	1	290	10	0.8	110	6.8	80	12.4
379	8	male	61		1.cryptococcal meningitis 2.桥本thyroid炎 3.冠心病 4.Lungs感...	1.cryptococcal meningitis2.桥本thyroid炎3.冠心病4.pulmonary infection	Infection ward(6A-10)	2014-06-18	2014-07-10	22	卧床	1months	1				1						1	1							1				1		1		1		1	0	110	0	3.6	133	12.9	84	8.9
380	19	female	77		1.Pulmonary cryptococcosis 2.type 2 diabetes 3.阑尾切除 postoperative	1.Pulmonary cryptococcosis2.type 2 diabetes3.阑尾切除 postoperative 4.肝功能不全5.hypertension	Respiratory Internal Medicine Ward(2-14)	2014-06-25	2014-07-08	13	162/66.5	2months								背痛			1								1		1		1		1		1		1						6.5	72.5	21.9
381	25	female	38		1.Bilateral lung lesions Cryptococcal pneumonia consider	1.Pulmonary cryptococcosis	Respiratory Internal Medicine Ward(2-14)	2014-06-27	2014-07-01	4	156/39.2	half months								1		1					1				1				1		1		1		1						9.1	57.1	21.8
382	1	female	77		1.右肺占位 2.骨髓增生异常综合征	1.lung cancer postoperative 2.cryptococcosis3.骨髓增生异常综合征4.Bilateral thyroid node 5.肝...	Cadre Ward One Ward(6B-22)	2014-06-30	2014-07-14	14	173/55	1months		1	1	1							1							1				1			1		1		1	1	320	1	3	109	5.7	90.4	6.8
383	3	male	34		2.cryptococcal meningitis	2.AIDS3.cryptococcal meningitis4.pulmonary infection5. respiratory failure 6....	Infection ward(9-3)	2014-07-02	2014-08-04	33	168/58	1months					1					1									1				1		1		1		1	0	145	2	3.7	124	6.3	51.3	37.9
384	22	male	29		1.肺肉芽肿性炎 fungus Consider first	1.Pulmonary cryptococcosis	Respiratory Internal Medicine Ward(10-2)	2014-07-05	2014-07-14	9	188/74	1 weeks	1										1							1				1			1		1		1	1	340	6	2	119	9	86.9	7.5
385	9	male	28		1.AIDS 2.重症肝炎	1.AIDS2.Cryptococcal encephalitis3.肝门部病变4.梗阻性黄疸5...	Infection ward(9-3)	2014-07-14	2014-08-25	42	172/70.5	4months					1														1				1		1		1		1	1	48	2	3.8	125	4.9	53.1	29.6
386	21	male	42		1.nature of lung lesions to yet to be investigated fungus ？	1.Pulmonary cryptococcosis	Respiratory Internal Medicine Ward(2-14)	2014-07-24	2014-07-29	5	168/59	20+ days						1					1							1					1		1		1		1	0	84	1	3.9	112	9.7	79.9	12.2
387	21	male	44		1.耶氏肺孢子菌 pneumonia 2.AIDS ?	1.AIDS2.耶氏肺孢子菌 pneumonia3.肺cryptococcosis	Infection ward(9-3)	2014-07-28	2014-09-04	38	160/51	2months		1								1								1				1			1		1		1	1	120	3	2.9	120	3.4	50.3	47
388	13	male	35		1.AIDS 2.cryptococcal meningitis	1.AIDS2.cryptococcal meningitis3.银屑病	Infection ward(9-3)	2014-07-28	2014-09-05	39	173/卧床	20 days	1	1		1						1								1				1			1		1		1	1	255	15	2.5	122	4.1	73.3	15.1
389	22	male	62		1. diarrhea yet to be investigated 巨细胞viral肠炎？2.nephrotic syndrome 3.播散性隐...	1.infectious休克3.nephrotic syndrome4.Disseminated cryptococcosis5.肠炎	Infection ward(6A-9)	2014-07-30	2014-08-08	9
390	5	male	32		1.AIDS 2.cryptococcal meningitis 3.pulmonary infection	1.AIDS2.cryptococcal meningitis3.pulmonary infection	Infection ward(9-3)	2014-08-06	2014-09-23	48	162/65	9 days	1	1					1		1							1			1			1		1		1		1		1	290	140	2.8	108	9.8	84.5	12
391	11	female	24		1.cryptococcal meningitis 2.pulmonary infection Lupus nephritis3.心功能不全 ...	1.cryptococcal meningitis2.pulmonary infection3.心功能不全4.systemic lupus erythematosus5. chronic 性...	Infection ward(6A-10)	2014-08-19	2014-08-26	7
392	1	female	50		4.fever of unknown origin intracranial infection Consider first5.renal transplant state 6.renal hypertension...	1.cryptococcal meningitis2.renal transplant state3.renal hypertension4.Pulmonary nodule	Infection ward(6A-11)	2014-08-19	2014-09-19	31	167/64	10 days	1	1		1					1										1			1			1		1		1	1	260	25	3	125	7.8	77.8	12.2
393	7	male	41		1.cryptococcal meningitis 2.Hepatitis B肝炎 Virus carrying 者	1.cryptococcal meningitis2. intracranial hypertension 3.Chronic viral hepatitis B4.肝内胆管结石	Infection ward(6A-8)	2014-08-21	2014-09-23	33	174/70	4 days		1									1								1			1			1		1		1	0	280	0	4	126	8.9	63.6	30.3
394	27	male	43		1.Headache to be investigated Cryptococcal encephalitis Consider first2.Lungs阴影 肺cryptococcosis...	1.cryptococcosis	Infection ward(6A-12)	2014-09-01	2014-09-12	11	168/卧床	2months		1	1								1							1				1			1		1		1	1	＞400	8	1.1	125	4.2	57.3	34.2
395	1	male	33		1.cryptococcal meningitis 2.癫痫 继发性3.pulmonary infection Cryptococcus consider ...	1.Disseminated cryptococcosis2.AIDS3.pulmonary infection4.癫痫5.缺铁...	Infection ward(9-3)	2014-09-04	2014-10-27	53	165/56.5	1months								1		1									1				1		1		1		1						6.9	56.9	31.4
396	3	female	31		1.Pulmonary cryptococcosis	1.Pulmonary cryptococcosis2.syphilis	Respiratory Internal Medicine Ward(10-2)	2014-09-10	2014-09-11	1	172/64	2 weeks	1	1		1						1									1			1			1		1		1	0	250	930	0.2	116	4.3	80.7	12.2
397	15	male	38		1.cryptococcal meningitis combine meningitis2.Chronic viral hepatitis B 3.垂体...	1.cryptococcal meningitis2.esophageal ulcer 3.Chronic viral hepatitis B4. hyponatremia 5.垂...	Infection ward(6A-11)	2014-09-10	2014-09-26	16	160/56	20 days								1		1									1				1		1		1		1	0	200	0	3.5	119	9.5	76.8	17.1
398	2	female	46		1.pulmonary mycosis	1.Pulmonary cryptococcosis	Respiratory Internal Medicine Ward(2-16)	2014-09-11	2014-09-15	4	181/62	2months	1	1									1						hepatitis Bcirrhosis		1			1			1		1		1	1		175	1.7	115	9.6	80	14.2
399	51	male	56		1.cryptococcal meningitis 2.posthepatic cirrhosis Hepatitis B	1.cryptococcal meningitis2.posthepatic cirrhosis	Infection ward(6A-8)	2014-09-12	2014-09-19	7	155/58	10 days	1	1							1										1			1			1		1		1	1	＞400	100	1	103	13.1	89.7	6.7
400	3	female	41		1.cryptococcal meningitis 2.Teratoma Right Attachment Source	1.cryptococcal meningitis 2.Teratoma	Infection ward(6A-8)	2014-09-15	2014-10-13	28	165/67	40+ days	1				1						1	1					Rheumatoid Arthritis		1				1	1		1			1						4.5	87.2	8.5
401	9	female	64		1.fever of unknown origin 2. rheumatoid arthritis 3.hypertension 4.2 type Diabetes...	1.Enterococcus faecalis infection2.cryptococcosis3.pulmonary infection4.rheumatoid arthritis5.hypertension 6...	Infection ward(6A-8)	2014-09-23	2014-10-09	16	162/72	3 days		1		1					1				1						1			1			1		1		1	1	290	5	1.2	120	10.1	85.4	10.6
402	17	female	5		2. fungal infection deep 3. lymphadenitis deep	1.cryptococcosis2.hypokalemia	pediatric ward(5-2A)	2014-09-25	2014-10-11	16
403	10	female	43		1.cryptococcal meningitis	1.cryptococcal meningitis	Infection ward(6A-8)	2014-09-25	2014-10-01	6	152/56	1months+		1									1								1			1			1		1		1	0	210	19	3.9	124	14	84.4	11
404	30	female	49		1.viralmeningitis 2.hypertension 3. gastric polyp 4.Bipulmonary node	1.cryptococcal meningitis2.hypertension 3. gastric polyp 4.Bipulmonary node 5.generalized anxiety6....	Infection ward(6A-11)	2014-09-26	2014-10-23	27	158/51	half months		1		1						1									1		1	1			1		1		1	1	260	140	2.2	112	12.6	82.9	7.5
405	10	female	43		1.cryptococcosis Meninges encephalitis， pneumonia	1.cryptococcosis	Infection ward(6A-12)	2014-10-02	2014-10-23	21	158/64.5	10 days	1	1									1						SLE		1			1		1		1			1	1	280	5	2.5	126	6.8	87.1	6.9
406	22	female	51		1.cryptococcal meningitis 2.systemic lupus erythematosus 3. autoimmune Hemolysis ...	1.cryptococcal meningitis2.systemic lupus erythematosus3. autoimmune hemolytic anemia	Infection ward(6A-11)	2014-10-07	2014-10-30	23	175/65	7months		1		1							1	1	1			1			1			1		1		1		1		0	120	102	1.9	123	3.3	69.6	20.1
407	8	male	73		1.cryptococcal meningitis 2.Prostatic hyperplasia 3. lipoma Left occipital scalp	1.cryptococcal meningitis2.Prostatic hyperplasia3. lipoma 4.hypokalemia5.thyroid node	Infection ward(6A-9)	2014-10-10	2014-11-03	24
408	5	male	48		1.cryptococcal meningitis 2.pulmonary infection cryptococcosis？3.renal transplant postoperative ...	1.cryptococcal meningitis2.Pulmonary nodule3.renal transplant postoperative 4.gout5.type 2 diabetes6.胆...	Infection ward(6A-11)	2014-10-29	2014-11-24	26	159/62	7 days	1				1					1									1			1			1		1		1	0	190	500	2.3	121	8.2	80.6	15.5
409	10	female	46		1. encephalitis bacterial？viral？fungous？2.hypertension Level 1	1.Cryptococcal encephalitis2.hypertension Level 1	Infection ward(6A-10)	2014-10-31	2014-11-26	26	卧床	11 days		1		1						1					1				1			1		1		1			1	1	280	2	2.9	122	1.8	85.9	8.7
410	50	male	70		1.cryptococcal meningitis 2. Peripheral T cells lymphoma IVA phase 3. Rheumatic ...	1.cryptococcal meningitis2.Sepsis3. Peripheral T cells lymphoma4. Rheumatic heart disease 5.原...	Infection ward(6A-9)	2014-11-04	2014-12-03	29		20 days								1		1		1				1			1				1	1		1			1	0	200	0	4.3	134	8.4	70.9	19.2
411	50	male	41		1.Pulmonary cryptococcosis 2.renal transplant postoperative 3.hypertension 4.type 2 diabetes...	1.Pulmonary cryptococcosis2.renal transplant postoperative 3.hypertension 4.type 2 diabetes5.hepatitis B Virus carrying ...	Respiratory Internal Medicine Ward(2-14)	2014-11-04	2014-11-07	3	155/41	1months+	1	1		1						1		1					SLE		1			1		1		1		1		1	200	58	2.3	120	6.1	70.4	20.3
412	10	female	57		1.cryptococcal meningitis 2.systemic lupus erythematosus，累及器官或系统 3....	1.cryptococcal meningitis2.systemic lupus erythematosus，累及器官或系统3. Lupus nephritis4....	Infection ward(6A-9)	2014-11-21	2014-12-16	25	168/67	10 days								1			1								1				1		1		1		1	0	150	1	4.5	127	4.7	32.6	54.1
413	28	male	44		1.cryptococcosis 两肺多发	1.cryptococcosis	Respiratory Internal Medicine Ward(2-16)	2014-11-27	2014-12-03	6	175/71	half months+	1										1	1						1				1			1		1		1	1	70	20	3.1	121	4.2	69	16
414	16	male	44		1.AIDS 2.pulmonary infection 3.头痛 cryptococcal 脑...	1.AIDS2.cryptococcal meningitis3.pulmonary infection4.hypertension2 level 5...	Infection ward(9-3)	2014-12-01	2014-12-22	21	173/58	1 weeks		1								1							SLE		1			1		1		1			1	1	210	60	3.8	124	10.7	81.1	10.2
415	25	female	19		1.cryptococcal meningitis 2.systemic lupus erythematosus 3. Lupus nephritis	1.cryptococcal meningitis2.systemic lupus erythematosus3.低蛋白血症4.hypokalemia	Infection ward(6A-11)	2014-12-09	2014-12-16	7	161/61	20+ days	1	1		1			1			1									1			1			1		1		1	1	280	18	0.7	117	7.9	64.8	15
416	26	male	39		1.cryptococcal meningitis 2.Cryptococcal encephalitis 3.pulmonary infection	1.cryptococcal meningitis2.Cryptococcal encephalitis3.pulmonary infection4.左肾萎缩5.肾结石	Infection ward(6A-11)	2014-12-11	2015-01-07	27	163/39	1months+	1			1		1					1	1				1			1			1		1		1		1		1	340	60	2.4	108	4.7	80.9	11.6
417	5	male	21		1.nephrotic syndrome 微小病变 type 2.Pulmonary cryptococcosis 3.hypertension3 level 极...	1.nephrotic syndrome2.Pulmonary cryptococcosis3.hypertension3 level	Respiratory Internal Medicine Ward(2-14)	2014-12-15	2014-12-17	2
418	1	female	53		1. community acquired pneumonia， Non critical 2. pericardial effusion yet to be investigated 3.renal transplant state...	2.cryptococcosis3.renal transplant state4.EB virus infection 5.giant cell virus infection 6.缺血性...	Infection ward(6A-11)	2014-12-17	2015-01-15	29	171/55	20+ days		1		1						1									1			1			1		1		1	1	300	165	1.02	115.5	8.3	75.4	12.6
419	29	male	36		1.cryptococcal meningitis 2. hyponatremia 3.hepatitis B Virus carrying 者	1.cryptococcal meningitis2. hyponatremia 3.hepatitis B Virus carrying 者	Infection ward(6A-12)	2014-12-18	2014-12-26	8	170/54	2months+	1									1								1				1			1		1		1	1	150	3	1.4	122	4.1	57.4	33.2
420	15	male	29		1.AIDS 2.鹅口疮 3.pulmonary infection	1.AIDS2.cryptococcal meningitis3.癫痫4.pulmonary infection5.鹅口...	Infection ward(9-3)	2014-12-20	2015-01-23	34	156/卧床	20+ days		1					1				1						autoimmune hepatopathy		1			1			1	1		1		1	360	180	0.5	115	10.3	81.4	10.6
421	17	female	70		1.cryptococcal meningitis 2.hypertension 3.Autoimmune Liver Disease 4.颈...	1.cryptococcal meningitis2. autoimmune cirrhosis3.间质性肺病4.干燥综合征5....	Infection ward(6A-11)	2014-12-25	2015-01-07	13	卧床	20+ days	1	1					1			1									1			1			1		1		1						12.6	92	4
422	25	male	77		1.cryptococcal meningitis 2.hypertension 3. chronic 性支气管炎 4.输尿...	1.cryptococcal meningitis2.cerebral hernia3.hypertension 4. chronic 性支气管炎5.输尿管结石	Surgical Intensive Care Unit(6A-4)	2014-12-26	2014-12-30	4	卧床	1months		1		1													SLE，Cryptococcemia		1			1		1		1			1	1	400	10	0.8	113	9.4	94.9	3.3
423	36	female	62		1.cryptococcal meningitis 2.systemic lupus erythematosus 3.hypertension	1.cryptococcal meningitis2.Sepsis3.systemic lupus erythematosus4.hypertension 5. cerebral infarction 6...	Infection ward(6A-10)	2015-01-01	2015-01-26	25	162.5/63	1months	1									1									1				1		1		1		1	0	80	0	3.3	126	9.5	70.2	21.8
424	27	female	41		1.pulmonary mycosis Cryptococcus consider	1.Pulmonary cryptococcosis	Respiratory Internal Medicine Ward(2-14)	2015-01-02	2015-01-07	5	170/80	1months		1							1			1							1			1			1		1		1	0	265	160	2.8	117	8.7	65.2	28
425	11	male	25		1.AIDS 2.头痛 Cryptococcal encephalitis？tuberculosis Meninges...	1.AIDS2.Cryptococcal encephalitis3.皮下 node 4.器质性脑病5....	Infection ward(9-3)	2015-01-04	2015-01-29	25
426	20	male	67		1.cryptococcal meningitis 2.hypertension 2 level 3.Prostatic hyperplasia伴结石 ...	1.cryptococcal meningitis2.hypertension 2 level 3.type 2 diabetes4.Prostatic hyperplasia伴结石	Infection ward(6A-12)	2015-01-12	2015-02-05	24
427	3	male	60		1.fever of unknown origin infectious？免疫性？neoplastic？2.type 2 diabetes 3.肾...	1.cryptococcal meningitis2.type 2 diabetes3.肾结石4.颈动脉钙化斑5.肝血管瘤...	Infection ward(6A-12)	2015-01-12	2015-01-28	16
428	21	male	45		1.左pulmonary mycosis	1.左Pulmonary cryptococcosis	Respiratory Internal Medicine Ward(2-14)	2015-01-15	2015-01-23	8
429	39	male	54		1.cryptococcal meningitis 2.滤泡细胞lymphoma IVA	1.cryptococcal meningitis2.滤泡细胞lymphoma	Infection ward(6A-11)	2015-01-19	2015-02-18	30
430	8	male	47		1.Pulmonary cryptococcosis	1.Pulmonary cryptococcosis	Respiratory Internal Medicine Ward(2-14)	2015-01-22	2015-01-28	6
431	3	male	34		1.renal transplant state 2.肾盂肾炎	1.cryptococcal meningitis2.renal transplant state3. renal insufficiency 4.肺cryptococcosis5.电解...	Infection ward(6A-8)	2015-01-23	2015-02-17	25
432	7	male	59		1.乏力 yet to be investigated myasthenia gravis？ polymyositis ？周围神经病变？2.复视...	1.胸腺瘤2.myasthenia gravis3.Pulmonary cryptococcosis	Geriatric Department(6B-22)	2015-01-24	2015-02-25	32
433	1	male	76		1.fever of unknown origin 尿路 infection ？intracranial infection？血管炎？2.血管炎 3.间...	1.cryptococcal meningitis2.吸入性 pneumonia3.间质性肺病4.肺血管炎5.diabetes神...	Infection ward(6A-8)	2015-01-28	2015-02-16	19
434	35	female	45		1.Pulmonary cryptococcosis 2.fatty liver	1.Pulmonary cryptococcosis2.fatty liver	Respiratory Internal Medicine Ward(2-16)	2015-02-02	2015-02-09	7
435	-1	male	52		1.cryptococcal meningitis	1.cryptococcal meningitis	Infection ward(6A-10)	2015-02-10	2015-02-13	3
436	26	male	20		1.Pulmonary cryptococcosis	1.cryptococcosis	Respiratory Internal Medicine Ward(10-2)	2015-02-12	2015-02-26	14
437	11	male	57		1.AIDS 2.弥漫大B细胞lymphoma	1.AIDS2.lymphoma3.肺cryptococcosis	Infection ward(9-3)	2015-02-23	2015-02-27	4
438	30	male	37		1.Bilateral lung lesions 多发，肉芽肿性病变首考，tumor Wait to confirm	1.Bilateral lung lesions2.cryptococcal meningitis	Respiratory Internal Medicine Ward(2-16)	2015-02-25	2015-03-10	13
439	16	male	29		1.AIDS 2.pulmonary infection 3.鹅口疮	1.AIDS2.cryptococcal meningitis3.口腔念珠菌 infection	Infection ward(9-3)	2015-03-02	2015-04-03	32
440	11	male	36		1.AIDS 2.pulmonary infection 3.耶氏肺孢子菌 pneumonia...	1. respiratory failure 2.耶氏肺孢子菌 pneumonia3.AIDS4.肺 Cryptococcus 感...	Infection ward(9-3)	2015-03-02	2015-04-07	36
441	3	male	58		1.AIDS 2.Central infection 3.电解质代谢紊乱	1.AIDS2.cryptococcal meningitis3.Pulmonary cryptococcosis4.恶液质5....	Infection ward(9-3)	2015-03-12	2015-04-17	36
442	19	female	50		1.pulmonary infection Cryptococcal Consider first2.hypertension Level 1 3.diabetes	1.肺cryptococcosis2.hypertension Level 13.diabetes	Respiratory Internal Medicine Ward(10-2)	2015-03-13	2015-03-23	10
443	10	female	42		1.左Pulmonary nodule tuberculosis？lung cancer？	1.左Pulmonary nodule2.肺cryptococcosis	medical ward(10-3)	2015-03-17	2015-04-02	16
444	9	male	45		1.Pulmonary cryptococcosis 2.胆囊结石	1.Pulmonary cryptococcosis2.胆囊结石	Respiratory Internal Medicine Ward(10-2)	2015-03-20	2015-03-25	5
445	53	female	50		1.renal transplant state 2.肾性贫血 3.renal hypertension 4.肾功能异常...	1.renal transplant state2.肾性贫血3.renal hypertension4.肾功能异常5. cryptococcal Meninges...	Infection ward(6A-11)	2015-03-26	2015-05-11	46
446	6	male	50		1.cryptococcal meningitis 2.AIDS 3.fever of unknown origin	1.cryptococcal meningitis2.AIDS	Infection ward(9-3)	2015-04-01	2015-05-05	34
447	27	female	79		1.Tuberculous meningitis 2.精神分裂症 3.pulmonary infection	1.cryptococcal meningitis2.精神分裂症3.pulmonary infection	Infection ward(9-4)	2015-04-16	2015-04-23	7
448	30	female	73		1.Tuberculous meningitis consider 2.type 2 diabetes 3.冠状动脉粥样硬化性...	1.cryptococcal meningitis2.type 2 diabetes3.冠状动脉粥样硬化性心脏病4. cerebral infarction	Infection ward(6A-6)	2015-04-17	2015-05-07	20
449	35	male	47		1.Lungs占位 肺隐球 infection ？lung cancer？pulmonary tuberculosis？2.左肺占位 肉芽肿...	1.Pulmonary cryptococcosis2.左肺占位3.type 2 diabetes	Respiratory Internal Medicine Ward(2-14)	2015-04-22	2015-04-28	6
450	28	female	48		1.cryptococcosis Meninges encephalitis2. Rheumatic 关节炎 3.焦虑症	1.Cryptococcal encephalitis2. rheumatoid arthritis 3.焦虑症	Infection ward(6A-12)	2015-04-25	2015-05-11	16
451	20	male	34		1.cryptococcal meningitis ?2.Chronic viral hepatitis B 3.肾结石 4...	1.cryptococcal meningitis2.Chronic viral hepatitis B3.肾结石4.结肠息肉	Infection ward(6A-6)	2015-04-27	2015-07-02	66
452	B10	male	53		1.fever of unknown origin Tuberculous meningitis2.renal transplant postoperative CKD 3 phase 3.病...	1.肝功能Decompensation2. pneumonia3. respiratory failure 4.急性左心衰竭5.Hepatitis Bviral肝...	ICU ward(5-3)	2015-04-29	2015-05-21	22
453	50	female	39		1.intracranial infection cryptococcosis2.结缔组织病 3.血小板减少症	1.cryptococcal meningitis2.结缔组织病3.血小板减少症	Infection ward(6A-8)	2015-05-02	2015-06-01	30
454	32	male	71		1.cryptococcal meningitis 2.Schistosomiasis liver disease	1.cryptococcal meningitis2. Schistosomiasis cirrhosis	Infection ward(6A-11)	2015-05-07	2015-05-18	11
455	5	male	43		1. diarrhea yet to be investigated infectious？neoplastic？2.Headache to be investigated infectious？	1.cryptococcal meningitis2.AIDS	Infection ward(9-3)	2015-05-07	2015-05-13	6
456	3	male	18		1.Pulmonary cryptococcosis	1.Pulmonary cryptococcosis	Respiratory Internal Medicine Ward(2-16)	2015-05-07	2015-05-14	7
457	60	male	71		1. cerebral infarction ?2.Intracranial space occupying lesions ?3.pulmonary tuberculosis	1.cryptococcosis3. cerebral infarction 4. pneumonia5.Intracranial space occupying lesions	Infection ward(6A-12)	2015-05-15	2015-06-08	24
458	9	female	58		1.cryptococcal meningitis 2. rheumatoid arthritis	1.cryptococcal meningitis2. rheumatoid arthritis	Infection ward(6A-8)	2015-05-25	2015-06-15	21
459	38	male	51		1. disturbance of consciousness viral encephalitis？Tuberculous meningitis？急性 cerebral infarction ？2. chronic 性...	1.cryptococcal meningitis2.chronic kidney disease3.左肺占位4.hypertension 5. Venous thrombosis...	Infection ward(6A-6)	2015-05-26	2015-07-09	44
460	26	male	61		1.meningitis 2.nephrotic syndrome 3.diabetes 4.膜性肾病 5. chronic ...	1.cryptococcal meningitis2.nephrotic syndrome3.膜性肾病4.type 2 diabetes5. chronic 性Hepatitis B...	Infection ward(6A-6)	2015-05-27	2015-06-12	16
461	23	male	76		1.胃癌 postoperative 复发 postoperative ，化疗后，射频后，放射性粒子植入后，I...	1.胃癌 postoperative 复发2.hypertension 2 level 3.糖耐量异常4.Prostatic hyperplasia伴结石5....	Geriatric Department(6B-22)	2015-05-27	2015-06-19	23
462	33	female	80		1.发热 infectious？neoplastic？免疫性？2.hypertension 3.thyroid切...	4.Disseminated cryptococcosis5.hypertension 6.双肾多发性囊肿7.肾结石8.thyroid切...	Infection ward(6A-12)	2015-06-06	2015-07-10	34
463	6	male	33		1.AIDS ?2.pulmonary infection PCP？3.颅内感...	1.AIDS2.cryptococcal meningitis4.pulmonary infection5.鹅口疮	Infection ward(9-3)	2015-06-13	2015-06-14	1
464	10	male	44		1.Central infection cryptococcal meningitis？Tuberculous meningitis？	1.cryptococcal meningitis2.胆囊息肉3.thyroid node 4.两Pulmonary nodule	Infection ward(6A-12)	2015-06-29	2015-07-17	18
465	26	female	77		1.fever of unknown origin intracranial infection？2.陈旧性pulmonary tuberculosis 3.hypertension	1.cryptococcal meningitis2.陈旧性pulmonary tuberculosis3.hypertension	Infection ward(6A-11)	2015-07-20	2015-07-28	8
466	3	male	37		1.AIDS ?2.cryptococcal meningitis	1.AIDS2.cryptococcal meningitis	Infection ward(9-3)	2015-07-23	2015-09-14	53
467	50	male	67		1.Cryptococcal encephalitis 2.hypertension3 level 继发性？	1.cryptococcal meningitis	Infection ward(6A-9)	2015-07-27	2015-08-24	28
468	21	female	64		1.AIDS 2.肺cryptococcosis 3.帕金森病 4...	1.AIDS2.肺cryptococcosis3.帕金森病4.白内障 postoperative	Infection ward(9-3)	2015-07-27	2015-07-30	3
469	1	female	46		1.Pulmonary cryptococcosis	1.Pulmonary cryptococcosis	Respiratory Internal Medicine Ward(10-2)	2015-07-28	2015-08-06	9
470	1	male	62		1.cryptococcal meningitis 2.Hepatitis B cirrhosis	1.cryptococcal meningitis2.Hepatitis B cirrhosis3.器质性精神障碍4. herpes zoster	Infection ward(6A-8)	2015-07-28	2015-09-04	38
471	1	male	22		1.AIDS 2.cryptococcal meningitis	1.AIDS2.cryptococcal meningitis3.pulmonary infection4.单纯疱疹病毒...	Infection ward(9-3)	2015-08-05	2015-10-13	69
472	30	male	30		1.intracranial infection cryptococcal meningitis？Tuberculous meningitis？viralmeningitis？	1.cryptococcal meningitis2.肺占位3.肾结石4.肝功能不全	Infection ward(6A-12)	2015-08-10	2015-09-18	39
473	15	male	26		1.Pulmonary cryptococcosis	1.Pulmonary cryptococcosis	Respiratory Internal Medicine Ward(10-2)	2015-08-12	2015-08-17	5
474	39	male	58		1. chronic 性肾小球肾炎 2.chronic kidney disease-V phase 3.renal transplant state 4...	1.cryptococcosis2. chronic 性肾小球肾炎3.chronic kidney disease-V phase 4.renal transplant state5.肾...	Infection ward(6A-10)	2015-08-18	2015-09-22	35
475	29	male	51		1.chronic kidney disease-V phase 2.renal transplant state 3.肾性贫血 4.肾性...	1.chronic kidney disease-V phase 2.renal transplant state3.肾性贫血4.renal hypertension5. Cryptococcus ...	Infection ward(6A-9)	2015-08-21	2015-09-24	34
476	8	male	48		1.nephrotic syndrome 膜性肾病1 phase 2.chronic kidney disease1 phase 3. cryptococcal ...	1.nephrotic syndrome2.cryptococcal meningitis3.steroid diabetes4.hypokalemia5.Lungs...	Kidney Disease WardSecond Ward(6B-9)	2015-08-25	2015-10-14	50
477	32	female	61		1.Pulmonary cryptococcosis 2.thyroid node left	1.Pulmonary cryptococcosis2.cryptococcal meningitis3.thyroid node	Respiratory Internal Medicine Ward(2-14)	2015-08-31	2015-09-02	2
478	4	male	54		1.胸腔积液 yet to be investigated tumor？tuberculosis？ inflammation ？2.鼻咽癌 非角化性癌，...	1.恶性胸腔积液2.Pulmonary nodule3.鼻咽癌4.Pulmonary cryptococcosis	Respiratory Internal Medicine Ward(10-2)	2015-09-14	2015-09-23	9
479	12	male	52		1.fever of unknown origin Central infection可能2.hypertension Level 1 3.fatty liver	1.AIDS2.cryptococcal meningitis3.hypertension Level 1	Infection ward(9-3)	2015-09-15	2015-10-16	31
480	22	male	44		1.intracranial infection cryptococcosis？2.hypertension2 level 3.type 2 diabetes 4...	1.cryptococcal meningitis2.hypertension2 level 3.type 2 diabetes4.鞍区占位	Infection ward(6A-9)	2015-09-23	2015-10-23	30
481	28	female	47		1.intracranial infection 病毒？ Cryptococcus tuberculosis？2.hypertension	1.cryptococcal meningitis2.hypertension	Infection ward(6A-6)	2015-10-03	2015-10-28	25
482	30	male	79		1.Cryptococcal encephalitis	1.Cryptococcal encephalitis2.胆囊炎3.胆囊结石4.Prostatic hyperplasia伴结石	Infection ward(6A-9)	2015-10-12	2015-11-17	36
483	19	male	65		1.AIDS 2.cryptococcosis 3.syphilis 中枢	1.AIDS2.cryptococcosis3.神经syphilis4. chronic 性支气管炎伴肺气...	Infection ward(9-3)	2015-10-14	2015-10-28	14
484	20	male	33		1.肺cryptococcosis	1.肺cryptococcosis	Respiratory Internal Medicine Ward(2-16)	2015-10-20	2015-10-26	6
485	10	male	33		1.cryptococcal meningitis	1.AIDS2.cryptococcal meningitis	Infection ward(9-3)	2015-10-20	2015-12-23	64
486	53	female	36		1.cryptococcal meningitis	1.cryptococcal meningitis	Infection ward(6A-8)	2015-10-21	2015-11-20	30
487	5	male	29		1.intracranial infection cryptococcal meningitis？Tuberculous meningitis？2.获得性免疫缺...	1.cryptococcal meningitis2.AIDS3.颈椎病	Infection ward(9-3)	2015-10-21	2015-12-18	58
488	37	male	53		1.fever of unknown origin intracranial infection？沙门氏菌 infection ？	1.cryptococcal meningitis2.hypertension 3.冠心病	Infection ward(6A-6)	2015-10-26	2015-11-25	30
489	3	female	47		1.pulmonary infection Cryptococcus 首 consider	1.肺cryptococcosis	Respiratory Internal Medicine Ward(2-16)	2015-10-27	2015-11-03	7
490	13	male	31		1.AIDS 2.cryptococcal meningitis	1.AIDS2.cryptococcal meningitis	Infection ward(9-3)	2015-10-28	2015-11-27	30
491	1	male	43		1.cryptococcosis	1.Pulmonary cryptococcosis2.viral hepatitis B	Respiratory Internal Medicine Ward(10-2)	2015-11-03	2015-11-11	8
492	11	male	63		1.Pulmonary cryptococcosis 2.hypertension	1.Pulmonary cryptococcosis2.hypertension	Respiratory Internal Medicine Ward(2-16)	2015-11-11	2015-11-16	5
493	20	male	50		1.AIDS 2. lymph node增大	1.AIDS2.阴茎溃疡3.cryptococcosis4. lymph node增大5.高血...	Infection ward(9-3)	2015-11-21	2015-12-14	23
494	10	male	33		1.nature of lung lesions to yet to be investigated lymphoma？tumor？免疫结缔组织病？ pneumonia？2...	1.Pulmonary cryptococcosis2.type 2 diabetes3.通气功能障碍	Respiratory Internal Medicine Ward(2-16)	2015-12-07	2015-12-16	9
495	50	male	19		1.cryptococcal meningitis	1.cryptococcal meningitis	Infection ward(6A-11)	2015-12-08	2015-12-11	3
496	50	male	65		1.pulmonary infection 右肺	1.肺cryptococcosis	Respiratory Internal Medicine Ward(2-16)	2015-12-14	2015-12-24	10
497	19	male	20		1.AIDS 2.cryptococcosis 3.cryptococcal meningitis ...	1.AIDS2.cryptococcal meningitis3.肺cryptococcosis4. fungus 败血...	Infection ward(9-3)	2015-12-15	2016-01-11	27
498	2	male	52		1.nature of lung lesions to yet to be investigated cryptococcosis Consider first	1.Pulmonary cryptococcosis	Respiratory Internal Medicine Ward(2-16)	2015-12-16	2015-12-24	8
499	23	female	48		1.Pulmonary cryptococcosis	1.Pulmonary cryptococcosis	Respiratory Internal Medicine Ward(2-16)	2015-12-21	2015-12-30	9
500	16	male	68		1.cryptococcal meningitis 2.膜性肾病 3.steroid diabetes 4.蜂...	1.cryptococcal meningitis2.膜性肾病3.steroid diabetes4.蜂窝织炎	Infection ward(6A-10)	2015-12-21	2016-01-09	19
501	9	female	54		1.meningitis cryptococcal ？tuberculosis ？viral？2.type 2 diabetes 3.高...	1.cryptococcal meningitis2.type 2 diabetes3.hypertension	Infection ward(6A-10)	2015-12-29	2016-01-28	30
502	6	male	37		1.cryptococcal meningitis 2.肺空洞 Cryptococcal Consider first，tuberculosis？3.获...	1.AIDS2.cryptococcal meningitis3.pulmonary infection4.肺空洞5.肾...	Infection ward(9-3)	2016-01-06	2016-02-17	42	170/47.5	15	1	1						syphilis		1（空洞）								1			CSF找到 Cryptococcus	1			1		1		1		120	1	3.2	111	33.8	79	10.2
503	5	male	49		1.cryptococcosis 2.Cryptococcal encephalitis 3.hypertension 4.hepatitis B病毒携...	1.cryptococcosis2.Cryptococcal encephalitis3.hypertension 4.hepatitis B Virus carrying 者5.癫痫	Infection ward(6A-9)	2016-01-06	2016-02-05	30	卧床/68	60	1	1	1	1				1									hepatitis B/高血压		1		血培养提示 Cryptococcus	1			1		1		1		＞400				13.1	85.5	6.5
504	3	male	30		1.fever of unknown origin virus infection ？2.食管炎 霉菌性4.白细胞减少 5...	1.AIDS3.Disseminated cryptococcosis4.fungous食管炎5.胸腔积液...	Infection ward(9-3)	2016-01-06	2016-02-17	42	175/47	4	1							头晕		1								1			CSF找到 Cryptococcus	1			1		1		1		280	1	3.8	113	4.7	85.2	7.4
505	10	male	35		1.肺cryptococcosis	1.肺cryptococcosis2.fatty liver	Respiratory Internal Medicine Ward(2-14)	2016-01-07	2016-01-13	6	174/75	1										1									1		肺穿刺病理提示 Cryptococcus		1		1		1		1						7.1	52.9	38.8
506	1	male	63		1.fever of unknown origin cryptococcal meningitis Consider first2.cirrhosis（失代偿）	1.cryptococcal meningitis2.cirrhosis（失代偿）3.肝性脑病4.pulmonary infection5.胆囊...	Infection ward(6A-10)	2016-01-07	2016-01-27	20	160/95	30	1	1							1										1		CSF培养提示 Cryptococcus 0	1			1		1		1		250	140	1.72	117.5	2.3	82.2	12.6
507	2	male	63		2.右Pulmonary nodule tumor？ infection ？tuberculosis？3.type 2 diabetes 4.hypertension ...	1.Pulmonary cryptococcosis2.type 2 diabetes3.hypertension 3 level 4.冠状动脉粥样硬化性心脏...	Cadre Ward One Ward(6B-22)	2016-01-12	2016-02-05	24	165/61.5	6										1							高血压		1				1		1		1		1						5.5	57.8	30.1
508	35	male	26		1.Central infection Cryptococcus Meninges encephalitis？2.神经纤维瘤 3.蛛网膜囊肿...	1.cryptococcal meningitis2.神经纤维瘤3.蛛网膜囊肿	Infection ward(6A-9)	2016-01-21	2016-03-07	46	163/50	270		1						乏力	1										1		CSF培养到 Cryptococcus	1			1		1		1		180	350	0.7	102	10.2	76.6	16.8
509	19	male	53		1.cryptococcal meningitis 2.Lungs占位	1.cryptococcal meningitis2.Lungs占位	Infection ward(6A-6)	2016-01-22	2016-02-29	38	179/75	15	1	1		1						1									1		CSF找到 Cryptococcus	1			1		1		1		200	300	110	2.3	9.5	85	8.3
510	6	female	54		1.cryptococcal meningitis 2.systemic lupus erythematosus 3. Lupus nephritisV type	1.cryptococcal meningitis2.systemic lupus erythematosus3. Lupus nephritisV type 4.diabetes5.高...	Infection ward(6A-9)	2016-01-27	2016-02-26	30	160/65	180	1	1							1								SLE/SLE肾炎		1		CSF找到 Cryptococcus	1		1		1			1		260	1	2.7	121	3.3	81.3	13.2
511	10	male	65		1.fever of unknown origin Central infection？2.hypertension	1.cryptococcal meningitis2.hypertension	Infection ward(6A-10)	2016-01-28	2016-03-01	33	160/55	30	1	1		1					1								高血压		1		CSF找到 Cryptococcus	1			1		1		1		350	1	0.5	111	11.6	86.4	7.3
512	A5	male	72		1.cryptococcal meningitis 2.nephrotic syndrome 3.viral hepatitis B	1.cryptococcal meningitis2.nephrotic syndrome3.viral hepatitis B	ICU ward(5-3)	2016-02-01	2016-02-23	22	卧床	10	1						1	右下肢无力	1								nephrotic syndrome/hepatitis B		1		CSF找到 Cryptococcus	1		1		1		1		1	450	18	0.8	116	14	91.3	4.4
513	2	male	35		1.AIDS 2.Central infection 隐脑？Tuberculous meningitis？3.口腔...	1.AIDS2.cryptococcosis3.cryptococcal meningitis4.口腔 fungal infection ...	Infection ward(9-3)	2016-02-02	2016-03-08	35	营养正常	7	1	1		1						1								1			CSF找到 Cryptococcus	1			1		1		1		＞400	130	2.3	113	3.7	68.5	21
514	8	male	71		1.fungal meningitis	1.cryptococcal meningitis2.pulmonary infection3.动脉硬化4.老年性脑病5.肝内钙化点	Infection ward(6A-12)	2016-02-12	2016-02-26	14	165/40	7		1		1							1								1		CSF找到 Cryptococcus	1			1		1		1		＞450	10	114	0.3	2.5	88.2	7.5
515	15	male	61			1.右Pulmonary cryptococcosis2.房颤3.胃tumor	General Thoracic Surgery Ward(5-5)	2016-02-18	2016-03-04	15	176/83	30										1							房颤		1		手术病理提示 Cryptococcus		1		1		1		1						5.4	64.2	25.6
516	10	male	38		1.intracranial infection 隐脑 Consider first2.AIDS 3.急性...	1.cryptococcal meningitis2.cerebral hernia3.AIDS4.呼吸心跳骤停5....	Infection ward(9-3)	2016-02-20	2016-02-22	2	176/卧床	18	1	1		1			1		1									1			CSF找到 Cryptococcus	1			1		1		1		＞400	0	1.7	114	5.1	83.1	11.8
517	5	female	38		1.肺cryptococcosis	1.肺cryptococcosis	Respiratory Internal Medicine Ward(2-14)	2016-03-01	2016-03-10	9	160/39.5	30					1					1									1		肺穿刺病理提示 Cryptococcus		1		1		1		1						4.8	59.6	33.5
518	-9	male	42		1.nature of lung lesions to yet to be investigated 左肺，多发， Cryptococcus tumor？tuberculosis？	1.Pulmonary cryptococcosis2. abnormal liver function	Respiratory Internal Medicine Ward(2-14)	2016-03-10	2016-03-29	19	174/72	15					1					1									1		1		1		1		1		1						7.7	69	22.5
519	10	female	56		1.tuberculosis Meninges encephalitis 2.脑积水 3.pulmonary tuberculosis	1.cryptococcal meningitis2.脑积水3.pulmonary infection	EICU	2016-03-11	2016-03-25	14	卧床	150		1					1	记忆力下降			1								1		CSF找到 Cryptococcus	1			1		1		1			200	0.3	115	10.5	78.7	14.6
520	6	male	32		1.AIDS 2.cryptococcal meningitis 3. intracranial hypertension ...	1.AIDS2.cryptococcal meningitis3.viral hepatitis5.EB病毒感...	Infection ward(9-3)	2016-03-18	2016-04-07	20	180/65	150		1		1					1									1			CSF找到 Cryptococcus	1			1		1		1		＞400	17	3.3	118	3.2	73.7	24.8
521	7	female	60		1.多发性骨髓瘤 L轻链 IIIA phase 2.hypertension	1.多发性骨髓瘤2.Pulmonary cryptococcosis3.hypertension 4.乳房 node 5.thyroid node 6...	Bone Marrow Transplantation Center Ward(2-19)	2016-03-22	2016-04-05	14	167/65	30										1				多发性骨髓瘤/化疗中			高血压		1		1		1		1		1		1						2.8	76.1	19.9
522	23	male	67		1.肺cryptococcosis 2.hypertension 2 level 3.颈动脉硬化 4.肝囊...	1.肺cryptococcosis2.hypertension 2 level 3.颈动脉硬化4.Hepatic cyst5.Prostatic hyperplasia	Respiratory Internal Medicine Ward(10-2)	2016-04-05	2016-04-15	10	172/71	60					1					1							高血压		1				1		1		1		1						10.4	68.3	20.9
523	1	male	48		1.中医： 癥瘕 气滞血瘀2.肝癌 postoperative 介入、射频 postoperative 3.肺...	1.肝癌 postoperative 2.肺转移癌3.Hepatitis B cirrhosis4.Pulmonary cryptococcosis	Traditional Chinese Medicine Ward(6A-6)	2016-04-06	2016-04-18	12	170/56	30										1				肝癌/肺转移			hepatitis B		1		CT提示 Cryptococcus		1		1		1		1						2.4	65.2	25.3
524	55	male	35		1.chronic kidney disease-V phase 2.肾性贫血 3.renal hypertension	1.chronic kidney disease-V phase 2.肾性贫血3.renal hypertension4.左前臂自体动-静脉内...	Kidney Disease WardSecond Ward(6B-9)	2016-04-20	2016-05-27	37	157/53	2					1		1				1						chronic kidney disease/高血压		1		1	1		1		1		1			210	20	3	124	12.6	98.1	0.9
525	37	male	67		1.intracranial infection Tuberculous meningitis？cryptococcal meningitis？化脓性meningitis?2...	1.cryptococcal meningitis3.血吸虫病个人史	Infection ward(6A-10)	2016-04-28	2016-05-13	15	170/60	50	1	1		1				视物模糊		1（胸腔积液）									1		CSF培养到 Cryptococcus	1			1		1		1		200	200	1.6	101	3.5	82.3	11.3
526	18	female	54		1.cryptococcal meningitis 2.renal hypertension 3.renal transplant postoperative 4.子宫...	1.cryptococcal meningitis2.renal hypertension3.renal transplant postoperative 4.子宫次全切除 postoperative	Infection ward(6A-10)	2016-04-29	2016-05-16	17	158/45	60		1		1					1							renal transplant	高血压		1		CSF找到 Cryptococcus	1		1		1		1			390	9	1.09	113	6.9	63.8	27.1
527	10	male	38		1.myasthenia gravis 胸腺瘤，A type 交界性2.胸腺瘤 postoperative 3.Hepatitis B...	1.cryptococcal meningitis2.Cryptococcal encephalitis3.viral hepatitis B4.cryptococcosis5.重...	Infection ward(6A-11)	2016-05-03	2016-05-30	27	卧床	60		1			1			咯血		1				胸腺瘤			重症肌无力		1		1	1		1		1			1		450	19	2.9	130	13.5	87.7	6.7
528	11	male	51		1.cryptococcal meningitis 2.hypertension 3.左耳聋	1.cryptococcal meningitis2.hypertension 3.左耳聋	Infection ward(6A-8)	2016-05-09	2016-06-06	28	160/60	20				1				头晕		1							高血压		1		1	1			1		1			1	270	30	1.8	103	8.3	75.2	13.8
529	8	female	25		1.AIDS 2.cryptococcal meningitis 3.肾结石 左...	1.AIDS2.cryptococcal meningitis3.肾结石4.肺纤维增殖灶5...	Infection ward(9-3)	2016-05-09	2016-06-16	38	170/71	15		1		1					1									1			CSF找到 Cryptococcus	1			1		1		1						5.7	76.4	19
530	28	female	50		1.cryptococcal meningitis 2.hypertension	1.cryptococcal meningitis2.hypertension	Infection ward(6A-6)	2016-05-10	2016-06-03	24	160/72	30	1	1		1						1							高血压		1		1	1			1		1		1		400	7	3.7	105	8.8	83.9	9.4
531	21	male	46		1.AIDS 2.pulmonary infection PCP Consider first3.乙...	1.AIDS2.卡氏肺孢子菌 pneumonia3.Hepatitis B cirrhosis4.肺 Cryptococcus ...	Infection ward(9-3)	2016-05-16	2016-06-07	22	170/51	90	1										1						hepatitis B	1			1		1		1		1		1						2.2	36.4	25
532	13	male	27		1.cryptococcal meningitis 2.胃炎	1.AIDS2.cryptococcal meningitis3.pulmonary infection4.癫痫5.胃炎	Infection ward(9-3)	2016-05-16	2016-09-14	121	172/55	9	1	1	1						1								syphilis	1			CSF找到 Cryptococcus	1			1		1		1	1	350	2	4.2	120	5.7	79.2	8.5
533	2	male	26		1.AIDS 2.Disseminated cryptococcosis Cryptococcus Sepsis，...	1.AIDS2. intracranial hypertension 3.Disseminated cryptococcosis4. cerebral infarction 5....	Infection ward(9-3)	2016-05-16	2016-05-18	2	176/47.7	3	1	1	1		1		1											1			血培养/CSF培养提示 Cryptococcus	1			1		1		1			450	1.09	114.9	3.4	91.6	5.8
534	56	male	57		1.lung cancer postoperative 左肺腺癌，pT1aN0M0，Ia phase 2.肺 Cryptococcus ...	1.lung cancer postoperative 2.Pulmonary cryptococcosis3.Chronic viral hepatitis B	Respiratory Internal Medicine Ward(2-14)	2016-05-19	2016-05-25	6	170/83	180					1	1					1			肺腺癌			hepatitis B		1		手术病理提示 Cryptococcus		1		1		1		1						6.1	62.1	30.6
535	27	male	67		1.intracranial infection	1.cryptococcal meningitis2.肺cryptococcosis	Infection ward(6A-10)	2016-05-19	2016-06-15	27	172/52	365		1									1								1		CSF找到 Cryptococcus	1			1		1		1		50	30	1.7	114	11.9	77.9	16.7
536	6	male	41		1.AIDS 2.pulmonary infection PCP Consider first3.口...	1.AIDS2.Pulmonary cryptococcosis3.卡氏肺孢子菌 pneumonia4.巨细胞病...	Infection ward(9-3)	2016-05-20	2016-06-08	19	170/50	20	1	1			1	1					1							1			1		1		1		1		1						4.5	81.6	15.8
537	10	male	58		1.cryptococcal meningitis 2.type 2 diabetes 3.膜性肾病	1.cryptococcal meningitis2.type 2 diabetes3.chronic kidney disease	Infection ward(6A-10)	2016-05-30	2016-06-13	14	160/62	10		1		1					1			1					膜性肾病/带状疱疹		1		CSF找到 Cryptococcus	1		1		1			1		160	180	5.6	120	10.8	75.4	19.6
538	8	male	37		1. AIDS 2.cryptococcal meningitis	1.AIDS2.cryptococcal meningitis3.肺cryptococcosis4.hypokalemia...	Infection ward(9-3)	2016-06-01	2016-06-17	16
539	39	female	62		1.nature of lung lesions to yet to be investigated 两肺多发， Cryptococcus tumor？tuberculosis？2.肾移...	1.Pulmonary cryptococcosis2.renal transplant state3.hypertension 4.基底细胞癌	Respiratory Internal Medicine Ward(2-14)	2016-06-03	2016-06-22	19	158/53	30					1						1			皮肤基底细胞癌		renal transplant	高血压		1		1		1	1		1		1							3.9	59.6	31.5
540	6	female	47		1.intracranial infection Tuberculous meningitis？cryptococcal meningitis？2.hepatitis B表面抗原...	1.cryptococcal meningitis2.hepatitis B表面抗原携带者	Infection ward(6A-8)	2016-06-04	2016-07-05	31	163/50	30	1	1		1					1								hepatitis B		1		CSF找到 Cryptococcus	1			1		1		1		130	350	1.8	115	7.5	68.5	17.3
541	9	male	60		1.右Pulmonary nodule tumor？tuberculosis？ inflammation ？2.肺气肿 3.睡眠障碍 4...	1.肺cryptococcosis2.肺气肿3.睡眠障碍4. chronic 性非萎缩性胃炎5. chronic 性结肠...	Geriatric Department(6B-21)	2016-06-06	2016-06-16	10	173.3/61.4	180										1							高血压		1		肺穿刺病理提示 Cryptococcus		1		1		1		1						3.9	43.7	42.2
542	12	male	26		1.intracranial infection cryptococcal meningitis consider 2.pulmonary infection Pulmonary cryptococcosis首先...	1.cryptococcal meningitis2.pulmonary infection3.EB virus infection 4.Chronic viral hepatitis B6...	Infection ward(9-3)	2016-06-10	2016-07-01	21	170/48	8	1	1			1					1（空洞）							hepatitis B/syphilis/EB virus infection	1			CSF找到 Cryptococcus	1			1		1		1		250	10	1.96	115.1	3.5	75	11.9
543	18	male	46		1.Pulmonary cryptococcosis 2.直肠粘膜脱垂	1.Pulmonary cryptococcosis2.直肠粘膜脱垂	Respiratory Internal Medicine Ward(10-2)	2016-06-13	2016-07-04	21	170/72	23										1									1		肺穿刺病理提示 Cryptococcus		1		1		1		1						7.6	62.5	25
544	35	female	81		1.cryptococcal meningitis 2.hypertension 3.Bilateral thyroid node 4. chronic ...	1.cryptococcal meningitis2.hypertension 3.Bilateral thyroid node 4. chronic 性浅表性胃炎伴糜...	Infection ward(6A-10)	2016-06-14	2016-06-27	13	卧床	30		1		1		1	1		1								高血压		1		CSF找到 Cryptococcus	1			1		1		1		80	10	1.1	114	12.6	89.2	4.4
545	27	female	53		1.Bilateral lung lesions Cryptococcal Consider first2.Chronic viral hepatitis B 3.肝功...	1.两Pulmonary cryptococcosis2.Chronic viral hepatitis B3.肝功能不全	Respiratory Internal Medicine Ward(2-14)	2016-06-15	2016-06-21	6	160/55	10	1					1					1						hepatitis B		1				1		1		1		1						7.3	79.6	14.9
546	20	male	44		1.central nervous system infection viralMeninges encephalitis Consider first	1.cryptococcal meningitis	Infection ward(6A-10)	2016-06-15	2016-07-12	27	175/75	15	1	1		1					1										1		CSF找到 Cryptococcus	1			1		1		1		400	390	1.3	99	8	85.6	8.3
547	61	male	64		1.fever of unknown origin intracranial infection？2.间质性肺病 3.冠状动脉粥样硬化...	1.cryptococcal meningitis2.间质性肺病3.冠状动脉粥样硬化性心脏病4.前列腺...	Infection ward(6A-12)	2016-06-16	2016-07-06	20	173/63	10	1	1								1							间质性 pneumonia/冠心病		1		CSF找到 Cryptococcus	1			1		1		1		120	235	3.2	99	7.4	67.3	26.8
548	37	female	62		1.cryptococcal meningitis 2.hypertension 3. breast cancer postoperative 4. Esophageal cancer ...	1.cryptococcal meningitis2.hypertension 3. breast cancer postoperative 4. Esophageal cancer	Infection ward(6A-11)	2016-06-22	2016-07-20	28	164/47	13	1	1		1	1		1		1					食管癌、乳腺癌					1		CSF找到 Cryptococcus	1			1		1		1		360	220	2.2	103	7.8	88.4	9.6
549	38	female	59		1.Headache to be investigated 2.cryptococcal meningitis Consider first	1.cryptococcal meningitis2.Cryptococcal encephalitis3.hyperglycemia4.pulmonary infection5.Liver function impairment...	Infection ward(6A-9)	2016-06-24	2016-07-20	26	168/80	30		1		1							1								1		CSF找到 Cryptococcus	1			1		1		1		400	1	0.1	101	8	66.8	25.3
550	21	male	36		1.cryptococcosis Lungs	1.cryptococcosis2.hypertension Level 1	Respiratory Internal Medicine Ward(2-16)	2016-06-24	2016-07-05	11	183/92	30										1							高血压		1		肺穿刺病理提示 Cryptococcus		1		1		1		1						6.1	67.9	17.9
551	13	male	59		1.cryptococcal meningitis 2.myasthenia gravis 胸腺 postoperative 3. glaucoma	1.cryptococcal meningitis2.myasthenia gravis3. glaucoma	Infection ward(6A-10)	2016-06-29	2016-07-15	16	188/81	60	1	1							1								重症肌无力		1		CSF找到 Cryptococcus	1		1		1			1		300	200	1.7	98	3.9	75.1	14.1
552	20	male	56		1.Pulmonary cryptococcosis 2.gout 3.fatty liver 4.肝多发囊肿 5.前...	1.Pulmonary cryptococcosis2.gout3.fatty liver4.肝多发囊肿5.Prostatic hyperplasia伴结石	Respiratory Internal Medicine Ward(2-16)	2016-06-30	2016-07-05	5	165/73	30										1							gout		1		肺穿刺病理提示 Cryptococcus		1		1		1		1						7.7	52.2	39.2
553	12	female	65		1.cryptococcal meningitis 2.血小板减少症 3. gastric polyp 4.颅内动...	1.cryptococcal meningitis2.肺cryptococcosis3.血小板减少症4. gastric polyp 5.颅内动...	Infection ward(6A-10)	2016-07-07	2016-07-18	11	155/46	3		1		1						1							血小板减少		1		CSF找到 Cryptococcus	1		1		1			1		390	80	4	100	11.1	91.7	5.2
554	59	female	63		1. pneumonia 左肺，Cryptococcal pneumonia Consider first2.type 2 diabetes	1.Pulmonary cryptococcosis2.type 2 diabetes	Respiratory Internal Medicine Ward(2-16)	2016-07-08	2016-07-21	13	168/62	90					1	1				1		1							1		1		1		1		1		1						4.5	69.8	22.9
555	27	female	64		1.renal transplant state 2.Headache to be investigated cryptococcosis？细菌 infection ？tuberculosis菌感...	1.cryptococcal meningitis2.Chronic viral hepatitis B3.尿路 infection 4.renal transplant postoperative	Infection ward(6A-6)	2016-07-11	2016-08-19	39	152/55	7	1	1								1						renal transplant	hepatitis B		1		CSF找到 Cryptococcus	1		1		1		1			120	30	3.1	128	7.1	83	7
556	5	male	25		1.fever of unknown origin cryptococcal meningitis？	1.AIDS3.cryptococcal meningitis4.pulmonary infection5.巨细胞病毒感...	Infection ward(9-3)	2016-07-12	2016-08-23	42	177/55	7	1	1		1						1（空洞）								1			CSF找到 Cryptococcus	1			1		1		1		90	1	1.8	112	3.8	68.1	16.2
557	10	female	45		1.fever of unknown origin 导管相关 infection Consider first2.纵隔 lymph node肿大 3.肾...	1.cryptococcosis2.Diabetic nephropathy3.renal hypertension4.心功能不全5.type 2 diabetes伴...	renal transplantward(6B-7)	2016-07-14	2016-07-27	13	158/58.7	20	1			1	1						1	1					尿毒症/高血压		1		1		1		1		1		1						25.7	82	7.1
558	35	female	83		1.cryptococcal meningitis 2.胸椎tuberculosis 陈旧性	1.cryptococcal meningitis2.胸椎tuberculosis	Infection ward(6A-9)	2016-07-21	2016-08-16	26	156/45	13		1		1					1										1		CSF找到 Cryptococcus	1			1		1		1		410	100	3.2	114	9.7	82.4	8
559	13	female	46		1.Pulmonary cryptococcosis 2.thyroid node 两侧，多发	1.Pulmonary cryptococcosis2.thyroid node	Respiratory Internal Medicine Ward(2-14)	2016-07-28	2016-08-15	18	160/62	30					1						1								1		肺穿刺病理提示 Cryptococcus		1		1		1		1						8.3	75.2	16
560	20	male	61		1.fever of unknown origin 2.cirrhosis（失代偿） 胆汁淤积性3.消化道出血...	1.cryptococcal meningitis2.cirrhosis（失代偿）3.消化道出血4.胆道 infection 5.脾...	Infection ward(6A-11)	2016-08-01	2016-08-29	28	158/47.2	30	1	1								1							cirrhosis		1		CSF找到 Cryptococcus	1			1		1		1		320	200	2.5	111	4.5	46.2	28.5
561	39	female	62		1.cryptococcal meningitis 2.hypertension 3.Schistosomiasis liver disease	1.cryptococcal meningitis2.hypertension 3.Schistosomiasis liver disease	Infection ward(6A-6)	2016-08-02	2016-09-13	42	158/44.5	20		1								1							高血压		1		CSF找到 Cryptococcus	1			1		1		1		190	50	1.8	105	7.7	81.6	11
562	9	male	37		1.cryptococcal meningitis 2.viral hepatitis B cirrhosis3.diabetes 4...	1.cryptococcal meningitis2.viral hepatitis B3.diabetes4.hypertension 5.肾病综合...	Infection ward(6A-10)	2016-08-09	2016-08-11	2	170/65	30	1	1		1							1	1					高血压/hepatitis B		1		CSF找到 Cryptococcus	1			1		1		1		450	30	6.1	108	8	91.9	2.4
563	53	female	57		1.Headache to be investigated Tuberculous meningitis？2.hypertension 3.免疫性血小板减...	1.cryptococcal meningitis2.hypertension 3. Immune thrombocytopenic purpura 4.After splenectomy...	Infection ward(6A-6)	2016-08-10	2016-08-29	19	卧床	20	1	1		1			1				1						Immune thrombocytopenic purpura		1		CSF找到 Cryptococcus	1		1		1			1		390	330	1.3	113	7.7	72.2	22.1
564	12	female	72		1.cryptococcal meningitis	1.cryptococcal meningitis	Infection ward(6A-10)	2016-08-12	2016-08-26	14	168/55	15	1	1		1		1				1									1		CSF找到 Cryptococcus	1			1		1		1		130	320	2.4	122.2	3.5	53.5	30.2
565	27	female	62		1.cryptococcosis 右肺 infection 2.右Lungs分切除 postoperative 右下肺叶	1.cryptococcosis2.右Lungs分切除 postoperative	Respiratory Internal Medicine Ward(2-16)	2016-08-23	2016-09-02	10	158/51	30					1					1									1		阴性/手术病理提示 Cryptococcus		1		1		1		1						4.6	60.7	27.9
566	9	male	57		1.renal transplant state 2. Transplanted kidney dysfunction 3.diabetes	1.renal transplant state2. Transplanted kidney dysfunction 3.diabetes4.cryptococcosis	renal transplantward(6B-7)	2016-08-26	2016-09-20	25	168/48.1	10								双下肢水肿		1		1				renal transplant	高血压		1		1		1	1		1		1							9.1	73.6	19.3
567	53	male	41		1.cryptococcosis pneumonia	1.cryptococcosis2.viral hepatitis B	Respiratory Internal Medicine Ward(2-16)	2016-08-29	2016-09-08	10	175.5/59	120								胸痛		1							hepatitis B		1		1/穿刺也提示 Cryptococcus		1		1		1		1						5.9	69.2	22.5
568	52	male	58		1.cryptococcal meningitis 2.脑积水 腰大池腹腔分流 postoperative 3.肝炎后...	1.cryptococcal meningitis2.脑积水3.posthepatic cirrhosis4.肝脏 node 5.splenomegaly6.膀...	Infection ward(6A-9)	2016-09-01	2016-09-07	6	164/49.5	365				1				行走不稳	1								hepatitis Bcirrhosis		1		1	1			1		1		1	1		100	2.9	126	5.1	66.4	22.2
569	21	female	79		1.Tuberculous meningitis 2.hypertension3 level 3.胆囊结石 4.干燥综合...	1.cryptococcal meningitis2.垂体瘤3.Hepatic cyst4.肾囊肿5.thyroid node 6.Lungs...	Infection ward(9-4)	2016-09-13	2016-10-10	27	卧床	20	1	1			1			走路不稳			1						高血压		1		CSF找到 Cryptococcus	1			1		1		1		210	27	0.7	108	6.5	85.2	11.7
570	19	male	28		1.AIDS 2.cryptococcal meningitis 3.偏头痛 4...	1.AIDS2.cryptococcal meningitis3.偏头痛4.fatty liver5.巨细...	Infection ward(9-3)	2016-09-17	2016-09-29	12
571	5	female	53		1.fever of unknown origin infection ？tumor？tuberculosis？	1.cryptococcosis2.肺血管炎	Infection ward(6A-8)	2016-09-17	2016-10-14	27	150/41	15	1				1						1						ANCA相关性血管炎		1		未查/病理提示肉芽肿/MDT consider Cryptococcus 合并血管炎		1		1		1		1						10.9	84	7.8
572	9	male	54		1.AIDS 2.肺孢子虫病 3.cryptococcal meningitis...	1.AIDS2.肺孢子虫病3.cryptococcal meningitis4.巨细胞病毒...	Infection ward(9-3)	2016-09-23	2016-10-20	27	174/65	90	1				1			头晕			1							1			CSF找到 Cryptococcus	1			1		1		1		260	100	3.5	120	3	59.2	22.4
573	9	male	49		1.nature of lung lesions to yet to be investigated pulmonary infection？tuberculosis？ fungal infection ？2. chronic 性Hepatitis B...	1.Pulmonary cryptococcosis2.Chronic viral hepatitis B3.fatty liver4.hypokalemia	Respiratory Internal Medicine Ward(2-16)	2016-09-23	2016-10-13	20	170/81	30					1	1					1						hepatitis B		1		1		1		1		1		1						6.2	56.7	29.4
574	38	female	60		1.cryptococcal meningitis 2.nature of lung lesions to yet to be investigated	1.cryptococcal meningitis	Infection ward(6A-6)	2016-09-30	2016-10-10	10	160/53	60		1	1							1									1		1	1			1		1		1		200	120	2.1	121	7.7	63.6	27.2
575	10	female	20		1.cryptococcal meningitis 2.头位顺产 孕2产2孕40周+LOA平...	1.cryptococcal meningitis2.贫血3.头位顺产4.球后视神经炎5.视神经麻痹	Infection ward(6A-10)	2016-10-07	2016-11-10	34	147/48	8	1	1		1					1								产后		1		CSF找到 Cryptococcus	1			1		1		1	1	450	18	2.7	114	12.7	90	6.4
576	7	male	65		1.fever of unknown origin infectious？neoplastic？免疫性?2.Hepatitis B cirrhosis	1.cryptococcal meningitis2.Hepatitis B cirrhosis	Infection ward(6A-8)	2016-10-14	2016-10-25	11	170/55	10	1	1							1（胸腔积液）								hepatitis Bcirrhosis		1		CSF找到 Cryptococcus	1			1		1		1		210	160	1.1	118	2.1	62	23
577	3	female	47		1.cryptococcal meningitis 2.急性cerebral infarction 3.癫痫 4.pulmonary infection ...	1.cryptococcal meningitis2.急性cerebral infarction3.癫痫4.pulmonary tuberculosis，病理（+）5.2 type ...	Infection ward(9-4)	2016-10-18	2016-11-14	27	150/40.5	21		1	1					头晕			1	1	1						1		CSF找到 Cryptococcus	1			1		1		1		205	17	3.7	123	5.5	83	11.9
578	20	male	20		1.AIDS 2.Cryptococcal encephalitis 3.cryptococcosis 隐...	1.AIDS3.cryptococcosis5.giant cell virus infection 6.EB virus infection ...	Infection ward(9-3)	2016-10-26	2016-11-14	19	171/55	30	1	1								1								1			血培养/CSF培养提示 Cryptococcus	1			1		1		1		280	25	2.6	128	2.8	36.6	30.6
579	19	male	38		1.AIDS 2.卡氏肺孢子菌 pneumonia 3.EB病毒...	1.AIDS2.cryptococcal meningitis3.卡氏肺孢子菌 pneumonia4.EB...	Infection ward(9-3)	2016-10-28	2016-11-18	21	168/50	7	1	1		1							1						hepatitis B	1			脑脊液找到 Cryptococcus	1			1		1		1		310	80	3	103	6.7	83.3	7.5
580	1	female	50		1.肺cryptococcosis	1.肺cryptococcosis	Infection ward(6A-8)	2016-11-09	2016-11-11	2	156/50	90					1					1							Rheumatoid Arthritis		1		手术病理提示 Cryptococcus		1	1		1			1						6.3	69.7	21.6
581	5	female	57		2.Pulmonary nodule inflammation Consider first3.室性早搏 4.银屑病	1.Pulmonary cryptococcosis2.室性早搏3.银屑病4.thyroid node	Respiratory Internal Medicine Ward(2-14)	2016-11-16	2016-11-24	8	160/60	8										1									1		1		1		1		1		1						5.8	60.6	31.6
582	20	male	78		1.meningitis tuberculosis ？ cryptococcal ？2.cirrhosisDecompensation 3.Pulmonary nodule...	1.cryptococcal meningitis2.cirrhosisDecompensation3.Pulmonary nodule4.After splenectomy5.hypertension...	Infection ward(9-4)	2016-11-16	2016-12-01	15	162/卧床	20	1	1		1			1	走路不稳		1							高血压		1			1			1		1		1		75	587	0.53	117	6.5	53.9	32.6
583	5	female	50		1.Cryptococcal encephalitis 3.全身性硬皮病 4. rheumatoid arthritis 5....	1.Cryptococcal encephalitis2.全身性硬皮病3. rheumatoid arthritis 4.肺纤维化5.腔隙...	Infection ward(6A-12)	2016-11-18	2016-11-19	1
584	13	female	50		1.systemic lupus erythematosus 2. Lupus nephritisIV type -S(A) 3.狼疮...	1.systemic lupus erythematosus2. Lupus nephritisIV type -S(A)3. Lupus nephritisV type 4....	Kidney Disease WardSecond Ward(6B-9)	2016-11-18	2016-12-16	28	158/64	30	1				1						1	1					SLE		1		1		1	1		1			1						4.8	75.4	15.5
585	-8	male	69		1.nature of lung lesions to yet to be investigated cryptococcosis Consider first2.hypertension 3.前...	1.Pulmonary cryptococcosis2.hypertension 3.Prostatic hyperplasia4.肝血管瘤5.胆囊切除 postoperative 6...	Respiratory Internal Medicine Ward(2-14)	2016-11-18	2016-11-23	5	173/83	15										1							高血压		1		1		1		1		1		1						6.4	67.4	26.2
586	37	male	41		1.Central infection 隐脑？Tuberculous meningitis？	1.cryptococcal meningitis	Infection ward(6A-6)	2016-11-23	2017-01-03	41	168/75	10	1	1							1										1		1	1			1		1		1		240	100	2.7	111.5	11	70.3	21.2
587	16	male	31		1.Central infection 2.AIDS 3.syphilis	1.AIDS3.cryptococcosis4.pulmonary infection5.肠道 infection 6.肝功能...	Infection ward(9-3)	2016-12-09	2017-01-13	35	168/卧床	11	1	1		1					1								syphilis	1			CSF找到 Cryptococcus	1			1		1		1	1	400	2	2.5	120	3.3	72.2	21.7
588	12	male	47		1.Pulmonary cryptococcosis 2.Chronic viral hepatitis B 3.肝癌 postoperative 4.脾...	1.Pulmonary cryptococcosis2.Hepatitis B cirrhosis3.肝癌 postoperative 4.After splenectomy5.腹腔积液	Infection ward(6A-9)	2016-12-13	2016-12-23	10	165/59	120					1					1				肝癌			hepatitis B		1		手术病理提示 Cryptococcus		1		1		1		1						4	30.6	59.5
589	53	female	72		1.meningitis Cryptococcus 阳性2.hypertension 长 phase 服用降压药	1.cryptococcal meningitis2.hypertension	Infection ward(6A-12)	2016-12-14	2016-12-19	5	卧床	60	1	1					1		1								高血压		1			1			1		1		1		50	18	0.55	107	5.6	88.5	8
590	17	female	53		1.intracranial infection	1.cryptococcal meningitis	Infection ward(6A-11)	2016-12-16	2017-01-23	38		30	1	1					1	双视	1										1		脑脊液培养阳性	1			1		1		1			150	1.5	113	5.9	77.4	11.4
591	20	male	67		1.intracranial infection Tuberculous meningitis？cryptococcal meningitis？viralmeningitis？2...	1.cryptococcal meningitis2. rheumatoid arthritis 3.hypertension 4.腰椎间盘突出5.E...	Infection ward(6A-12)	2016-12-22	2016-12-30	8	160/43	7	1	1					1	视物模糊	1				1				rheumatoid arthritis /高血压		1		1	1		1		1			1		400	120	1.2	110	11.2	93.4	4.1
592	8	male	42		1.cryptococcal meningitis 2.Cryptococcal encephalitis 3. disturbance of consciousness 4.gout...	1.cryptococcal meningitis3.gout4.pulmonary infection5.肺大泡6.肋骨骨折7.支气管...	Infection ward(6A-12)	2016-12-23	2016-12-30	7	174/卧床	4	1	1					1			1									1		1	1			1		1		1		450	（+）	3.17	123.3	28.1	92	3.1
593	3	female	73		1.fever of unknown origin pulmonary infection？泌尿系 infection ？tumor？2.免疫性血小板减...	1.Cryptococcal encephalitis2.脑缺血性改变4.海绵状血管瘤6.pulmonary infection7.骨质疏...	干部病房Second Ward(6B-23)	2016-12-26	2017-01-22	27	165/50.5	7	1	1								1		1					Immune thrombocytopenic purpura		1			1		1		1			1		225	50	3.7	125	7.8	82.3	12.4
594	22	male	33		1.cryptococcal meningitis 2.Chronic viral hepatitis B 3.infectious心内膜...	1.cryptococcal meningitis2.Chronic viral hepatitis B3.急性肾功能损害	Infection ward(6A-10)	2017-01-01	2017-01-19	18	156/60	1 year		1								1									1				1		1		1		1	0	125	1	4.1	127	5	55.6	35.2
595	26	male	57		1.cryptococcosis	1.cryptococcosis2.肺恶性tumor3.lung cancer postoperative	Infection ward(6A-6)	2017-01-05	2017-01-06	1	160/74.5	2 year								1			1						肾脏切除 postoperative ，吸毒史		1				1		1		1		1	0	180	0	4.3	131	6.5	87.4	8.6
596	52	male	44		1.Bilateral lung lesions infection Consider first，tumor Wait to confirm2.肾脏切除 postoperative 右肾3...	1.Pulmonary cryptococcosis2.输尿管结石3.diabetes4.肾脏切除 postoperative 5. chronic 性化脓性中...	Respiratory Internal Medicine Ward(2-16)	2017-01-10	2017-01-20	10	178/73	15 days								1		1				1					1				1		1		1		1	0	140	1	4.3	128	6.4	69.8	19.7
597	23	male	44		1.cryptococcosis 2.tumor 左肺低分化神经内分泌癌，局限 phase	1.Pulmonary cryptococcosis2.lung cancer	Infection ward(6A-12)	2017-01-11	2017-01-16	5	158/52	1 weeks	1	1									1						血管炎肾损伤、CKD4期		1			1		1		1			1	0	＞400	23	2.6	121	6.2	82.4	10.8
598	51	female	68		1.cryptococcal meningitis 2.cryptococcosis pneumonia？3.血管炎性肾小球肾...	1.cryptococcal meningitis2.pulmonary infection3.血管炎性肾小球肾炎4.肾性贫血5.肾...	Infection ward(6A-6)	2017-01-21	2017-02-14	24	153/61	1months					1	1					1								1		1		1		1		1		1	0		0	3.2	116	8.4	78.3	17.3
599	31	female	39		1. community acquired pneumonia， Non critical	1.cryptococcosis	Respiratory Internal Medicine Ward(2-14)	2017-01-24	2017-02-09	16	160/56	20+ days		1		1					1									1				1			1		1		1	1	＞400	180	1.8	112	3.7	82.1	9.8
600	13	female	33		1.cryptococcal meningitis 2.胆囊结石伴急性胆囊炎	1.AIDS2.cryptococcal meningitis3.胆囊结石伴急性胆囊炎4....	Infection ward(9-3)	2017-01-25	2017-02-23	29	158/49	half months	1	1							1								nephrotic syndrome		1		0	1		1		1			1	0	60	1000	1.6	111	3.7	62.3	23.2
601	26	male	68		1.meningitis meningitis？Tuberculous meningitis？隐脑？2.nephrotic syndrome	1.cryptococcal meningitis2.nephrotic syndrome	Infection ward(6A-10)	2017-02-03	2017-02-14	11	170/61.5	10 days		1		1					1									1				1			1		1		1	1	320	7	3.09	388	7.8	94.6	3.3
602	17	male	36		1.AIDS HIV初筛阳性2.cryptococcal meningitis ...	1.AIDS2.cryptococcal meningitis3.电解质代谢紊乱	Infection ward(9-3)	2017-02-05	2017-03-07	30	165/59	1 weeks	1	1					1												1			1			1		1		1	0	130	400	4.9	124	22	97.1	2.5
603	15	male	42		1.Cryptococcal encephalitis 2.renal hypertension 3.pulmonary infection 4.纵隔气肿...	1.Cryptococcal encephalitis2.IgA肾病3.renal hypertension4.pulmonary infection5.纵隔气肿6...	Infection ward(6A-12)	2017-02-06	2017-02-17	11	160/54	3months								1		1									1		1		1		1		1		1						6.5	63.8	25.8
604	1	female	50		1.Pulmonary cryptococcosis	1.Pulmonary cryptococcosis2.D-二聚体升高	Respiratory Internal Medicine Ward(2-14)	2017-02-16	2017-02-27	11	155/49	40+ days					1						1	1							1				1		1		1		1	0	150	8	3.9	120	4.7	89.5	6.1
605	22	female	58		1.lymphoma Wait to confirm2.cryptococcosis 3.type 2 diabetes 4.hypertension ...	1.cryptococcosis2.马尔尼菲青霉菌 infection 3.诺卡菌病4.组织胞浆菌病5.2 type ...	Infection ward(6A-9)	2017-02-17	2017-03-08	19	170/59	2months	1										1							1				1			1		1		1	0	240	0	2.6	122	3.9	61.8	15.5
606	15	male	26		1.AIDS 2.fever of unknown origin 肝脓肿 consider 3.Sepsis...	1.AIDS2.cryptococcosis3.肝多发低密度 node	Infection ward(9-3)	2017-02-20	2017-03-11	19	105/13.5	20+ days		1		1							1							1				1			1		1		1	0		2	3.3	126	3.8	60.3	30.6
607	53	male	32		1.cryptococcal meningitis	1.cryptococcal meningitis	Infection ward(6A-6)	2017-02-23	2017-03-03	8
608	1	female	6		1.AIDS 待确诊2.cryptococcal meningitis 3.口腔...	1.AIDS4.cryptococcosis5.口腔念珠菌 infection 6.肺cryptococcosis...	Infection ward(9-3)	2017-02-25	2017-03-28	31	160/56	1months+							1		1										1		0	1			1		1		1	1	120	7	6.7	129	9.6	47.3	36.5
609	11	female	65		1.cryptococcal meningitis 2.hypertension	1.cryptococcal meningitis2.hypertension 3.胆囊炎4.胆囊结石	Infection ward(6A-10)	2017-02-27	2017-03-24	25	170/83	half months+	1	1								1		1							1			1			1		1		1	0	245	200	1.5	113	13.7	80.9	11.9
610	9	male	70		1.meningitis viral Consider first2.hypertension 3.type 2 diabetes 4....	1.cryptococcal meningitis2.hypertension 3.type 2 diabetes4.cerebral infarction5.fatty liver6.右...	Infection ward(6A-10)	2017-03-06	2017-03-23	17	150/45	1months+		1					1				1	1							1			1			1		1		1	0	220	350	3.7	105	10.3	81.3	11.9
611	50	female	77		1.cryptococcal meningitis 2.type 2 diabetes 3.hypertension 4.髋关节...	1.cryptococcal meningitis2.type 2 diabetes3.hypertension 4.髋关节置换 postoperative	Infection ward(6A-6)	2017-03-09	2017-03-18	9	157/61.5	1months+	1	1							1										1		1	1			1		1		1	0	230	2	3.5	128	10.7	56.7	32.7
612	13	female	49		1.cryptococcal meningitis	1.cryptococcal meningitis2. Liver function damage	Infection ward(6A-10)	2017-03-09	2017-04-10	32	174/80	1months+					1						1								1		0		1		1		1		1	0	110	0	3.6	127	6.6	73.8	18.2
613	-6	male	41		1.右肺病灶 cryptococcosis Consider first	1.Pulmonary cryptococcosis	Respiratory Internal Medicine Ward(10-2)	2017-03-10	2017-03-28	18	160/95	half months					1	1					1								1		1		1		1		1		1	0	120	1	5.8	120	7.1	83.2	9.7
614	21	male	40		1.AIDS 2.cryptococcal meningitis V-P分流 postoperative ...	1.AIDS2.cryptococcal meningitis3.type 2 diabetes	Infection ward(9-3)	2017-03-15	2017-03-17	2
615	7	female	47		1.nature of lung lesions to yet to be investigated inflammation ？ fungus ？tuberculosis？2.肾结石 双肾3....	2.间质性肺病3.Pulmonary cryptococcosis4.肾结石5.fatty liver	Respiratory Internal Medicine Ward(2-16)	2017-03-15	2017-03-30	15	170/71	9 days	1										1								1		1		1		1		1		1		110	1	3.8	123	8.6	79.5	11.9
616	7	male	35		1.AIDS 2.cryptococcal meningitis	1.AIDS2.cryptococcal meningitis3.脑水肿4.癫痫5.Lungs感...	Infection ward(9-3)	2017-03-16	2017-03-29	13
617	16	male	51		1.Lungs阴影 inflammation ？tumor？tuberculosis？	1.Pulmonary cryptococcosis	Respiratory Internal Medicine Ward(2-16)	2017-03-22	2017-04-05	14	165/56	2months	1	1					1												1		1	1			1		1		1	1	210	150	3.1	107	7	78	13.8
618	36	male	68		1.intracranial infection Tuberculous meningitis？病脑？meningitis？	1.cryptococcal meningitis	Infection ward(6A-10)	2017-03-24	2017-04-05	12	168/82	2months					1					1									1		1		1		1		1		1						11.7	85.2	7.1
619	37	male	53			1.cryptococcosis2.二尖瓣和主动脉瓣的疾患	Respiratory Internal Medicine Ward(2-14)	2017-03-29	2017-04-19	21	175/79	10 days		1		1							1							1			1	1			1		1		1	1		8	2.6	120	2.2	56.9	29.6
620	16	male	47	complete	1.AIDS HIV初筛阳性2.cryptococcal meningitis	1.AIDS2.cryptococcal meningitis4.卡氏肺孢子菌 pneumonia	Infection ward(9-3)	2017-03-31	2017-05-02	32	164/63	4months								1			1	1							1		1		1		1		1		1	0		1	6.9	127	7.7	67	23.8
621	20	female	23		1.systemic lupus erythematosus 2.狼疮性心肌病 3. Lupus nephritis 4.骨...	1.systemic lupus erythematosus2.狼疮性心肌病3. Lupus nephritis4.骨质疏松5.股骨头...	Rheumatic Immune Ward(2-19)	2017-04-01	2017-04-07	6
622	30	male	54		1.Bilateral lung lesions inflammation ？ fungus ？tumor？2.type 2 diabetes	1.Pulmonary cryptococcosis2.type 2 diabetes	Respiratory Internal Medicine Ward(2-16)	2017-04-10	2017-04-20	10	165/81	1months	1				1					1									1		1		1		1		1		1	0	150	0	4.1	118	11.3	71.8	19.4
623	17	female	29		1.Pulmonary cryptococcosis	1.Pulmonary cryptococcosis	Respiratory Internal Medicine Ward(2-14)	2017-04-13	2017-04-25	12	178/78	1months	1									1									1		1		1		1		1		1	0		0	3.2	124	6.7	66.8	25
624	-5	male	57		1. pneumonia	1.Pulmonary cryptococcosis	Respiratory Internal Medicine Ward(2-16)	2017-04-14	2017-05-04	20	158/47.5	20 days	1	1		1							1	1					SLE，自免肝		1			1		1		1			1	0		150	2.4	118	6.3	80.1	12.3
625	6	female	74		1.Cryptococcal encephalitis 2.脑缺血性改变 两侧侧脑室旁、半卵圆中心...	1.Cryptococcal encephalitis2.脑缺血性改变3.海绵状血管瘤4.pulmonary infection5.骨质疏...	Geriatric Department(6B-21)	2017-04-17	2017-04-26	9
626	53	female	54		1.Meninges encephalitis new type Cryptococcus 2.type 2 diabetes 3.Autoimmune Liver Disease ...	2.cryptococcal meningitis3.Autoimmune Liver Disease4.systemic lupus erythematosus5.thyroid切除术...	Infection ward(6A-6)	2017-04-17	2017-05-03	16	155/60	1months		1		1	1					1							剖宫产 postoperative 3天		1		1	1			1		1		1		215	260	1.4	121	5.4	92.2	6.1
627	-2	male	64		1.Pulmonary cryptococcosis	1.Pulmonary cryptococcosis2.前列腺结石	Respiratory Internal Medicine Ward(2-16)	2017-04-19	2017-04-29	10
628	10	female	32		1.cryptococcal meningitis 2.颅内静脉窦血栓形成	1.cryptococcal meningitis2.癫痫	Infection ward(6A-10)	2017-04-24	2017-05-15	21	170/63	5 days	1	1		1							1						nephrotic syndrome		1			1		1		1		1		1	220	15	3.4	128	11.1	78.2	15.7
629	16	male	31		1.cryptococcal meningitis 2.nephrotic syndrome，膜性肾病 3.pulmonary infection	1.cryptococcosis2.nephrotic syndrome，膜性肾病3.pulmonary infection	Infection ward(6A-10)	2017-04-28	2017-06-05	38	170/54	2months		1								1								1				1			1		1		1	1	330	80	0.6	110	8.2	75.2	15.1
630	-3	male	67		1. pneumonia fungal infection Consider first	1.肺cryptococcosis	Respiratory Internal Medicine Ward(2-16)	2017-05-02	2017-05-16	14
631	18	male	50		1.AIDS 初筛阳性2.cryptococcal meningitis	1.AIDS2.cryptococcal meningitis3.左 pneumonia	Infection ward(9-3)	2017-05-03	2017-06-13	41	176/73	2months					1					1									1		1		1		1		1		1	0	100	0	3.8	125	5.7	53.9	32.6
632	52	male	45		1.Lungs阴影 Lungs Cryptococcus pneumonia？tumor？	2.Pulmonary cryptococcosis	Respiratory Internal Medicine Ward(2-16)	2017-05-18	2017-06-06	19	170/72	8 days								1		1									1		1		1		1		1		1	0		0	3.9	118	6.6	62.3	23.7
633	39	male	52		1.行走不稳 yet to be investigated Wernicke脑病 Consider first2. cryptococcal 脑...	1.cryptococcal meningitis2.肝移植状态3.肝多发囊肿4.脑缺血性改变	Infection ward(6A-6)	2017-05-27	2017-06-09	13
634	38	male	49		1.cryptococcosis 右肺	1.cryptococcosis	Respiratory Internal Medicine Ward(2-14)	2017-06-01	2017-06-08	7	150/45	11 days	1	1								1									1		1	1			1		1		1	0	300	190	5.7	119	15.1	89.1	6.6
635	12	female	56		1.cryptococcal meningitis 2.hypertension	1.cryptococcosis2.hypertension	Infection ward(6A-10)	2017-06-01	2017-07-01	30	168/61	6months								1		1									1		1		1		1		1		1						5.5	53.3	36.9
636	29	male	24		1.Lungs阴影 Cryptococcal pneumonia？ pulmonary tuberculosis？ inflammation ？2. chronic 性鼻炎	1.Pulmonary cryptococcosis2. chronic 性鼻炎3.fatty liver	Respiratory Internal Medicine Ward(2-16)	2017-06-07	2017-06-12	5	160/62.5	half months		1		1					1								前列腺癌 postoperative		1		1	1			1		1		1	0	450	10	3.8	114	10.2	77.8	13
637	23	male	72		1.cryptococcal meningitis 2. abnormal liver function 3.hypertension 4.前列腺...	1.cryptococcal meningitis2. abnormal liver function 3.hypertension 4.不完全性右束支传导阻滞...	Infection ward(6A-12)	2017-06-13	2017-07-05	22	167/43	2months+		1									1						breast cancer postoperative ，放化疗 postoperative		1		1	1			1		1		1	1	250	18	2.7	108	5	74.2	16
638	5	female	52		1.intracranial infection cryptococcal meningitis consider 2. breast cancer postoperative 放化疗 postoperative 、...	1.cryptococcal meningitis2.pulmonary infection3. breast cancer postoperative 4.胸腔积液	Infection ward(6A-10)	2017-06-14	2017-07-03	19	170/45	3months	1	1		1			1											1			1	1			1		1		1	1			1.7	115	5	88.4	5.8
639	2	male	31		1.AIDS 2.cryptococcal meningitis	1.AIDS2.消化道穿孔3.cryptococcal meningitis4.腹腔积液5...	negative pressure ward(9-5)	2017-06-14	2017-06-20	6	155/34.5	1 weeks	1	1									1					1			1		1	1		1		1		1		0	170	90	5	122	4.8	74.4	16.3
640	10	female	20		3.Cryptococcal encephalitis 4.renal transplant state 急性T -细胞介导的排斥反...	1.cryptococcosis2.cirrhosis3.renal transplant state4.肾性贫血6.腹水7.肾功能衰竭	Infection ward(6A-8)	2017-06-19	2017-07-07	18	160/51	12 days		1									1								1		0	1			1		1		1	0	90	200	2.7	124	6.5	68.5	22.6
641	36	female	33		1.central nervous system infection viral consider	1.cryptococcal meningitis2.pulmonary infection	Infection ward(6A-9)	2017-06-20	2017-07-06	16	171/73	40 days	1				1					1									1		1		1		1		1		1						7.6	55.3	25.2
642	11	male	30		1.Pulmonary cryptococcosis	1.Pulmonary cryptococcosis2.thyroid node	Respiratory Internal Medicine Ward(2-16)	2017-06-20	2017-07-10	20	172/71	2months		1		1							1	1							1		1	1			1		1		1	0	320	0	1.9	115	7.6	68.6	18.7
643	17	male	60		1.intracranial infection 隐脑 Consider first2.hypertension 3.type 2 diabetes 4....	1.cryptococcal meningitis2.hypertension 3.type 2 diabetes4.腔隙性cerebral infarction5.肾切除...	Infection ward(6A-10)	2017-06-22	2017-07-10	18	190/93	2 weeks		1									1							1				1			1		1		1	1	400	3	4.1	118	6.6	73.7	21.6
644	5	male	63		1.AIDS 2.intracranial infection	1.AIDS2.cryptococcal meningitis3.电解质代谢紊乱	Infection ward(9-3)	2017-07-04	2017-08-09	36	170/64	2months		1		1						1							颅内静脉窦狭窄		1		1	1			1		1		1	0	＞450mmH2O	30	0.6	120	5.7	88.6	4.1
645	25	female	45		1.Headache to be investigated intracranial infection？偏头痛？2.hemolytic anemia 3.胆囊切除...	1.cryptococcal meningitis2.hypokalemia3.hemolytic anemia4.胆囊切除 postoperative 5.颅内静...	Infection ward(6A-12)	2017-07-10	2017-07-28	18	175/84	2months	1	1							1								酒精性cirrhosis（Decompensation）		1		1	1			1		1		1	1	175	30	3.7	101	5.7	73.3	12.4
646	53	male	72		1.cryptococcal meningitis 2.酒精性cirrhosis Decompensation3.Prostatic hyperplasia...	1.cryptococcal meningitis2.酒精性cirrhosis3.食管胃底静脉曲张4.splenomegaly5.肝占...	Infection ward(6A-6)	2017-07-12	2017-08-07	26	178/75	10 days			1	1						1								1				1			1		1		1	1	350	3	0.7	125	7.9	83.8	0.94
647	17	male	30		1.AIDS 2.intracranial infection cryptococcal meningitis？tuberculosis...	1.AIDS2.cryptococcal meningitis3.pulmonary infection4.心律失常5....	Infection ward(9-3)	2017-07-14	2017-09-11	59	180/69	half months	1	1									1							1			1	1			1		1		1	0	385	20	3.5	120	5.1	86.4	8.9
648	27	male	59		1.肾结石 右侧2.cryptococcosis Lungs3.hypertension	1.肾结石2.cryptococcosis3.hypertension	Urology Ward(5-2)	2017-07-20	2017-07-24	4
649	2	male	48		1.AIDS yet to be investigated2.cryptococcal meningitis	1.AIDS2.cryptococcal meningitis3.电解质代谢紊乱4.低钾血...	Infection ward(9-3)	2017-07-25	2017-08-23	29	168/69	1months+	1	1									1								1		1	1			1		1		1	1	253	1	3.3	127	6.6	64.9	24.9
650	20	male	46		1.cryptococcal meningitis 2.pulmonary infection Cryptococcal pneumonia consider	1.cryptococcosis2.cryptococcal meningitis4.pulmonary infection5.Prostatic hyperplasia	Infection ward(6A-11)	2017-07-26	2017-08-14	19	160/50	3 weeks	1	1		1							1						Cryptococcemia，消化道出血		1		1	1			1		1		1	1	200	2	2.8	96	14.4	92.6	3.4
651	58	female	71		1.cryptococcal meningitis 2. diarrhea yet to be investigated bacterial？viral？功能性？3...	1.cryptococcal meningitis4.cryptococcosis5. diarrhea 6.Sepsis7.pulmonary infection8.消化道...	Infection ward(6A-6)	2017-08-02	2017-09-08	37	156/40	40 days		1		1							1						Rheumatoid Arthritis		1		1	1		1		1			1	0	210	25	0.4	111	11.9	89.2	2.5
652	2	female	69		1.cryptococcal meningitis 2. rheumatoid arthritis 3.pulmonary infection 4.低...	1.cryptococcal meningitis2. rheumatoid arthritis 3.pulmonary infection4.低蛋白血症	Infection ward(6A-10)	2017-08-07	2017-08-16	9	165/49	5months								1		1								1					1		1		1		1	1	100	0	3.9	127	6.5	54	19.2
653	8	male	42		1.AIDS ?2.cryptococcosis Sepsis？3.肺空洞...	1.AIDS2.cryptococcosis3.电解质代谢紊乱	Infection ward(9-3)	2017-08-09	2017-08-30	21	153/56	1months				1					1								Rheumatoid Arthritis，大动脉炎		1			1			1		1		1	0	370	100	1.6	107	6.9	80.4	11.5
654	50	female	37		1.cryptococcal meningitis 2. rheumatoid arthritis 3.hypertension 4.大...	1.cryptococcal meningitis2. rheumatoid arthritis 3.hypertension 4.大动脉炎5.Pulmonary nodule	Infection ward(6A-6)	2017-08-17	2017-09-06	20	150/50	2months		1							1										1			1			1		1		1	0	195	30	0.2	112	7.4	87.7	6
655	3	female	74		1.cryptococcal meningitis 2.Pulmonary nodule 3.肾囊肿 4.Hepatic cyst	1.cryptococcal meningitis2.Pulmonary nodule3.肾囊肿4.Hepatic cyst	Infection ward(6A-8)	2017-08-17	2017-09-08	22	168/62.5	half months	1	1		1						1		1							1			1			1		1		1	0	400	8	1.1	106	8.7	79.6	5.2
656	1	male	69		1.cryptococcal meningitis 2.心律失常 3.房颤 阵发性4.hypertension...	1.cryptococcal meningitis2.阵发性心房纤颤3.hypertension 4.diabetes5.thyroid切...	Infection ward(6A-10)	2017-08-18	2017-09-01	14	165/63	11 days	1	1					1		1									1				1			1		1		1	0	190	28	1.3	115	5.8	81.7	10.5
657	56	female	38		1.cryptococcal meningitis	1.cryptococcal meningitis2.AIDS3.肝内钙化点4.脑缺血灶	Infection ward(6A-12)	2017-08-28	2017-09-01	4	165/60	1months		1									1								1			1			1		1		1	0	450	70	0.3	112	21.4	40	36
658	-9	male	43		1.Pulmonary cryptococcosis	1.Pulmonary cryptococcosis	Respiratory Internal Medicine Ward(2-14)	2017-08-29	2017-09-05	7
659	21	female	48		1.central nervous system infection cryptococcal meningitis	1.cryptococcal meningitis	Infection ward(6A-9)	2017-09-05	2017-10-12	37	165/45	8 days	1		1								1							1			1		1		1		1		1	0	70	17	3.3	123	6.5	48.5	34.3
660	36	female	37		1.Pulmonary cryptococcosis 右下肺叶切除 postoperative 2.液气胸 右侧3.胆囊息肉...	1.Pulmonary cryptococcosis2.液气胸3.胆囊息肉	Respiratory Internal Medicine Ward(2-14)	2017-09-11	2017-09-18	7
661	17	male	52		1.AIDS 2.cryptococcosis 4.hypertension	1.AIDS2.cryptococcosis3.pulmonary infection4.intracranial infection5.肝功能...	Infection ward(9-3)	2017-09-11	2017-09-15	4		2months	1	1									1								1		1	1			1		1		1	0	150	60	2.1	111	6.1	75	14.2
662	12	male	70		1.intracranial infection tuberculosis consider 2.viral hepatitisHepatitis B 3.肾结石 left	1.cryptococcosis2.pulmonary infection3.hypokalemia4.Chronic viral hepatitis B5.肾结石	Infection ward(9-4)	2017-09-13	2017-10-11	28	158/47.5	1months	1									1		1					nephrotic syndrome		1		1	1		1		1			1	0	170	400	4.6	106	8.8	94.3	4.6
663	28	female	70		1.fever of unknown origin infection Consider first2.nephrotic syndrome，系膜增殖性肾小球肾...	1.cryptococcal meningitis2.nephrotic syndrome，膜性增生性肾小球肾炎3.hypertension 3 level ...	Infection ward(6A-9)	2017-09-22	2017-10-19	27	158/51	1months	1	1							1								血吸虫cirrhosisAfter splenectomy（脾肾分流）		1			1			1		1		1	0	80	130	1.9	108	2.4	44.7	35.7
664	33	female	65		1.fever of unknown origin 2.血吸虫病性cirrhosis 脾切除、脾肾分流、套扎术...	1.cryptococcal meningitis2.血吸虫病性cirrhosis4.After splenectomy5.重度贫血6.深...	Infection ward(6A-11)	2017-09-23	2017-10-18	25	172/62.5	half months	1	1		1						1									1			1			1		1		1	0	98	220	0.8	99	3.8	67	16.4
665	30	male	63		1.intracranial infection Tuberculous meningitis Consider first	1.central nervous system infection2.cryptococcal meningitis3.脑缺血性改变4.两下肺病变5...	Infection ward(6A-12)	2017-09-27	2017-10-17	20	163/54	2months	1	1		1	1						1						nephrotic syndrome		1		1	1		1		1			1	0	310	80	2.9	120	8.1	87.7	7.8
666	2	male	59		1.cryptococcal meningitis 2.hypertension3 level 3.nephrotic syndrome 4.脑梗...	1.cryptococcal meningitis2.hypertension3 level 3.nephrotic syndrome4. cerebral infarction 5.支气管哮喘...	Infection ward(6A-12)	2017-09-28	2017-10-27	29	171/93	half months								1		1									1		1		1		1		1		1						5.3	54.8	35.3
667	52	male	37		1.左肺病灶 Pulmonary cryptococcosis Consider first2.fatty liver 3.Prostatic hyperplasia	1.Pulmonary cryptococcosis2.fatty liver3.Prostatic hyperplasia	Respiratory Internal Medicine Ward(2-14)	2017-09-29	2017-10-10	11	163/68	8months								1			1						韦格肉芽肿		1		1		1	1		1		1							9	64.6	26.9
668	31	male	56		1.Pulmonary cryptococcosis 2.支气管扩张 3.系统性血管炎 ANCA相...	1.Pulmonary cryptococcosis2.系统性血管炎3. herpes zoster后遗症4.Chronic viral hepatitis B	Respiratory Internal Medicine Ward(2-16)	2017-10-02	2017-10-24	22
669	39	male	36		1.肺多发 node tuberculosis？ fungus ？tumor？2.fatty liver 3.胆囊息肉 ...	1.Pulmonary cryptococcosis2.fatty liver3.胆囊息肉4.鼻息肉5.前列腺钙化灶	Respiratory Internal Medicine Ward(2-16)	2017-10-09	2017-10-18	9	158/45	half months								胸痛		1									1		1		1		1		1		1	0	70	0	3.7	126	9.1	74.6	20.1
670	53	female	39		1.Pulmonary cryptococcosis	1.Pulmonary cryptococcosis2.thyroid node	Respiratory Internal Medicine Ward(2-16)	2017-10-11	2017-10-23	12	卧床	5months		1					1			1							左肾缺如		1		1	1			1		1		1						6	88.4	6
671	21	male	66		1.cryptococcal meningitis 2.直肠腺瘤 postoperative 3.hypertension2 level 很高危...	1.cryptococcal meningitis2.直肠腺瘤 postoperative 3.hypertension2 level 4. chronic 性萎缩性胃炎5....	Infection ward(6A-12)	2017-10-12	2017-10-27	15
672	13	female	81		1.cryptococcal meningitis 2.肾缺如 left	1.cryptococcal meningitis2.肾缺如	Infection ward(6A-9)	2017-10-26	2017-11-20	25	165/61.5	2months		1						行走不稳		1							矽肺(硅肺)肾上腺皮质功能减退		1		1	1		1		1			1	0	85	65	2.5	121	4.2	60.8	28.8
673	35	male	69		1.cryptococcal meningitis 2.cerebral infarction 3.肾上腺皮质功能减退 4....	1.cryptococcal meningitis2.cerebral infarction3.肾上腺皮质功能减退4.动脉粥样硬化5....	Infection ward(6A-9)	2017-10-27	2017-11-14	18	172/75	1months+		1			1		1			1									1			1			1		1		1	0	360	100	0.5	109	10	65.4	25.2
674	13	male	51		1.cryptococcal meningitis 2.fatty liver 3.Prostatic hyperplasia	1.cryptococcal meningitis2. Liver function damage 3.fatty liver4.Prostatic hyperplasia	Infection ward(6A-10)	2017-10-28	2017-11-21	24	168/70	10+ days	1	1		1							1						酒精性cirrhosis（Decompensation）		1		1	1			1		1		1	0	155	500	2.6	113	4.4	62.7	23.3
675	22	male	63		1.central nervous system infection 2.酒精性cirrhosis Decompensation3.splenomegaly	1.cryptococcal meningitis2.cirrhosis3.splenomegaly	Infection ward(6A-6)	2017-10-30	2017-11-09	10	168/80	10+ days	1	1							1								cirrhosis（失代偿）		1		1	1			1		1		1	失败					2.5	81.1	10.1
676	31	male	70		1.fever of unknown origin infectious？neoplastic？免疫性？2.cirrhosis（失代偿） ...	1.cryptococcal meningitis2.cirrhosis（失代偿）3. renal insufficiency 4.Prostatic hyperplasia5....	Infection ward(6A-6)	2017-11-03	2017-11-09	6	150/44	3 weeks	1				1					1		1					rheumatoid arthritis		1		1		1	1		1		1							8.2	87.5	8.6
677	30	female	59		1.pulmonary infection 2.rheumatoid arthritis 3.diabetes 4.hypertension 5...	1.肺cryptococcosis2. rheumatoid arthritis 3.diabetes4.hypertension 5.胆囊结石6...	Respiratory Internal Medicine Ward(2-14)	2017-11-06	2017-11-21	15	155/41	10 days	1									1							autoimmune cirrhosis		1		1	1			11		1		1	0	155	26	3	107	7.1	78.6	14.8
678	57	female	70		1. new type Cryptococcus Sepsis 2.central nervous system infection new type cryptococcal Meninges...	1.Disseminated cryptococcosis2. autoimmune cirrhosis3.腹水4.splenomegaly5.胰腺占位6....	Infection ward(6A-12)	2017-11-08	2017-11-13	5	167/60	half months							1			1							蛛网膜下腔出血	1				1			1		1		1	0	450	2	3	119	4.9	65.4	23.9
679	15	female	21		1.蛛网膜下腔出血 3.大脑中动脉动脉瘤 右侧大脑中动脉M2...	1.蛛网膜下腔出血2.大脑中动脉动脉瘤3.Pulmonary cryptococcosis5.获得性免疫缺陷...	Infection ward(9-3)	2017-11-09	2017-12-06	27	174/80	1months	1	1							1								银屑病	1			1	1			1		1		1	0	350	0	2.6	123	2.6	81.2	13.7
680	18	male	50		1.cryptococcal meningitis 2.HIV病 3.高...	1.cryptococcal meningitis2.AIDS3.hypertension 4.银屑病5.皮...	Infection ward(9-3)	2017-11-10	2017-12-18	38	165/64	half months	1	1		1							1	1					阵发性睡眠性血红蛋白尿症		1			1		1		1		1		0	195	50	1.4	108	7.7	93.9	2.3
681	50	female	48			1.cryptococcal meningitis	Infection ward(6A-9)	2017-11-13	2017-12-06	23
682	-31	male	60			1.pulmonary tuberculosis瘤，病理（+）2.Pulmonary cryptococcosis	Chest Tumor Ward(6B-19)	2017-11-14	2017-11-14	1
683	8	male	29		1.fever of unknown origin infectious？免疫性？neoplastic？2.阵发性睡眠性血红蛋...	1.cryptococcal meningitis2.阵发性睡眠性血红蛋白尿症3.视网膜静脉阻塞5.中...	Infection ward(6A-11)	2017-11-17	2017-12-14	27	160/46	half months	1			1							1						结缔组织病		1			1			1		1		1	0	160	50	0.6	94	10.2	90.6	5.1
684	23	female	75		1.fever of unknown origin infectious？免疫性？neoplastic？2.结缔组织病 干燥综...	1.cryptococcal meningitis2.原发性闭角 type glaucoma 3.结缔组织病4.pulmonary infection5....	Infection ward(6A-12)	2017-11-20	2017-12-12	22	162/68	1months+					1					1									1				1		1		1		1	0	150	0	4.1	130	3.4	46.1	41.1
685	23	male	48		1.肺cryptococcosis 2.viral hepatitis B	1.肺cryptococcosis2.viral hepatitis B	Respiratory Internal Medicine Ward(2-16)	2017-11-24	2017-11-30	6	158/65	12 days	1	1								1									1			1			1		1		1	0	370	445	3	116	7.6	85.8	9.1
686	15	female	45		1.intracranial infection	1.cryptococcal meningitis	Infection ward(6A-10)	2017-11-24	2017-12-13	19	152/38	20+ days	1	1								1									1		1	1			1		1		1	拒绝					7	78	11.1
687	61	male	47		1.pulmonary infection cryptococcosis	1.Pulmonary cryptococcosis	Infection ward(6A-12)	2017-11-28	2017-12-01	3
688	39	female	82		1.发热 2.hypertension	1.cryptococcal meningitis2.hypertension 3.hepatitis B表面抗原携带者	Infection ward(6A-6)	2017-12-01	2017-12-07	6	162/67	2months+					1						1								1		1		1		1		1		1	0	110	0	4.3	125	4.6	62.2	29
689	12	male	46		1.肺cryptococcosis 2.焦虑症 3.hepatitis B表面抗原携带者	1.肺cryptococcosis2.焦虑症3.hepatitis B表面抗原携带者	Respiratory Internal Medicine Ward(2-14)	2017-12-06	2017-12-19	13	168/71	2 weeks							1				1		1					1					1		1		1		1	0	110	1	3.6	120	5.7	80.3	8.8
690	10	male	47		1.AIDS 2.Prostatic hyperplasia tuberculosis？tumor？3.肺...	1.AIDS2.耶氏肺孢子菌 pneumonia3.cryptococcosis4.肝血管瘤5...	Infection ward(9-3)	2017-12-06	2018-01-08	33	150/49	1months					1					1				1		1			1				1		1	1		1		0	170	0	4.1	127	5.3	59.3	29.8
691	5	female	61		1.Pulmonary cryptococcosis	1.Pulmonary cryptococcosis	Respiratory Internal Medicine Ward(2-16)	2017-12-13	2017-12-14	1
692	30	female	61		1.Lungs病灶 Pulmonary cryptococcosis Consider first3.viral hepatitis B 4.原发...	1.Pulmonary cryptococcosis2.viral hepatitis B3.原发性肝癌4.肝移植状态5.hypertension...	Respiratory Internal Medicine Ward(2-16)	2017-12-13	2017-12-25	12	161/47	20+ days		1		1					1										1		1	1			1		1		1		160	25	3.3	114	4.6	64.1	26.4
693	9	female	66	complete	1.cryptococcal meningitis 2.动脉粥样硬化 Bilateral 股动脉、Bilateral 颈动脉...	1.cryptococcal meningitis2.动脉粥样硬化3.Bilateral thyroid node 4. hyponatremia 5.低...	Infection ward(6A-11)	2017-12-18	2018-01-04	17	175/65	1months+		1		1						1								1			1	1			1		1		1	1	400	1	1.7	105	3.9	71.7	22.6
694	15	male	52		1.Headache to be investigated 2.cryptococcal meningitis 3.syphilis 4.获得性免疫缺...	1.cryptococcal meningitis2.syphilis3.AIDS	Infection ward(9-3)	2017-12-21	2018-01-02	12	167/69	1 weeks	1			1							1							1			1	1			1		1		1	0	80	25	2.2	116	2.3	60.3	12.8
695	11	male	57		1.fungous食管炎 2. diarrhea 3.发热	1.AIDS2.fungous食管炎3.肺cryptococcosis4. cryptococcal 脑...	Infection ward(9-3)	2017-12-25	2018-02-06	43	163/63	2 days								1			1	1					干燥综合征		1		1		1		1		1		1	0	180	1	5.5	125	6.1	75.2	19
696	33	female	68		1.pulmonary infection cryptococcosis Consider first2.type 2 diabetes伴多并发症 3...	1.Pulmonary cryptococcosis3.type 2 diabetes伴多并发症4.hypertension 6.rheumatoid arthritis7....	Respiratory Internal Medicine Ward(2-14)	2017-12-26	2018-01-09	14	173/75	1 weeks		1								1									1		1	1			1		1		1	0	＞400	50	0.69	106.1	6.7	50.3	35.1
697	17	male	67	in progress	1.cryptococcal meningitis 2.hypertension	1.cryptococcal meningitis2.Lungs chronic inflammation3.thyroid node 4.脑缺血性改变5.高...	Infection ward(6A-8)	2017-12-27	2018-01-22	26	卧床	1 weeks	1			1			1				1	1							1		1	1			1		1		1	1	125	90	0.5	111	5.8	78.9	14.2
698	-7	female	83		1.cryptococcal meningitis 2.fungous pneumonia 3.hypertension 4.2 type 糖...	1.cryptococcal meningitis2.化脓性Meninges encephalitis3.fungous pneumonia4.hypertension 5.2 type ...	Infection ward(6A-9)	2017-12-27	2018-01-15	19
699	32	male	40	complete	1.Pulmonary cryptococcosis	1.Bilateral lung lesions2.肺cryptococcosis	Respiratory Internal Medicine Ward(2-16)	2018-01-04	2018-01-17	13
700	11	male	70		1.cryptococcal meningitis 2.thyroid node 两侧3.Hepatic cyst	1.cryptococcal meningitis2.thyroid node 3.Hepatic cyst	Infection ward(6A-10)	2018-01-04	2018-01-11	7	178/65	14	1	1							1										1		1	1			1		1		1		270	130	2.4	113.2	10.4	75.6	17.7
701	3	male	36	in progress	1.AIDS 2.fever of unknown origin 3.intracranial infection viral...	1.AIDS2.cryptococcal meningitis3.syphilis4.EB virus infection 6....	Infection ward(9-3)	2018-01-11	2018-02-13	33	173/60	7	1							肢体活动障碍/口角歪斜	1								syphilis	1				1			1		1		1		270	3	2.5	108	5.3	70.9	19.7
702	56	male	83	complete	1.cryptococcal meningitis 2.Secondary pulmonary tuberculosis 3.Hepatic cyst 4.肾囊肿...	1.cryptococcal meningitis2.菌血症3.Hepatic cyst4.肾囊肿5.肾结石6.前列腺增...	Infection ward(6A-6)	2018-01-15	2018-01-23	8	170/60	20		1		1							1		陈旧性肺结核						1		培养阳性	1			1		1		1		70	130	1.5	117	5.9	81.5	8.5
703	32	female	16	complete	1.cryptococcal meningitis 2.脑积水	1.cryptococcal meningitis2.脑积水3.癫痫	Infection ward(6A-10)	2018-01-19	2018-02-06	18	162/44	120		1		1			1		1										1		1	1			1		1		1		600	42	0.6	122	8	83	12.3
704	7	female	28	complete	1.Headache to be investigated Cryptococcus tuberculosis？病毒？静脉窦血栓？	1.cryptococcosis2.hypokalemia3.致密性骨炎4.Cryptococcal pneumonia5. cryptococcal Meninges...	Infection ward(6A-8)	2018-01-24	2018-02-23	30	155/58	30				1				视物模糊		1									1		1	1			1		1		1		310	90	3	126	9.1	62.3	29
705	39	male	56	complete	1.cryptococcal meningitis 全脑VP分流 postoperative 2.腔隙性cerebral infarction 3.脑...	1.Cryptococcal encephalitis2.腔隙性cerebral infarction3.cerebral infarction后遗症4.pulmonary infection5.hypertension...	Infection ward(6A-11)	2018-01-30	2018-02-23	24	170/卧床	30		1					1			1							高血压		1		1	1			1		1		1		160	95	2.5	120	8	77.5	13.5
706	19	male	43	in progress	1.AIDS 2.fever of unknown origin	1.AIDS2.肺cryptococcosis3.肾结石	Infection ward(9-3)	2018-01-30	2018-02-12	13	173/60	4	1									1								1			1		1		1		1		1						7	78.5	10.5
707	6	male	61	complete	1.Headache to be investigated 2.cirrhosis 3.Chronic viral hepatitis B	1.cryptococcal meningitis2.Hepatitis B cirrhosis3.幻觉症	Infection ward(6A-9)	2018-01-30	2018-02-07	8	170/60	15	1	1						恶心		1			1						1		1	1			1		1		1		260	230	2.7	107	8.7	89	3.2
708	27	male	24		1.Lungs阴影 （bacterial？tuberculosis？ fungus ？tumor？)2.甲亢	1.Pulmonary cryptococcosis2.thyroid功能亢进3.fatty liver	Respiratory Internal Medicine Ward(2-16)	2018-02-02	2018-02-07	5	175/82	15	1				1					1									1		1		1		1		1		1						8.2	75.6	15.9
709	1	male	40		1. pneumonia Pulmonary cryptococcosis Consider first	1.Pulmonary cryptococcosis	Respiratory Internal Medicine Ward(2-14)	2018-02-02	2018-02-13	11	170/74	30					1					1									1		1		1		1		1		1						6	49.6	39.9
710	28	male	74		1.颅内多发病灶 yet to be investigated 2.hypertension 3.cerebral infarction后遗症	1.cryptococcal meningitis2.脑积水3.hypertension 4.cerebral infarction后遗症	Neurosurgery ward(5-9)	2018-02-06	2018-02-08	2	卧床	150	1	1			1					1							高血压/脑梗				1	1			1		1		1		360	35	0.4	122	6.9	89.5	6.3
711	33	female	39		1.Pulmonary nodule cryptococcosis？	1.肺cryptococcosis	Respiratory Internal Medicine Ward(2-14)	2018-02-08	2018-02-23	15	164/55	10								胸痛			1（空洞）								1		1		1		1		1		1						6.1	71.8	23.5
712	30	male	34		1.Pulmonary cryptococcosis	1.Pulmonary cryptococcosis2. abnormal liver function 3.高甘油三酯血症	Respiratory Internal Medicine Ward(2-14)	2018-02-09	2018-02-23	14	178/85	30					1						1（空洞）								1		1		1		1		1		1						9.7	76.9	16
713	36	male	35		1.Pulmonary cryptococcosis	1.Pulmonary cryptococcosis2.痔疮	Respiratory Internal Medicine Ward(2-14)	2018-02-11	2018-02-22	11	173/79	90										1									1		1		1		1		1		1						6	63.5	29.9
714	12	male	31	in progress	1.AIDS 2. disturbance of consciousness 3.intracranial infection 首先考...	1.AIDS2.Cryptococcal encephalitis3.cryptococcal meningitis4.口腔 fungus ...	Infection ward(9-3)	2018-02-13	2018-03-22	37	170/45	3	1	1		1	1		1			1								1			血培养隐球阳性	1			1		1		1		160	10	3.2	117	2.2	83.5	4
715	3	male	47		1.AIDS ？2.cryptococcal meningitis	1.AIDS2.Cryptococcal encephalitis4. pneumonia5.cerebral hernia6.电解质代谢...	negative pressure ward(9-5)	2018-02-13	2018-03-09	24	160/54	10		1		1				视物模糊		1								1			1	1			1		1		1		400		1.2	120	4.1	76.9	7.3
716	39	female	37	complete	1.cryptococcal meningitis 2.systemic lupus erythematosus Lupus nephritis 中度贫血	1.cryptococcal meningitis2.systemic lupus erythematosus	Infection ward(6A-12)	2018-02-14	2018-02-26	12	163/卧床	60	1	1							1								SLE/SLE肾炎		1		1	1		1		1			1	1	400	110	0.3	109.2	9.8	92.6	4.6
717	17	male	26	in progress	1.AIDS 初筛阳性2.卡氏肺孢子菌 pneumonia	1.AIDS2.卡氏肺孢子菌 pneumonia3. new type Cryptococcus Sepsis4.房...	Infection ward(9-3)	2018-02-28	2018-03-29	29	175/59	14	1				1	1					1							1			1		1		1		1		1						1.5	64.2	30.3
718	8	male	43		1.血肌酐升高 2.renal transplant state 3.高脂血症 4.cryptococcosis	2.renal transplant state3. virus infection 4.血肌酐升高5.高脂血症6.cryptococcosis	renal transplantward(6B-7)	2018-02-28	2018-03-07	7	173/60	30	1									1（空洞）						renal transplant	高血压		1		1		1	1		1		1							6.9	82.4	11.4
719	20	male	22	complete	1.cryptococcal meningitis 2.Lungs病灶 左肺下叶 node ，炎性 node 可能...	1.cryptococcal meningitis2.左下Pulmonary nodule3.肺动脉高压重度4.免疫性血小板减少...	Infection ward(6A-11)	2018-03-01	2018-03-27	26	183/62	60		1					1	视物成双		1							免疫性血小板减少症		1		1	1			1		1		1	1	＞400	88	0.79	120	7.3	70	13
720	5	male	47		1.肺cryptococcosis 2.diabetes 3.hypertension	1.肺cryptococcosis3.hypertension	Infection ward(6A-11)	2018-03-05	2018-03-06	1	172/80	4										1							高血压		1		未做（ postoperative 病理提示 Cryptococcus ）		1		1		1		1						4.1+AU663:AY66AU663:AW663	58.6	20.7
721	7	male	32	complete	1.cryptococcal meningitis 2.强直性脊柱炎 3.diabetes	1.cryptococcal meningitis2.强直性脊柱炎3.diabetes4.fatty liver5.Pulmonary nodule	Infection ward(6A-10)	2018-03-26	2018-04-09	14	168/60	8	1	1								1（空洞）		1					强制性脊柱炎		1		1	1		1		1			1		250	505	5.1	107	7.1	57	27
722	9	male	28	complete	1.AIDS 初筛阳性2.fever of unknown origin tuberculosis？3.淋...	1.AIDS2.tuberculosis病3.cryptococcosis4.syphilis5.巨细胞病毒感...	Infection ward(9-3)	2018-03-27	2018-04-26	30	171/62	10	1				1			头晕			1		1					1			1		1		1		1		1						6.2	72.8	17.4
723	27	female	41		1.cryptococcal meningitis 2.腔隙性cerebral infarction 3.颈椎病 4.低钾血...	1.cryptococcal meningitis2.腔隙性cerebral infarction3.颈椎病4.hypokalemia	Infection ward(6A-10)	2018-03-29	2018-04-24	26	155/45	30		1							1										1		1	1			1		1		1		105	10	1.4	124	7.8	79.3	12
724	10	male	24	complete	1.AIDS 2.cryptococcal meningitis 3.痔疮	1.AIDS2.cryptococcal meningitis3.痔疮4.EB virus infection 5....	Infection ward(9-3)	2018-03-29	2018-04-23	25	183/67	7	1	1		1					1									1			1	1			1		1		1	1	160	20	3	122	4	46.5	15.1
725	2	male	36	complete	1.cryptococcal meningitis 2.AIDS 3.tuberculosis病 4...	1.AIDS2.cryptococcal meningitis3.tuberculosis病4. pneumonia5.syphilis6...	Infection ward(9-3)	2018-04-02	2018-04-27	25	172/75	30		1									1		1					1			1	1			1		1		1		130	0	3.2	124	2.5	42.5	21.8
726	17	female	71		1.Intracranial space occupying lesions 性质 yet to be investigated encephalitis？2.Pulmonary cryptococcosis 3.多发...	1.颅内多发病灶 yet to be investigated2.Pulmonary cryptococcosis3.多发性骨髓瘤4.type 2 diabetes5.乙...	Neurological Second Ward(7-4)	2018-04-09	2018-05-09	30
727	53	female	63	complete	1.cryptococcal meningitis 2.hypertension 3 level 3.低蛋白血症 4.贫...	1.cryptococcal meningitis5.蛛网膜囊肿6.Cryptococcal encephalitis	Infection ward(6A-12)	2018-04-12	2018-04-20	8	158/55	18	1	1						视物模糊	1								高血压/hepatitis B		1		1	1			1		1		1		380	260	2.84	122.9	6.6	78.3	13
728	20	male	24	complete	1.AIDS 2.卡氏肺孢子菌 pneumonia 3.巨细胞病...	1.AIDS2.卡氏肺孢子菌 pneumonia3.cryptococcosis4.巨细胞病毒...	Infection ward(9-3)	2018-04-13	2018-05-03	20	173/68	15	1				1	1					1							1			1		1		1		1		1						7.5	68.1	19.1
729	35	male	58	complete	1.cryptococcal meningitis 2.大脑后动脉狭窄 left P3段3.颈动脉...	1.cryptococcal meningitis2.大脑后动脉狭窄3.颈动脉硬化4.maxillary sinusitis	Infection ward(6A-9)	2018-04-16	2018-04-25	9	160/49	150		1						视物模糊		1									1		1	1			1		1		1		170	60	3.8	122	5.3	82.1	10.3
730	36	female	73	complete	1.cryptococcal meningitis 2.ANCA相关性血管炎 3.ANCA相...	1.cryptococcal meningitis2.ANCA相关性血管炎3.ANCA associated nephritis4.高...	Infection ward(6A-9)	2018-04-18	2018-05-10	22	卧床	9	1	1					1			1							ANCA相关性血管炎、肾炎		1		1	1		1		1		1			200	9	1.93	110.1	5.3	83.9	11.9
731	-10	male	40			1.pulmonary infection2.Bilateral lung lesions3.肺cryptococcosis	Respiratory Internal Medicine Ward(2-14)	2018-04-19	2018-04-19	1	165/54	30					1						1								1		1		1		1		1		1						10.1	83.5	10.1
732	17	male	56		1.肺占位 infection ？tumor？2.肝癌 射频消融 postoperative 3.Hepatitis B cirrhosis...	1.cryptococcosis2.肝癌3.Chronic viral hepatitis B4.Hepatitis B cirrhosis5.After splenectomy...	Infection ward(6A-6)	2018-04-24	2018-05-02	8	170/64	15					1					1（空洞）		1		肝癌消融 postoperative			hepatitis B		1		1		1		1		1		1						5.3	38.8	43.4
733	6	male	24	complete	1.AIDS 初筛阳性2.pulmonary infection	1.AIDS2.cryptococcosis3.巨细胞viral视网膜炎4.肺隐球...	Infection ward(9-3)	2018-04-25	2018-06-21	57	170/51	21	1				1						1							1			1		1		1		1		1						2.2	72.3	20.5
734	58	female	84	complete	1.pulmonary infection fungus Consider first2.支气管扩张伴 infection 3.冠状动脉...	1.Pulmonary cryptococcosis2.低蛋白血症3.支气管扩张伴 infection 4.胆囊结石5.冠状动...	Infection ward(6A-6)	2018-04-30	2018-05-18	18	150/55	30	1				1						1						rheumatoid arthritis /高血压/冠心病/睡眠障碍		1		1		1		1		1		1						6.4	73	19.1
735	8	male	49	complete	2.fever of unknown origin intracranial infection？3.Hepatitis B cirrhosis	1.AIDS2.cryptococcal meningitis3.cirrhosisDecompensation5.EB病...	Infection ward(9-3)	2018-04-30	2018-05-28	28	160/63	2	1	1							1								hepatitis B	1			1	1			1		1		1		220	220	3.5	120	5.3	76.3	12.5
736	10	female	48	complete	1.Headache to be investigated 2.fever of unknown origin	1.AIDS2.Cryptococcal encephalitis3.pulmonary infection4.尿路 infection 5.贫...	Infection ward(9-3)	2018-05-09	2018-06-08	30	160/60	5	1	1		1							1							1			1	1			1		1		1		300	2	3	127	4.7	67.3	23.8
737	23	female	50		1.肺cryptococcosis Consider first2.卵巢癌 postoperative 3.精神分裂症	1.肺cryptococcosis2.卵巢癌3.精神分裂症	Respiratory Internal Medicine Ward(2-16)	2018-05-11	2018-05-21	10	165/77.5	20					1						1						精神分裂		1		1		1		1		1		1						9.2	77.6	16.7
738	50	female	66	complete	1.intracranial infection cryptococcosis？2.干燥综合征伴肺间质纤维化 3....	1.cryptococcal meningitis2.干燥综合征伴肺间质纤维化3.血管炎4.cirrhosis（失...	Infection ward(6A-11)	2018-05-15	2018-06-08	24	160/50	30	1	1		1						1							免疫性血管炎		1		1	1		1		1			1		400	12	0.3	108	4.5	83.9	8.8
739	12	male	37	complete	1.AIDS 初筛阳性2.pulmonary infection PCP consider	1.AIDS2.卡氏肺孢子菌 pneumonia3.Hepatitis B肝炎 Virus carrying 者4....	Infection ward(9-3)	2018-05-18	2018-05-29	11	174/63	7	1				1						1							1			1		1		1		1		1		100	0	4.2	116	3.2	64	28.6
740	39	male	47		1.Lungs病灶 inflammation ？tuberculosis？tumor？2.双相情感障碍，目前为缓解...	1.cryptococcosis2.双相情感障碍，目前为缓解状态3.fatty liver4.肾囊肿	Respiratory Internal Medicine Ward(2-16)	2018-05-21	2018-05-24	3	180/88	30										1							双相障碍		1		1		1		1		1		1						5.4	51.3	37.5
741	27	male	68	complete	1.cryptococcal meningitis 2.pulmonary infection tuberculosis? Cryptococcus	1.cryptococcal meningitis2.pulmonary infection	Infection ward(9-4)	2018-05-21	2018-06-21	31	170/69	30	1	1		1							1								1		1	1			1		1		1		140	40	3.4	121	9.4	91.4	6.9
742	32	female	27		1.pulmonary infection Cryptococcus 疑似2.viral hepatitis B 3.thyroid node	1.Pulmonary cryptococcosis2.viral hepatitis B3.thyroid node	Respiratory Internal Medicine Ward(2-14)	2018-05-25	2018-06-05	11	165/65	15					1						1（空洞）						hepatitis B		1		1		1		1		1		1						6.4	69.5	19.9
743	55	female	63	complete	1.脑积水 2.Cryptococcal encephalitis	1.cryptococcal meningitis2.金黄色葡萄球菌 infection 3.脑动脉瘤4.脑积水5.脑梗...	Infection ward(6A-9)	2018-05-28	2018-07-05	38
744	15	male	66			1.cryptococcosis2.冠心病	General Thoracic Surgery Ward(5-5)	2018-05-30	2018-06-07	8		6 year										1							高血压/冠心病		1		0（手术病理确诊）		1		1		1		1						6.1	64.2	25.9
745	15	female	52	in progress		1.AIDS2.卡氏肺孢子菌 pneumonia3.Pulmonary cryptococcosis4.低蛋白血...	Infection ward(9-3)	2018-05-30	2018-06-28	29	157/44	7	1										1							1			1		1		1		1		1						4.8	71.6	20.1
746	36	female	57	complete	1. chronic 加急性liver failure 2.Chronic viral hepatitis B 3.系统性红斑狼...	1. chronic 加急性liver failure2.Chronic viral hepatitis B3.心力衰竭4.cryptococcosis5.肺...	Infection ward(6A-11)	2018-06-07	2018-06-11	4	155/41.5	30	1							hepatitis B/cirrhosis		1					lymphoma		SLE/高血压		1		1		1	1		1			1						10.1	92	2.4
747	35	male	53	complete	1.肝炎cirrhosis（失代偿性），Hepatitis B 3.chronic kidney disease 4.腹水	1.Disseminated cryptococcosis2.肝炎cirrhosis（失代偿性），Hepatitis B3.chronic kidney disease4.隐球...	Infection ward(6A-6)	2018-06-11	2018-06-22	11	173/63	15	1										1						肾病		1		1	1			1		1		1		130	80	3.2	124	2.7	74	15.4
748	-1	male	45			1.Pulmonary cryptococcosis2.亚临床thyroid功能亢进	Respiratory Internal Medicine Ward(2-14)	2018-06-14	2018-06-14	1
749	11	male	26	complete	1.AIDS 2.cryptococcal meningitis	1.AIDS2.cryptococcal meningitis3.EB virus infection 4. pneumonia5....	Infection ward(9-3)	2018-06-17	2018-07-06	19		15		1						体重下降		1								1				1			1		1		1	1	285				2.2	66.1	20.7
750	18	male	63		1.恶性tumor放射治疗后随诊检查 2.lung cancer postoperative left 3.Lungs感...	2.pulmonary infection3.lung cancer postoperative 4.Chronic viral hepatitis B5.pulmonary tuberculosis6.cryptococcosis7...	Radiotherapy Ward(6B-10)	2018-06-19	2018-07-12	23
751	13	male	39	complete	1.AIDS 初筛阳性2.cryptococcal meningitis	1.AIDS2.cryptococcosis3.pulmonary infection4.giant cell virus infection 5....	Infection ward(9-3)	2018-06-21	2018-07-19	28	175/70	15		1		1						1（空洞）								1			1	1			1		1		1	1	＞400	3	3.3	121	5.9	72.4	17.4
752	3	male	50	complete	1.AIDS 2.Secondary pulmonary tuberculosis 上中/上 涂阴 ...	1.AIDS2.cryptococcosis3.Secondary pulmonary tuberculosis4.tuberculosis 胸膜炎5...	Infection ward(9-3)	2018-06-21	2018-07-13	22	183/49	60	1				1						1		1					1			1		1		1		1		1						1.7	68.7	18.3
753	10	female	56		1.pulmonary infection 2.hypertension	1.Pulmonary cryptococcosis2.hypertension 2 level 3.十二指肠憩室	Respiratory Internal Medicine Ward(2-14)	2018-06-28	2018-07-03	5	164/61	15	1				1			头晕		1							高血压		1		1		1		1		1		1						5.1	67.3	27.1
754	5	male	57		1. community acquired pneumonia， Non critical 2.精神分裂症	1.Pulmonary cryptococcosis2.精神分裂症3.Bilateral thyroid node 4.hepatitis B表面抗原携带者	Respiratory Internal Medicine Ward(2-16)	2018-06-28	2018-07-16	18	170/80	7	1				1						1						精神分裂/hepatitis B		1		1		1		1		1		1						17.7	82.8	11.8
755	11	female	60		1.Lungs阴影 infection ？tuberculosis？tumor？	1.肺cryptococcosis2.thyroid node	Respiratory Internal Medicine Ward(2-14)	2018-06-29	2018-07-03	4	158/44.5	30											1								1		1		1		1		1		1						5.1	44.2	46.3
756	8	male	28	complete	1.AIDS 2.pulmonary infection	1.AIDS2.cryptococcosis3.pulmonary infection4.腹膜炎5.肠梗阻6...	Infection ward(9-3)	2018-07-02	2018-07-30	28	170/50	30	1							乏力/消瘦			1		1				hepatitis B	1			1		1		1		1		1						1.5	84.8	9.9
757	53	male	51		1.cryptococcal meningitis 2.viral hepatitis B	1.Cryptococcal encephalitis2.Chronic viral hepatitis B3.Hepatic cyst4.肾囊肿5.左室舒张...	Infection ward(6A-12)	2018-07-06	2018-07-16	10	168/57	60		1						视物双影	1										1		1	1			1		1		1		250	20	2	111	6.7	76.9	15.6
758	3	female	61	complete	1.意识不清 yet to be investigated tuberculosis Meninges encephalitis？viralmeningitis？2.继发 type 肺...	1.Cryptococcal encephalitis2.脑积水3.tuberculosis Meninges encephalitis4.Secondary pulmonary tuberculosis5.泌尿系...	negative pressure ward(9-5)	2018-07-09	2018-09-05	58	158/卧床	2	1			1			1				1	1	1				Rheumatic 关节炎		1		1	1		1		1			1		190	70	2.1	122	8	78.9	11
759	12	male	31		1.Lungs病灶 pneumonia？tuberculosis？cryptococcosis？	1.Pulmonary cryptococcosis2.fatty liver	Respiratory Internal Medicine Ward(2-14)	2018-07-10	2018-07-16	6	170/76	150	1				1					1									1		1		1		1		1		1						6.5	47.3	39.9
760	19	male	45	complete	1.cryptococcal meningitis 2.AIDS 初筛阳性	1.AIDS2.cryptococcosis4.胸腔积液5.水痘6. cryptococcal 脑...	Infection ward(9-3)	2018-07-11	2018-08-13	33
761	16	female	65		1.nature of lung lesions to yet to be investigated fungus ？tuberculosis？非infectious？2.hypertension3 level	1.Pulmonary cryptococcosis2.hypertension3 level	Respiratory Internal Medicine Ward(2-16)	2018-07-11	2018-07-24	13	158/62	14					1	1				1							高血压		1		1		1		1		1		1						6.8	62.5	28.7
762	15	female	44	complete	1.Cryptococcal encephalitis 2.systemic lupus erythematosus	1.Cryptococcal encephalitis2.systemic lupus erythematosus	Infection ward(6A-11)	2018-07-13	2018-08-10	28	163/54.5	14		1		1						1							SLE		1		1	1		1		1		1			170	0	3.5	114	7.6	73.6	19.4
763	12	male	31	complete	1.AIDS	1.AIDS2.cryptococcosis3.cryptococcal meningitis4.Pulmonary cryptococcosis5...	Infection ward(9-3)	2018-07-13	2018-08-13	31	175/80	7		1					1				1							1			1	1			1		1		1		＞400	5	1.9	114	4.6	74.2	14.8
764	53	female	38		1. pneumonia cryptococcosis	1.cryptococcosis2.肾结石	Infection ward(6A-12)	2018-07-16	2018-07-18	2	161/58	30					1	1				1									1		1		1		1		1		1						8.2	69	24
765	22	male	89	complete	1.cryptococcal meningitis 2.chronic kidney disease 3.hypertension 4.胆囊结石...	1.cryptococcal meningitis2.chronic kidney disease3.hypertension 4.胆囊结石伴 chronic 性胆囊炎5....	Infection ward(6A-12)	2018-07-19	2018-08-01	13	170/50	14	1							头晕	1								高血压		1		1（CSF）	1			1		1		1		100	200	2.8	110	6.5	75.9	14.4
766	2	female	30		1.nephrotic syndrome，系膜增殖性肾小球肾炎 伴C3沉积2.1 type 糖尿...	1.nephrotic syndrome，系膜增殖性肾小球肾炎2.1 type diabetes3. chronic 性Hepatitis Bviral肝...	Kidney Disease WardSecond Ward(6B-9)	2018-07-19	2018-07-30	11		14	1	1		1	1	1					1	1					nephrotic syndrome/hepatitis B		1		1	1		1		1		1			＞200	5	2.8	127	7.1	84.7	12
767	-6	male	47			1.Pulmonary cryptococcosis	Infection ward(6A-12)	2018-07-26	2018-07-27	1	170/79	90										1							高血压		1		0		1		1		1		1						14	83.2	12.4
768	51	male	47	complete	1.cryptococcal meningitis 2.hypertension	1.cryptococcal meningitis2.hypertension 3.hypokalemia4.急性肾功能损害5.Pulmonary nodule...	Infection ward(6A-12)	2018-07-27	2018-08-06	10	170/75	30	1	1							1								高血压		1		1	1			1		1		1		265	150	2.3	125	8.6	62.1	25.4
769	57	female	52		1.两Pulmonary nodule infection ？tuberculosis？tumor？	1.Pulmonary cryptococcosis2.白细胞减少 yet to be investigated3.thyroid node	Respiratory Internal Medicine Ward(2-14)	2018-08-01	2018-08-07	6	162/63	10						1		胸痛			1								1		1		1		1		1		1						2.6	49.8	34.2
770	27	male	59	complete	1.Pulmonary cryptococcosis 2.cryptococcal meningitis 3. rheumatoid arthritis	1.cryptococcal meningitis2.Pulmonary cryptococcosis3. rheumatoid arthritis 4.Hepatic cyst5.椎间盘...	Infection ward(6A-12)	2018-08-02	2018-08-23	21	170/58	60	1				1			头晕		1							Rheumatoid Arthritis		1		1	1		1		1		1			160	2	3.4	105	7.2	73.5	13.6
771	1	male	54		1.左肺病灶 cryptococcosis，tumor？2.心脏瓣膜病 3.主动脉瓣...	1.Pulmonary cryptococcosis2.心脏瓣膜病3.主动脉瓣换瓣 postoperative 4.二尖瓣换瓣 postoperative 5....	Lung transplantationward(6B-19)	2018-08-08	2018-08-13	5
772	17	male	56	complete	1.化脓性meningitis 2.non-Hodgkin's lymphoma Peripheral T cells -非特指 type	1.cryptococcal meningitis2.non-Hodgkin's lymphoma3.前列腺 node	Infection ward(6A-10)	2018-08-14	2018-08-27	13	165/60	10	1	1								1					lymphoma				1		1	1			1		1		1		110	150	2.8	118	5.1	55.3	24.8
773	8	male	56		1.Lungs阴影 机化性 pneumonia？tumor？tuberculosis？2.pulmonary infection 3.胃间...	1.Pulmonary cryptococcosis2.Lungs阴影3.胃间质瘤4.left 胸腔积液	Respiratory Internal Medicine Ward(2-14)	2018-08-14	2018-08-29	15	168/60	30	1				1	1		咯血		1									1		0		1		1		1		1						16.7	73.4	20.2
774	1	male	50	complete	1.AIDS 初筛阳性2.intracranial infection	1.AIDS2.cryptococcal meningitis3. intracranial hypertension 4.肠梗阻6....	Infection ward(9-3)	2018-08-14	2018-09-12	29	168/卧床	4	1			1				头晕		1								1			1	1			1		1		1		400	2	2.2	115	4.1	69.1	21.6
775	11	female	71	complete	1.cryptococcal meningitis Meninges encephalitis2.hypertension	3.cryptococcal meningitis4.hypertension	Infection ward(6A-12)	2018-08-17	2018-09-14	28	160/42	75	1	1					1		1								高血压		1		1	1			1		1		1		68	60	1.4	110	7.6	75.3	14.3
776	20	male	62		1.nephrotic syndrome，膜性肾病 II phase 2.Headache to be investigated 3.继发性糖尿...	1. chronic 性肾小球肾炎2.nephrotic syndrome3.chronic kidney disease-II phase 4. cryptococcal Meninges...	Kidney Disease Ward oneward(6B-8)	2018-08-20	2018-09-11	22	160/57	90		1								1		1					nephrotic syndrome/高血压		1		1	1		1		1		1			98	80	1.2	113	6.9	81.6	14.9
777	22	female	44		1.systemic lupus erythematosus 2.hypokalemia	1.systemic lupus erythematosus2.Pulmonary cryptococcosis3.肝功能不全4.hypokalemia5.窦性心动...	Rheumatic Immune Ward(2-19)	2018-08-22	2018-09-04	13	156/49.5	14											1						SLE		1		1		1		1		1		1						2.2	58	26.8
778	33	male	40		1.pulmonary infection Cryptococcus 烟曲霉？tuberculosis？	1.Pulmonary cryptococcosis	Respiratory Internal Medicine Ward(2-14)	2018-08-23	2018-08-30	7	183/88	30					1					1									1		1		1		1		1		1						6.5	71.6	18
779	7	female	72	complete	1.type 2 diabetes 2.diabetes周围神经病变 3.diabetes神经病变 ...	1.肺cryptococcosis2.type 2 diabetes3.diabetes周围神经病变4.diabetes神经病变...	Respiratory Internal Medicine Ward(2-14)	2018-08-29	2018-09-11	13	156/62	90								乏力/消瘦		1		1					高血压/结缔组织病		1		1		1		1		1		1						9.9	70	19.3
780	7	male	51	complete	1.fever of unknown origin 2.diabetes	1.Cryptococcal encephalitis2.type 2 diabetes3.Hepatic cyst4.胆囊结石伴 chronic 性胆囊炎	Infection ward(6A-9)	2018-08-30	2018-09-07	8	160/54	15	1	1							1			1							1		1	1			1		1		1	1	220	210	1.4	111	5.2	59.9	59
781	53	female	22	complete	1.cryptococcosis 2.多发性大动脉炎 3.贫血	1.cryptococcosis2.多发性大动脉炎3.轻度贫血4.胆囊息肉	Infection ward(6A-12)	2018-08-31	2018-09-04	4
782	36	male	46		1.两Pulmonary nodule 多发，tumor？tuberculosis？ infection ？2.fatty liver 3. chronic 性胃...	1.Pulmonary cryptococcosis2.fatty liver3. chronic 性胃炎	Respiratory Internal Medicine Ward(2-14)	2018-08-31	2018-09-07	7	168/72	30										1									1		1		1		1		1		1						4.6	59.7	32.6
783	20	male	30	complete	1.cryptococcal meningitis	1.cryptococcal meningitis2.aortic insufficiency	Infection ward(6A-10)	2018-08-31	2018-09-03	3	172/60	10	1	1		1						1(空洞）									1		1	1			1		1		1	1					12.5	87	5.5
784	-5	male	30		1.肺占位性病变 Cryptococcal Consider first	1.Pulmonary cryptococcosis2.二三尖瓣返流	Infection ward(6A-12)	2018-09-03	2018-09-06	3	176/61.5	180										1									1		1		1		1		1		1						5.4	57	32.2
785	19	male	42	complete	1.AIDS 2.巨细胞viral视网膜炎 左眼3....	1.AIDS2.巨细胞viral视网膜炎3.cryptococcosis4.肺隐球...	Infection ward(9-3)	2018-09-10	2018-09-19	9	178/69	60								视物模糊		1								1			1		1		1		1		1						6	63.3	24.7
786	6	male	24	complete	1.AIDS 2.cryptococcal meningitis	1.AIDS2.cryptococcal meningitis3.幻听4.EB virus infection 5....	Infection ward(9-3)	2018-09-10	2018-09-19	9
787	2	male	43		1.Lungs病灶 fungus ？tuberculosis？	1.Pulmonary cryptococcosis	Infection ward(6A-8)	2018-09-10	2018-09-13	3	164/70	30					1	1				1									1		1		1		1		1		1						4.9	64	24.7
788	55	male	61	complete	1.fever of unknown origin infection ？免疫？tumor？2.pulmonary infection 3.胸腔积液	3.cryptococcosis4.左室舒张功能减退5.肝内钙化点6.肾囊肿7.Prostatic hyperplasia	Infection ward(6A-12)	2018-09-11	2018-09-17	6	168/64	12	1				1			胸痛		1									1		1		1		1		1		1						8.4	86.1	10.1
789	33	male	30		1.右Pulmonary nodule cryptococcosis？	1.Pulmonary cryptococcosis	Respiratory Internal Medicine Ward(2-14)	2018-09-13	2018-09-18	5	165/74	20										1							胃溃疡		1		1		1		1		1		1		200				5	63.3	29.7
790	35	male	45	complete	1.cryptococcal meningitis 2.脓毒血症 new type Cryptococcus	1.cryptococcal meningitis2.脓毒血症3.脑积水	Neurosurgery ward(5-8A)	2018-09-14	2018-10-08	24	163/50	30	1	1							1										1		1	1			1		1		1		400	160	1.28	119.5	10	81.4	6.9
791	38	male	56	complete	1.Hepatitis B cirrhosis 2.Chronic viral hepatitis B 3.胸腔积液	1.cryptococcal meningitis2.Hepatitis B cirrhosis3.Chronic viral hepatitis B4.胸腔积液	Infection ward(6A-9)	2018-09-19	2018-10-12	23	168/79	20		1							1								hepatitis B		1		1	1			1		1		1		350	320	1.4	111	4.4	71.9	17.9
792	27	female	62	complete	1.fever of unknown origin 2.右眼球摘除 postoperative 3.天疱疮	1.Central infection2.天疱疮3.胆囊结石伴 chronic 性胆囊炎4.皮肤撕脱伤5.间质性...	Infection ward(6A-11)	2018-09-20	2018-10-09	19	150/42	30	1	1			1						1						天疱疮		1		1	1		1		1			1		90	10	2.6	111	7.1	57.4	32.3
793	6	male	38	in progress	1.Lungs病灶 tuberculosis？ fungus ？2.hepatitis B Virus carrying 者 3. renal insufficiency ...	1.Pulmonary cryptococcosis2.hepatitis B Virus carrying 者3.肾结石4.肾囊肿5. renal insufficiency	Respiratory Internal Medicine Ward(2-14)	2018-09-25	2018-10-04	9	169/60	150					1						1（空洞）		1				hepatitis B		1		1		1		1		1				100	3	3	120	4.7	59.3	33.3
794	50	female	65		1.nephrotic syndrome 2.膜性肾病（II phase ） 3.chronic kidney disease4 phase ...	1.nephrotic syndrome2.膜性肾病3.chronic kidney disease3 phase 4.肾性贫血5.cryptococcosis6...	Kidney Disease WardSecond Ward(6B-9)	2018-09-28	2018-10-23	25	160/51.8	30				1						1							nephrotic syndrome+高血压		1		1		1	1		1		1			80	0	4.7	138	4.1	78.8	11.7
795	3	female	55	complete	1.cryptococcal meningitis 2.贫血	1.cryptococcal meningitis2.贫血	Infection ward(6A-10)	2018-10-05	2018-10-26	21	165/52	30	1	1		1						1									1		1	1			1		1		1		220	20	0.2	118	6.8	82.8	8.3
796	51	female	45	complete	1.Headache to be investigated 2.renal transplant state 3. Transplanted kidney dysfunction 4.hypertension...	1.Disseminated cryptococcosis2.renal transplant state3. Transplanted kidney dysfunction 4.renal hypertension5.肾...	Infection ward(6A-6)	2018-10-15	2018-10-30	15	150/39	30		1		1	1						1（空洞）					renal transplant			1		1	1		1		1		1			50	350	4	132	7.3	66	25.3
797	20	male	70	complete	1.AIDS 2.cryptococcal meningitis 3.pulmonary infection	1.AIDS2.cryptococcal meningitis3.pulmonary infection4.Pulmonary nodule5.前...	Infection ward(9-3)	2018-10-15	2018-10-18	3
798	38	female	68	complete	1.Headache to be investigated intracranial infection Consider first	1.cryptococcal meningitis	Infection ward(6A-9)	2018-10-16	2018-11-02	17	155/60	7	1	1		1							1	1					sarcoidosis、高血压		1		1	1		1		1			1		350	200	4.4	125	8.7	67.5	24.7
799	26	male	54		1.Pulmonary cryptococcosis 2.cerebral infarction 3.syphilis neurosyphilis4. anxiety state ...	1.Pulmonary cryptococcosis2.pulmonary infection3.cerebral infarction4.syphilis5. anxiety state 6.fatty liver7....	medical ward(10-3)	2018-10-17	2018-10-30	13
800	16	female	70	complete	1.lung cancer 左肺腺癌伴两肺、脑、纵隔及锁骨上 lymph node转移，cT4...	1.lung cancer2. Brain metastasis tumor3.Pulmonary cryptococcosis4. pericardial effusion 5.高甘油三酯血症	Respiratory Internal Medicine Ward(2-16)	2018-10-19	2018-11-01	13	155/58	30					1					1				lung cancer					1		1		1		1		1		1						9	46.8	40
801	7	male	32	complete	1.cryptococcal meningitis 3.Sepsis Cryptococcus 4.口腔念珠菌 infection 5...	1.AIDS2.cryptococcal meningitis3.抑郁症4.pulmonary infection5.血...	Infection ward(9-3)	2018-10-19	2018-11-15	27	176/76	15	1	1		1					1								抑郁症	1			1	1			1		1		1		400	8	3.5	114	5.9	86.8	7.4
802	31	male	49	complete	1.fever of unknown origin 2.cryptococcal meningitis 3. cerebral infarction	1.cryptococcal meningitis2.腰椎穿刺 postoperative 3. cerebral infarction 4.两侧基底节区、右侧桥脑...	Infection ward(6A-9)	2018-10-29	2018-11-09	11	165/卧床	15	1	1					1		1										1		1	1			1		1		1		305	500	0.7	100	10.2	83.3	9.6
803	2	male	64	complete	1.nephrotic syndrome 2.Pulmonary cryptococcosis 3.Prostatic hyperplasia 4. herpes zoster...	1.nephrotic syndrome2.chronic kidney disease-III phase 3.Pulmonary cryptococcosis4.Prostatic hyperplasia5....	Kidney Disease Ward oneward(6B-8)	2018-10-29	2018-11-06	8
804	11	male	39		1.pulmonary infection	1.Cryptococcal pneumonia2.右侧锁骨上 lymph node探及	Respiratory Internal Medicine Ward(2-14)	2018-10-31	2018-11-06	6	168/66	15					1					1									1		1		1		1		1		1						5.7	68.1	25.1
805	1	male	27		1.cryptococcal meningitis	1.AIDS2.cryptococcal meningitis3.cerebral hernia4.pulmonary infection5.胸腔...	negative pressure ward(9-5)	2018-10-31	2018-11-19	19	174/65	5	1	1			1		1				1							1			1	1			1		1		1	1	400	0	1.3	122	3.1	85.4	10.5
806	15	male	24	complete	1.AIDS 2.cryptococcal meningitis V-P分流 postoperative ...	1.AIDS2.cryptococcal meningitis3.hypokalemia4.中度贫血5....	Infection ward(9-3)	2018-11-01	2018-11-16	15
807	27	female	53		1.Pulmonary nodule Cryptococcal Consider first2.血小板减少性紫癜	1.Pulmonary cryptococcosis2.血小板减少性紫癜	Respiratory Internal Medicine Ward(2-16)	2018-11-02	2018-11-08	6	156/45	90					1					1							ITP		1		1		1	1		1			1						6.7	72.2	21.4
808	9	female	24		1.intracranial infection 2.Cryptococcal encephalitis	1.cryptococcal meningitis2.pulmonary infection	Infection ward(6A-10)	2018-11-03	2018-11-22	19	165/52	5	1	1								1（空洞）									1		1	1			1		1		1		290	20	3.5	124	9.3	92.4	1.1
809	20	female	35	complete	1.cryptococcal meningitis	1.cryptococcal meningitis2. Liver function damage 3.脑室扩张4.thyroid node 5.高甘油三...	Infection ward(6A-10)	2018-11-04	2018-11-28	24	150/49.5	10		1							1										1		1	1			1		1		1		90	30	1.2	122	6.5	74.9	17.8
810	7	female	30	complete	1.meningitis infectious？免疫性？2.thyroid node	1.cryptococcal meningitis2.thyroid node 3.肾结石4.子宫肌瘤	Infection ward(6A-12)	2018-11-07	2018-11-30	23	160/45	30	1	1							1										1		1	1			1		1		1		＞400	13	0.89	130	5.9	58.5	34.8
811	28	female	61		1.胆囊结石 2.骨髓增生异常综合征 3.cryptococcosis	1.胆囊结石2.骨髓增生异常综合征3.cryptococcosis	Hepatobiliary Pancreatic Surgery Center Nineward(6B-18)	2018-11-09	2018-11-17	8
812	11	male	50		1.Lungs阴影 inflammation ？tumor？tuberculosis？	1.Cryptococcal pneumonia2.fatty liver3.肾囊肿4.Prostatic hyperplasia	Respiratory Internal Medicine Ward(2-14)	2018-11-12	2018-11-19	7	168/70	60					1			背痛			1								1		1		1		1		1		1						6.6	70.2	12
813	2	male	72	complete	1.diabetes酮症 2.pulmonary infection 3.hypertension	1.pulmonary tuberculosis2.Pulmonary cryptococcosis3.type 2 diabetes性周围血管病变4.hypertension 5.糖...	Infection ward(9-4)	2018-11-12	2018-12-07	25	168/70	14	1										1	1	1				高血压		1		1		1		1		1		1						18.6	76.2	14.6
814	-6	male	47	complete	1.pulmonary infection	1.pulmonary infection2.声带白斑3.Pulmonary cryptococcosis4.肾囊肿	Infection ward(6A-12)	2018-11-12	2018-11-23	11
815	8	male	34	complete	1.AIDS 2.抽搐 yet to be investigated 继发性癫痫 Consider first3...	1.AIDS2.癫痫3.cryptococcal meningitis4.Tuberculous meningitis5....	Infection ward(9-3)	2018-11-13	2019-01-01	49
816	-3	female	27	complete	1.cryptococcal meningitis	1.cryptococcal meningitis	Infection ward(6A-9)	2018-11-13	2018-11-19	6	175/66.5	15		1		1							1						血小板减少性紫癜		1		1	1		1		1			1		180	100	3.4	124	5.8	88.8	4.6
817	23	male	48		1.fever of unknown origin infectious？免疫性？neoplastic？2.chronic kidney disease5 phase 3...	1.cryptococcal meningitis2. chronic 性肾小球肾炎3.chronic kidney disease5 phase 4.移植肾功能不...	renal transplantward(6B-7)	2018-11-19	2018-11-26	7	172/64	180	1										1					renal transplant			1		1	1		1		1		1			210	160	3.3	119	9.5	60.6	30.6
818	50	male	24	complete	1.fever of unknown origin infectious？免疫性？neoplastic？2.nephrotic syndrome	1.Disseminated cryptococcosis2.nephrotic syndrome3.cryptococcal meningitis4.Pulmonary cryptococcosis5.菌...	Infection ward(6A-6)	2018-11-21	2018-12-04	13	170/59	10	1	1							1								nephrotic syndrome		1		1	1		1		1			1		230	70	0.6	110	11.6	72.6	17.9
819	20	male	51	complete	1.肺cryptococcosis 2.胸腔积液 右侧3.右Lungs分切除 postoperative 4...	1.肺cryptococcosis2.胸腔积液3.右Lungs分切除 postoperative 4.hypertension 5.diabetes...	Infection ward(6A-8)	2018-11-23	2018-11-30	7	160/62	30											1	1					高血压		1		1		1		1		1		1		160	5	3.3	129	6	59.1	32.1
820	60	female	62	complete	1.cryptococcal meningitis 2.再生障碍性贫血	1.cryptococcal meningitis2. disturbance of consciousness 3.再生障碍性贫血4. renal insufficiency 5.高钠...	Infection ward(6A-12)	2018-11-28	2018-12-04	6	154/39	60	1	1					1		1								再障		1		1	1			1		1		1		380	8	1.25	114.9	5.1	95.5	4.1
821	12	female	49		1.头痛 yet to be investigated2.cryptococcosis 疑似	1.cryptococcal meningitis2. rheumatoid arthritis 3.肾结石4.thyroid node	Infection ward(6A-10)	2018-11-28	2018-12-07	9	159/50	90		1		1					1								Rheumatoid Arthritis		1		1	1		1		1		1			250	85	1.8	121	4.7	68.8	20.8
822	38	male	58	complete	1.cryptococcal meningitis 2.hypokalemia 3. abnormal liver function 4.hypertension...	1.cryptococcal meningitis2.hypokalemia3. abnormal liver function 4.hypertension2 level 5.thyroid术...	Infection ward(6A-11)	2018-11-29	2018-12-25	26	168/58	50		1						听力下降	1								高血压		1		1	1			1		1		1	1	340	50	0.1	108	8	84.1	8.5
823	3	female	53	complete	1.Pulmonary cryptococcosis 2.肋骨骨折	1.Pulmonary cryptococcosis2.肝钙化灶3.子宫肌瘤4.胸腔积液5.肺萎陷6.右肺下...	Infection ward(6A-9)	2018-11-30	2018-12-06	6	160/60	14								1		1							高血压		1		0		1		1		1		1		153	0	3.4	128	6	71.2	17.7
824	55	male	39		1.Pulmonary cryptococcosis	1.Pulmonary cryptococcosis	Respiratory Internal Medicine Ward(2-16)	2018-12-01	2018-12-05	4	171/70	30					1					1									1		1		1		1		1		1		135	0	3.4	125	5.7	57.5	34.9
825	20	female	48		1.重症 pneumonia 2.右侧胸腔积液 脓胸 consider 3.右Pulmonary cryptococcosis 4...	1. pneumonia2.脓气胸3.Pulmonary cryptococcosis4.type 2 diabetes5.hypokalemia6.低蛋白血...	Respiratory Internal Medicine Ward(2-14)	2018-12-03	2018-12-12	9	158/60	30	1				1	1		咯血			1（空洞）	1							1		1		1		1		1		1						9.8	75.8	16.2
826	19	male	53	complete	1.fever of unknown origin infectious？免疫性？neoplastic？2.胸闷 yet to be investigated viral心...	2.心肌炎3.pulmonary infection6.皮疹7.肺cryptococcosis10.心律失常11.心源...	Infection ward(6A-6)	2018-12-05	2018-12-22	17
827	6	male	53		1.Pulmonary cryptococcosis 2.肺叶切除 postoperative 3.type 2 diabetes 4.阑尾切...	1.Pulmonary cryptococcosis2.肺叶切除 postoperative 3.type 2 diabetes4.阑尾切除 postoperative	Infection ward(6A-11)	2018-12-10	2018-12-11	1	160/49	365											1（空洞）	1							1		1		1		1		1		1		117	2	4.9	111	5.8	70.1	16.7
828	30	male	56	complete	1.tumor标志物升高 铁蛋白升高 yet to be investigated2.fatty liver 3. chronic 性萎缩性...	1.Pulmonary cryptococcosis2. chronic 性萎缩性胃炎3.fatty liver4.糜烂性胃炎5.十二指肠球...	Infection ward(6A-12)	2018-12-10	2018-12-17	7	171/73	20								1		1									1		1		1		1		1		1		150	1	4.4	126	4.6	47.7	38.7
829	5	male	52	complete	1.pulmonary tuberculosis initial treatment、涂+2.viral hepatitis丙 type 3.type 2 diabetes	1.pulmonary tuberculosis2.viral hepatitis丙 type 3.type 2 diabetes4.肺cryptococcosis5.Liver function impairment...	Infection ward(9-4)	2018-12-11	2018-12-25	14	165/65	30	1				1						1	1	1						1		1		1		1		1		1						6.2	46.2	34.4
830	3	male	64	complete		1.Pulmonary cryptococcosis2.renal transplant postoperative 3.脑tumor切除 postoperative	Infection ward(6A-8)	2018-12-12	2018-12-13	1	175/71	10										1						renal transplant			1		0		1			1			1		170	0	3.7	124	4.5	63.1	23.9
831	29	female	58	complete	1.cryptococcal meningitis 2.急性cerebral infarction 3. rheumatoid arthritis	1.cryptococcal meningitis2.急性cerebral infarction3.rheumatoid arthritis4.肝钙化灶5.Lungs感...	Infection ward(6A-9)	2018-12-13	2018-12-26	13	158/55	15	1	1		1							1						Rheumatoid Arthritis		1		1	1		1		1			1		205	30	1.1	114	5.7	85.7	9
832	2	female	58	complete	1.系统性血管炎 2.Pulmonary cryptococcosis 3. cerebral infarction 4.骨质疏松 ...	1.系统性血管炎2.Pulmonary cryptococcosis3.nature of lung lesions to yet to be investigated4. cerebral infarction 5.骨质疏...	Infection ward(6A-9)	2018-12-17	2018-12-20	3
833	28	female	70	complete	1.腹痛 yet to be investigated 2.食管炎 霉菌性3. chronic 性非萎缩性胃炎 4.类...	2.重症 pneumonia3. rheumatoid arthritis 4.肺占位5. chronic 性非萎缩性胃炎6.腰椎压...	Infection ward(6A-12)	2018-12-18	2018-12-24	6	160/61	10								腹痛			1	1					Rheumatoid Arthritis		1		1		1	1		1		1			100	0	2.6	124	6.1	82.1	10.2
834	3	male	25	complete	1.AIDS 初筛阳性2.急性 respiratory failure PCP感...	1.AIDS2.重症 pneumonia3.cryptococcosis4.giant cell virus infection 5....	Infection ward(9-3)	2018-12-18	2019-01-07	20	168/67	10						1					1							1			1		1		1		1		1						7.4	79.4	13
835	31	male	55	complete	1.fever of unknown origin infectious？免疫性？neoplastic？2.强直性脊柱炎 3....	1.cryptococcosis2.强直性脊柱炎3.hypertension 4.EB virus infection 5.thyroid node ...	Infection ward(6A-12)	2018-12-21	2018-12-28	7	172/72.5	640	1									1							强直性脊柱炎		1		1		1	1		1			1		195	0	3.5	126	11.2	60.6	27.8
836	18	male	56	complete	1.Central infection Cryptococcal meningoencephalitis	1.昏迷2.cerebral hernia3.Cryptococcal encephalitis4.脑缺血性改变6.强直性脊柱炎7.肺...	Infection ward(6A-6)	2018-12-24	2019-01-31	38	165/60	20	1	1		1						1							强制性脊柱炎		1		1	1			1		1		1	1	400	10	0.05	121	9.6	79.5	6.2
837	17	female	42	in progress	1.fever of unknown origin infection ？tumor？风湿免疫？2.子宫内膜异位症 3....	1.盆腔 inflammation 性疾病2.left 卵巢输卵管脓肿3.盆腔子宫内膜异位症4.盆腔...	Infection ward(6A-11)	2018-12-27	2019-01-14	18	155/48	30										1							输卵管脓肿		1		1		1		1		1		1		100	3	3.8	111	10.4	81.3	13.4
838	9	male	25	complete	1.AIDS 2.cryptococcal meningitis	1.AIDS2.cryptococcal meningitis3. pneumonia4.thyroid node 5.肝...	Infection ward(9-3)	2018-12-28	2019-01-21	24	178/77.5	5	1	1					1			1							syphilis	1			1	1			1		1		1	1	115	80	3.15	123	6.1	76.6	14.7
839	3	male	22	in progress	1.pulmonary infection bacterial？ Cryptococcus 2.肺栓塞	1.Pulmonary cryptococcosis2.肺栓塞3.thyroid node 4.窦性心动过速	Infection ward(6A-11)	2019-01-03	2019-01-15	12	183/57.5	20	1				1	1					1						allergic purpura		1		1		1		1		1				118	0	3.1	113	5	54.1	29.5
840	23	female	55		1.肺占位性病变 cryptococcosis?pulmonary tuberculosis？lung cancer?2.thyroid切除术...	1.Cryptococcal pneumonia2.thyroid切除 postoperative	Respiratory Internal Medicine Ward(2-14)	2019-01-04	2019-01-10	6	158/55	14								无症状		1									1		1		1		1		1		1		102	0	2.7	119	4.8	54.5	38
841	9	male	54	complete	1.AIDS 初筛阳性2.pulmonary infection 3.hypertension2...	1.AIDS2.cryptococcal meningitis3.pulmonary infection4.Bilateral 胸腔积液...	Infection ward(9-3)	2019-01-05	2019-02-03	29	171/75	2	1	1									1						帕金森、高血压	1			1	1			1		1		1		140	10	3.3	108	4.4	72.6	21.7
842	5	male	63	complete	1.AIDS 2. new type Cryptococcus Sepsis 3.肺 Cryptococcus ...	1.多器官功能衰竭2.infectious休克3.肺cryptococcosis4.cryptococcal meningitis5....	Infection ward(9-3)	2019-01-10	2019-02-27	48	158/卧床	30	1	1		1							1							1			1	1			1		1		1	1	250	0	2.1	110	5.5	88	5.3
843	31	male	77	complete	1.cryptococcal meningitis encephalitis2. cerebral infarction 3.脑动脉狭窄 4.药物...	1.Cryptococcal encephalitis2.cryptococcal meningitis3.Sepsis4. cerebral infarction 5.脑动脉狭窄6...	Infection ward(6A-12)	2019-01-13	2019-01-25	12	159/49	40		1		1			1			1							高血压		1		1	1			1		1		1	1	350	75	0.31	118	8.2	80.7	10.7
844	55	male	53	complete	1.肺占位 2.renal transplant postoperative 3.thyroid功能减退 4.hypertension ...	1.cryptococcosis2.renal transplant postoperative 3.thyroid功能减退4.心脏瓣膜病5.间质性肺...	Infection ward(6A-12)	2019-01-18	2019-01-29	11	172/71	30					1	1					1	1				renal transplant			1		1		1		1		1	1			110	0	5.7	131	6.3	65.4	24.5
845	31	male	71		1.nephrotic syndrome 2.膜性肾病（II phase ） 3.chronic kidney disease-III...	1. chronic 性 renal insufficiency 急性加重2.膜性肾病（II phase ）3.chronic kidney disease-III ...	Kidney Disease Ward oneward(6B-8)	2019-01-18	2019-01-29	11	163/62.2	3					1						1					renal transplant			1		1		1	1		1		1			180	5	5.5	125	7.1	66.8	20.2
846	52	male	65	complete	1.cryptococcal meningitis 2.Pulmonary cryptococcosis Wait to confirm3.hypertension 3 level 4...	1.cryptococcal meningitis2.Pulmonary nodule3.hypertension3 level 4.maxillary sinusitis5.thyroid node 6...	Infection ward(6A-6)	2019-01-25	2019-02-21	27	165/70	30	1	1		1							1					角膜移植	高血压		1		1	1			1		1				310	220	0.2	104	7.8	89	7.5
847	50	female	46		1.肺cryptococcosis	1.肺cryptococcosis2.thyroid node	Respiratory Internal Medicine Ward(2-14)	2019-01-28	2019-02-12	15	160/65	150											1								1		1		1		1		1				130	0	3.2	124	8.3	66.1	26.1
848	62	male	48	complete	1. Liver function damage 2.Pulmonary nodule cryptococcosis Consider first3.肝占位性病...	1.Pulmonary cryptococcosis2.胆总管结石3.肝占位性病变4. Liver function damage 5.fatty liver6...	Infection ward(6A-12)	2019-01-29	2019-02-18	20	165/65	200		1								1									1		1		1		1		1				150	25	3.6	129	6.1	68.9	20.8
849	1	female	37		1.pulmonary infection fungus Consider first2. chronic 性肾衰竭 3. Transplanted kidney dysfunction ...	1.cryptococcosis2. chronic 性肾衰竭3. Transplanted kidney dysfunction 4.chronic kidney disease4 phase 5.肾性...	renal transplantward(6B-7)	2019-01-29	2019-02-06	8	160/45	21	1	1			1	1				1（空洞）						renal transplant	hepatitis B		1		1		1	1		1					150	1	5.3	127	5.2	77.9	8.3
850	52	female	61	complete	1.intracranial infection cryptococcal meningitis？2. rheumatoid arthritis 3.多发性肌...	1.cryptococcal meningitis2. rheumatoid arthritis 3. polymyositis 4.副nasosinusitis	Infection ward(6A-11)	2019-02-02	2019-03-06	32	160/65	30		1					1			1							Rheumatoid Arthritis、 polymyositis		1		1	1		1		1					310	5	2.8	122	14.6	88.5	6.4
851	16	male	37	complete	1.nature of lung lesions to yet to be investigated Bipulmonary node 2.cryptococcal meningitis yet to be investigated	1.Pulmonary cryptococcosis2.maxillary sinusitis	Infection ward(6A-6)	2019-02-11	2019-02-14	3	167/58	20		1									1								1		1		1		1		1				340	1	3.5	129	5.8	62	26.7
852	-5	male	65		1. abnormal liver function drug-induced？2.肺cryptococcosis 3. cerebral infarction 4.高...	1.Drug induced liver damage害2.肺cryptococcosis3.cryptococcal meningitis4. cerebral infarction 5.hypertension...	Infection ward(6A-10)	2019-02-12	2019-02-19	7	160/65	15										1							高血压、脑梗		1		1	1			1		1					1	3.4	122	7.2	65.4	20.1
853	55	male	56	complete	1.fever of unknown origin infectious？免疫性？2. chronic 性化脓性中耳炎	1.甲 type H1N1流感(重症）2. chronic 性化脓性中耳炎3.Hepatic cyst4.前列腺增...	Infection ward(6A-11)	2019-02-18	2019-03-02	12
854	12	male	62	in progress	1.cryptococcal meningitis 6.splenomegaly 7.posthepatic cirrhosisDecompensation Hepatitis B...	1.cryptococcal meningitis2.脑积水 3.posthepatic cirrhosisDecompensation4.splenomegaly5.肝性...	Infection ward(6A-11)	2019-02-25	2019-03-25	28	176/76	30		1		1			1				1			肝癌			hepatitis B、cirrhosis		1		1	1			1		1				168	78	3.4	112	10.8	91.1	3.1
855	58	male	55		1. pneumonia 2.肺多发 node	1.Pulmonary cryptococcosis	Respiratory Internal Medicine Ward(2-16)	2019-02-27	2019-03-05	6	166/77	365											1								1		1		1		1		1			0	135	2	3.6	128	5.1	70.8	22.9
856	36	female	47		1.肺脓肿 Consider first	1.肺cryptococcosis2.高甘油三酯血症3.fatty liver4.thyroid node	Respiratory Internal Medicine Ward(2-16)	2019-02-27	2019-03-12	13	165/62	30	1				1			胸痛		1									1		1		1		1		1			0	180	10	4.2	125	8.1	69.6	22.5
857	9	male	42	complete	1.Hepatitis B cirrhosis 2.食管胃底静脉曲张 ＴＩＰＳ postoperative 3. Cryptococcus ...	1.Disseminated cryptococcosis2.cryptococcal meningitis3. chronic 性肝功能衰竭4.Hepatitis B cirrhosis5...	Infection ward(6A-9)	2019-02-27	2019-03-12	13	177/59	10	1						1				1						hepatitis B、cirrhosis		1		1	1			1		1								4	33.1	44.6
858	10	male	58		1.AIDS 2.Pulmonary cryptococcosis 3.pulmonary infection 4....	1.AIDS2.Pulmonary cryptococcosis3.全身多发 lymph node肿大4.hypertension...	Infection ward(9-3)	2019-02-28	2019-03-08	8
859	17	male	74	complete	1.cryptococcal meningitis	1.cryptococcal meningitis2. abnormal liver function 4.两肺纤维增殖灶5.胆囊炎6.胆囊结...	Infection ward(6A-6)	2019-03-01	2019-03-22	21	172/66.9	30	1	1		1				1											1		1	1			1										7.1	80.2	9.3
860	17	male	32		1.AIDS 2.pulmonary infection pcp？	1.AIDS2.syphilis3.pulmonary infection4.肺大泡5.贫血6.高脂...	Infection ward(9-3)	2019-03-05	2019-04-02	28	165/50.5	4	1				1						1							1			1	1			1										7	76.6	13.5
861	2	male	31		1.AIDS 2.fever of unknown origin	1.AIDS2.cryptococcal meningitis3.Sepsis4.hypokalemia5.尖...	Infection ward(9-3)	2019-03-07	2019-04-04	28	178/67	21	1	1								1							hepatitis B	1			1	1			1										3.9	77.2	7.2
862	51	male	70		1.支气管扩张伴 infection 2.hypertension 3.diabetes	1.肺cryptococcosis2.支气管扩张伴 infection 3.hypertension 4.diabetes5.冠状动脉...	Respiratory Internal Medicine Ward(2-16)	2019-03-11	2019-03-19	8	170/81.5	14	1				1	1					1	1					高血压		1		1		1		1										7.7	72	22.3
863	31	male	75	complete	1.Headache to be investigated 2.hypertension	1.cryptococcal meningitis2.hypertension 3.腰椎穿刺 postoperative 4.肺气肿5.支气管 pneumonia...	Infection ward(6A-9)	2019-03-14	2019-03-25	11	165/51	15	1	1		1	1					1							高血压		1		1	1			1										5	70	17
864	52	male	59	complete	1.fever of unknown origin 2.pulmonary infection 3.thyroid node 4.Hepatic cyst 5....	1.Sepsis2.cryptococcal meningitis3.pulmonary infection4.thyroid node 5.Hepatic cyst6.糖...	Infection ward(6A-9)	2019-03-21	2019-04-08	18	176/85	6	1				1					1		1							1		0	1			1										8.7	64.2	30.9
865	16	male	70	complete	1.pulmonary tuberculosis smear positive，initial treatment2. rheumatoid arthritis 3. chronic 性阻塞性肺病...	1.pulmonary tuberculosis2.Pulmonary cryptococcosis3. rheumatoid arthritis 4. chronic 性阻塞性肺病	Infection ward(9-4)	2019-03-22	2019-04-15	24	165/50.5	60					1						1（空洞）		1						1		1		1		1										10.2	83.6	7.1
866	55	male	65	complete	1.cryptococcal meningitis 2.Hepatitis B cirrhosis Decompensation3.After splenectomy ...	1.cryptococcal meningitis2.Pulmonary nodule3.Hepatitis B cirrhosis4.肝性脑病5.After splenectomy6...	Infection ward(6A-6)	2019-03-25	2019-04-23	29	172/66.5	30	1	1			1				1								hepatitis B		1		1	1			1										4.4	41	38.8
867	9	female	77	complete	1.fever of unknown origin 2. rheumatoid arthritis 3.全身性骨关节炎 4.高...	1.肺cryptococcosis2. rheumatoid arthritis 3.全身性骨关节炎4.hypertension 5.高...	Infection ward(6A-9)	2019-03-28	2019-04-04	7	152/50	30	1										1	1					Rheumatoid Arthritis		1		1		1		1										9.7	80.3	8.9
868	16	male	35		1.Pulmonary cryptococcosis	1.Pulmonary cryptococcosis	Respiratory Internal Medicine Ward(2-14)	2019-04-01	2019-04-02	1	175/72	7					1						1								1		1		1		1										6.3	47.2	45.2
869	30	male	61	complete	1.intracranial infection 2.cryptococcal meningitis 3.chronic kidney disease-I phase 4....	1.intracranial infection2.cryptococcal meningitis3.chronic kidney disease-I phase 4.腰椎穿刺 postoperative 5....	Infection ward(6A-9)	2019-04-03	2019-04-18	15	178/63	14	1			1					1								膜性肾病		1		1	1		1											8.3	62.7	30
870	39	female	47		1.Lungs阴影 tuberculosis？ infection ？tumor？2.Hepatic cyst 3.hepatitis B表面抗原...	1.Pulmonary cryptococcosis2.尿路 infection 3.肾结石4.肾囊肿5.Hepatic cyst6.hepatitis B表面抗...	Respiratory Internal Medicine Ward(2-14)	2019-04-04	2019-04-15	11	159/55	60					1					1（空洞）							hepatitis B		1		1		1		1										6.6	57.6	32.2
871	27	female	66	complete	1.cryptococcal meningitis 2.脑干梗死 3.hypertension 4.2 type 糖尿...	1.cryptococcal meningitis2. chronic 性肾炎综合征3.混合性结缔组织病4.脑干梗死5...	Infection ward(6A-9)	2019-04-04	2019-04-22	18	152/50	14	1			1			1		1			1					chronic 性肾脏病史、混合性结缔组织病		1		1	1		1											19.6	92.8	2.3
872	5	male	28		1.人类免疫缺陷病毒[HlV]实验室证据 infection 待确认2.Lungs...	1.AIDS2.pulmonary infection3.cryptococcosis4.支气管病变5.splenomegaly...	Infection ward(9-3)	2019-04-06	2019-04-16	10	170/56	30	1				1	1					1							1			1		1		1										3.5	55.9	32
873	12	male	67	complete	1.Cryptococcal encephalitis 2.帕金森综合征 4.Prostatic hyperplasia 5. chronic 性...	1.Cryptococcal encephalitis2.帕金森综合征4.Prostatic hyperplasia5. chronic 性胃炎6.贫血	Infection ward(6A-9)	2019-04-11	2019-04-18	7	卧床	60	1						1				1						帕金森		1		1	1			1										5	77.2	13.7
874	15	female	68	complete	1.intracranial infection tuberculosis ？fungous？ autoimmune ？2.pulmonary infection tuberculosis...	1.Tuberculous meningitis2.pulmonary tuberculosis3.Pulmonary cryptococcosis4. rheumatoid arthritis	Infection ward(9-4)	2019-04-14	2019-05-16	32	155/59	5		1					1				1（空洞）		1				Rheumatoid Arthritis		1		1		1	1											8.1	77	14.4
875	5	male	52	complete	1.pulmonary tuberculosis 2.声带肿物 3.冠状动脉粥样硬化性心脏病 4....	1.pulmonary tuberculosis2.皮肤cryptococcosis3.声带肿物4.冠状动脉粥样硬化性心脏病5....	Infection ward(9-4)	2019-04-16	2019-04-25	9	160/51	60					声嘶						1		1		免疫性 Hemolysis 贫血		hepatitis B		1		0		1	1											6.1	85	6.8
876	10	male	25	complete	1.AIDS 2.Sepsis new 生 Cryptococcus 3. cryptococcal ...	1.Sepsis2.cryptococcal meningitis3.pulmonary infection4.AIDS5.血...	Infection ward(9-3)	2019-04-17	2019-05-15	28	174/46.5	14	0	1		1	1						1（空洞）							1			1	1			1										8.7	84	10
877	38	male	55		1.Lungs阴影 cryptococcosis Consider first2.哮喘	1.Pulmonary cryptococcosis2.哮喘	Respiratory Internal Medicine Ward(2-14)	2019-04-18	2019-04-25	7	173/70	180					1					1							哮喘		1		1		1		1										4.8	49.9	36
878	17	male	45	in progress		1.Pulmonary cryptococcosis2.肺脓肿3.renal transplant state4.hypertension3 level 5.diabetes6.甲状...	Respiratory Internal Medicine Ward(2-14)	2019-05-06	2019-05-06	1	165/65	15	0	0	0	0	0	0	0		0		1（空洞）					renal transplant			1		1		1		1										7.1	69.9	20.3
879	7	male	35	complete	1.Headache to be investigated cryptococcal meningitis Consider first	1.Disseminated cryptococcosis2.cryptococcal meningitis3.Pulmonary cryptococcosis4.副nasosinusitis	Infection ward(6A-10)	2019-05-07	2019-05-22	15	170/62	5	1	1		1					1										1		1	1			1										8.4	78.6	13
880	23	male	56	in progress	1.Pulmonary cryptococcosis 2.Cryptococcal encephalitis 3.hypertension 4.thyroid结...	1.Cryptococcal encephalitis2.cryptococcal meningitis3.Pulmonary cryptococcosis4.hypertension 5.thyroid...	Infection ward(6A-6)	2019-05-10	2019-05-20	10	166/60	60	1	1								1							高血压		1		1	1			1										10.5	75.1	16.4
881	21	female	55	complete	2.Pulmonary cryptococcosis 3.结肠癌根治 postoperative	1.Pulmonary cryptococcosis2.结肠癌根治 postoperative 3.Hepatic cyst4.thyroid node 5.pulmonary infection	Infection ward(6A-10)	2019-05-14	2019-05-20	6	155/55	180	0	0	0	0	0	0	0				1			结肠癌 postoperative					1		0		1		1										6.6	58.4	34.6
882	-1	male	48	complete	1.cryptococcal meningitis 2.血三系减少 3.肝功能不全	1.cryptococcal meningitis2.Cryptococcal encephalitis3.心律失常4.电解质代谢紊乱5.肝...	Infection ward(9-3)	2019-05-16	2019-05-23	7	170/48.5	30		1		1					未查									1			1	1			1										5.2	79.8	10
883	10	male	63	complete	1.cryptococcal meningitis 2.腔隙性cerebral infarction 急性3.tuberculosis 多浆膜腔...	1.cryptococcal meningitis2.顽固性hypokalemia3.腔隙性cerebral infarction4.头皮血肿5.结...	Infection ward(6A-11)	2019-05-17	2019-06-05	19	160/46	10	1	1								1							Rheumatoid Arthritis		1		1	1		1											4.1	70	21.2
884	9	female	53	complete	1.pulmonary infection 2.thyroid切除 postoperative 3.子宫肌瘤 postoperative	1.肺cryptococcosis2.右肺占位3.thyroid切除 postoperative 4.子宫肌瘤 postoperative	Infection ward(6A-10)	2019-05-27	2019-06-03	7	160/60	10					1					1									1		1		1		1										7.3	76.8	18.5
885	51	male	45	complete	1.Cryptococcal encephalitis 2.cryptococcal meningitis 3.Pulmonary cryptococcosis consider 4...	1.Disseminated cryptococcosis2.cryptococcal meningitis3.Pulmonary cryptococcosis4.Sepsis5.肝功能...	Infection ward(6A-8)	2019-05-31	2019-06-27	27	175/60	10	1			1							1（空洞）								1		1	1			1										8.2	85.9	6
886	11	male	61		1.AIDS 2.cryptococcosis	1.AIDS2.cryptococcosis3.EB virus infection 4.高脂血症5.脂...	Infection ward(9-3)	2019-06-04	2019-06-11	7
887	27	male	51	complete	1.两Pulmonary nodule tumor Consider first2.upper respiratory tract infection 3.thyroid node ...	1.肺cryptococcosis2.两Pulmonary nodule3.upper respiratory tract infection4.thyroid node 5.fatty liver	medical ward(10-3)	2019-06-06	2019-06-17	11	165/75	10	0	0	0	0	0	0	0				1								1		未测		1		1										9.6	73.6	20.7
888	5	male	54	complete	1.脊髓蛛网膜炎 2.尿潴留 3.nephrotic syndrome 4.低蛋白血症...	1.cryptococcal meningitis2.脊髓蛛网膜炎3.尿潴留4.nephrotic syndrome5.低蛋白血...	Infection ward(6A-10)	2019-06-11	2019-06-26	15	170/80	30	1	1								1		1					肾病综合症		1		1	1		1											16.7	64.3	29.3
889	59	male	60	in progress	1.renal transplant state 2.肾功能异常 3.皮肤软组织 infection 4.高血...	1.renal transplant state2. Renal transplant failure 3.cryptococcal meningitis4.皮肤软组织 infection 5.高...	renal transplantward(6B-7)	2019-06-13	2019-07-25	42	168/64.1	30	1			1						1		1				renal transplant			1		1	1		1											3.9	86.3	10.3
890	15	male	29	complete	1.AIDS 2.cryptococcal meningitis 3. abnormal liver function ...	1.AIDS2.cryptococcal meningitis3.pulmonary infection4.支气管炎5....	Infection ward(9-3)	2019-06-21	2019-07-04	13	173/62	30	1	1		1	1					1								1			1	1			1										5.6	83.1	9.8
891	3	male	20	complete	1.intracranial infection cryptococcal meningitis consider	1.Sepsis2.cryptococcal meningitis3.肺cryptococcosis	Infection ward(6A-8)	2019-06-27	2019-07-25	28	163.5/52	30	1	1								1			1						1		1	1			1										6.8	62.7	23.9
892	2	male	52	complete	1.AIDS 2.Pulmonary nodule 右肺上叶，tumor Consider first...	1.Pulmonary nodule2.Pulmonary cryptococcosis3.AIDS4.type 2 diabetes5.口腔...	Infection ward(9-3)	2019-07-01	2019-07-08	7	160/53	180										1		1						1			1		1		1										5.9	57	29.3
893	38	female	63	complete	1.pulmonary infection cryptococcosis？bacterial？	1.Pulmonary cryptococcosis2.thyroid node 3.脑缺血性改变4.胆管扩张	Infection ward(6A-11)	2019-07-03	2019-07-09	6	156/60	120					1						1								1		1		1		1										5.4	50.6	38.4
894	21	male	26	complete	1.intracranial infection cryptococcal meningitis consider 2.systemic lupus erythematosus，累及器官...	1.cryptococcal meningitis2.systemic lupus erythematosus，累及器官或系统3. pneumonia4.胆囊息...	Infection ward(6A-12)	2019-07-06	2019-07-26	20	179/64	5	1	1								1							SLE		1		1	1		1											8.4	84.8	5.3
895	38	male	54		1.Pulmonary nodule 2.肺cryptococcosis 3.耶氏肺孢子菌 pneumonia 4.高血...	1.肺cryptococcosis2.Pulmonary nodule3.hypertension 4.hepatitis B表面抗原携带者5.fatty liver...	Respiratory Internal Medicine Ward(2-14)	2019-07-08	2019-07-15	7	164/74	14		1									1						hepatitis B		1		1		1		1										6.2	61.2	32.5
896	18	male	72	complete	1.Disseminated cryptococcosis 2.chronic kidney disease5 phase 血液透析3.2 type 糖尿...	1.Disseminated cryptococcosis2.chronic kidney disease5 phase 3.type 2 diabetes伴神经并发症4.肠道...	Infection ward(6A-11)	2019-07-09	2019-07-30	21	163/62	15	1	1			1						1	1					肾病、透析		1		1		1		1										11.3	87.5	6.8
897	30	male	63		1.Pulmonary nodule tumor？ infection ？tuberculosis？	1.Pulmonary cryptococcosis2.胆石症3.Prostatic hyperplasia	Respiratory Internal Medicine Ward(2-14)	2019-07-16	2019-07-22	6	168/61	240											1								1		1		1		1										5.5	58.1	29.3
898	20	male	57	complete	1.renal transplant state 2.gout	1.renal transplant state2.gout3.肺cryptococcosis4.肾囊肿	Kidney Disease WardSecond Ward(6B-9)	2019-07-22	2019-07-29	7	162/53	3 year											1（空洞）					renal transplant			1		1		1	1											4.6	63.7	29.8
899	17	male	35	complete	1.AIDS 2.cryptococcosis 3.fatty liver 4.胆囊...	1.AIDS2.cryptococcosis3.高脂血症4.胆囊结石伴 chronic 性胆囊...	Infection ward(9-3)	2019-07-22	2019-07-30	8	170/65	12	1										1（空洞）							1			1		1		1										6.5	50	32.7
900	26	male	52		1.nature of lung lesions to yet to be investigated 2.viral hepatitis B	1.肺cryptococcosis2.Chronic viral hepatitis B	Respiratory Internal Medicine Ward(2-16)	2019-07-23	2019-08-01	9	178/69	30	0	0	0	0	0	0	0				弥漫	0	0	0	0	0	hepatitis B		1		1		1		1										5.8	61.8	31
901	23	male	79	complete	1.cryptococcal meningitis 2.hypertension Level 1 3.肾占位 右侧	1.cryptococcal meningitis2.肾占位3.hypertension 4.Prostatic hyperplasia5.thyroid node 6...	Infection ward(6A-9)	2019-07-30	2019-08-08	9	165/49	30		1					1				1			1			syphilis		1		0	1			1										4.6	65.2	21.6
902	11	female	62	complete	1.Pulmonary cryptococcosis postoperative	1.肺cryptococcosis2.fatty liver4.胆囊多发结石伴胆囊炎5.thyroid node 6.右...	Infection ward(6A-8)	2019-07-30	2019-08-01	2
903	17	male	36	complete	1.Pulmonary nodule cryptococcosis？tumor？曲霉菌 infection ？	1.Pulmonary cryptococcosis2.cryptococcal meningitis3.renal transplant postoperative 4.thyroid node	Infection ward(6A-12)	2019-08-01	2019-08-08	7	165/63.5	240	0	0	0	0	0	0	0				1					renal transplant			1		1	1		1											10.3	65.1	22.8
904	8	female	73	complete	1.fever of unknown origin 2. chronic 性支气管炎 3.hypertension Level 1	1.肺cryptococcosis2. chronic 性支气管炎3.hypertension Level 14.肾囊肿5.thyroid node ...	Infection ward(6A-11)	2019-08-01	2019-08-05	4	155/53	30	1	0	0	0	1	0	0		1								高血压		1	1			1		1										10.1	70.8	17.4
905	3	male	57		1.Lungs阴影 Cryptococcus tuberculosis？tumor？2.thyroid node Bilateral ，TI...	1.Pulmonary cryptococcosis2.thyroid node 3.胆囊结石4.fatty liver5.肾囊肿6.颈动脉...	Respiratory Internal Medicine Ward(2-14)	2019-08-01	2019-08-07	6	157/73	14	0	0	0	0	0	0	0				弥漫								1		1		1		1										6	65.9	26.9
906	2	female	59		1.Pulmonary cryptococcosis 2.右 breast cancer postoperative 3.thyroid node left ，TI...	1.Pulmonary cryptococcosis2.右乳腺癌3.thyroid node 4.颈动脉内膜毛糙增厚伴斑块形...	Respiratory Internal Medicine Ward(2-14)	2019-08-02	2019-08-05	3
907	16	male	48	complete	1.肺占位	1.Pulmonary nodule2.Pulmonary cryptococcosis3.肝移植状态4.肝癌 postoperative 5.Prostatic hyperplasia6.脾...	Infection ward(6A-12)	2019-08-05	2019-08-07	2
908	36	female	26	complete	1.乏力 yet to be investigated 结缔组织病? 血液系统疾病？2. autoimmune 溶血...	4.Cryptococcal encephalitis8.Pulmonary cryptococcosis9.systemic lupus erythematosus10. autoimmune Hemolysis ...	Rheumatic Immune Ward(2-19)	2019-08-08	2019-08-20	12	166/51	7	1	0	0	0	0	0	0				1						SLE+ autoimmune 溶血		1		1	1			1										7.8	58.5	33.3
909	16	male	70	complete	1. hyponatremia 2.cryptococcal meningitis 3. pericardial effusion 少量4.发热...	1.Sepsis2.cryptococcal meningitis3.硬膜下积液4.支气管病变5.肺气肿6....	Infection ward(6A-8)	2019-08-08	2019-09-05	28	175/55	20	1	1	0	0	0	0	0		1										1		1	1			1										8.5	85.9	4
910	9	female	72		1.Lungs阴影 tumor？ infection ？tuberculosis？2. rheumatoid arthritis 3.骨关...	1.肺cryptococcosis2.间质性肺病3. rheumatoid arthritis 4.骨关节炎5.2 type 糖...	Respiratory Internal Medicine Ward(2-14)	2019-08-08	2019-08-13	5	155/50	30	1	0	0	0	1	0	0				1	1							1		1		1		1										5.7	63.5	26.5
911	19	female	69		1.软组织疾患 left 颌下软组织tumor?软组织脓肿？下颌骨骨髓炎...	1.Pulmonary cryptococcosis2.软组织疾患3.left 下颌区脓肿4.left 下颌骨骨髓炎6....	Respiratory Internal Medicine Ward(2-14)	2019-08-13	2019-08-20	7	151/51	20	0	0	0	0	0	0	0				弥漫						风湿+gout		1		阳性		1	1											7.5	62	30.1
912	5	male	29	complete	1.AIDS 待确诊2.cryptococcal meningitis 4.呼吸...	1.cryptococcal meningitis2.脑室腹腔分流 postoperative 3.肺cryptococcosis4.获得性免疫缺...	Infection ward(9-3)	2019-08-14	2019-09-09	26	168/47.5	15	1	1									弥漫（空洞）							1			1	1			1										9.4	83.9	11.3
913	21	male	49	complete	1.renal transplant state 2.fever of unknown origin 尿路 infection ？pulmonary infection？intracranial infection？...	2.renal transplant state3.cryptococcal meningitis5. Transplanted kidney dysfunction 6.hypertension 7.2 type ...	renal transplantward(6B-7)	2019-08-15	2019-08-28	13	172/57	40	有	有	无	无	无	无	无			1		1				1	hepatitis B		1		1	1		1											7.1	83	10.3
914	60	male	44	complete	1.Hepatitis B cirrhosis 2.encephalitis infectious？Hematological disease？autoimmune？3.2...	1.cryptococcosis3.splenomegaly4.血三系减少5.肝脾周围少量积液6.Hepatitis B cirrhosis7...	Infection ward(6A-12)	2019-08-16	2019-08-21	5	165/74	10	有	有	无	无	无	无	无		无			有	无	无	无	无	hepatitis B		否		阳性	是			否										3	74.6	14.4
915	15	male	31	complete	1.Headache to be investigated 2.AIDS 3.pulmonary tuberculosis 4.卡氏...	1.cryptococcal meningitis2.AIDS3.pulmonary tuberculosis4.卡氏肺孢子菌肺...	Infection ward(9-3)	2019-08-16	2019-09-09	24	163/40	7	有	有	无	无	有	无	无				弥漫	无	有	无	无	无	无	是			阳性	是			否										4.5	52	26
916	13	male	38	complete	1.intracranial infection fungous？tuberculosis ？2.pulmonary infection 3.人类免疫缺陷...	1.cryptococcal meningitis2.HIV病3.pulmonary infection4.Hepatitis B...	Infection ward(9-3)	2019-08-17	2019-09-29	43	172/51.5	10	有	有	无	有	有	无	无				弥漫	无	无	无	无	无	无	是			阳性	是			否										2.4	44.5	29.2
917	-1	male	37	in progress	1.Headache to be investigated intracranial infection？狼疮性脑病？脑血管病变？2.系统性红...	1.fungal meningitis2.systemic lupus erythematosus，累及器官或系统3.renal hypertension4.骨...	Infection ward(6A-9)	2019-08-22	2019-09-25	34	161/60	7	有	有	无	有	无	无	无				弥漫	无	无	无	无	无	SLE		否		阳性	是		是											6.8	56.6	29.1
918	2	female	61		1.cryptococcosis Lungs？meningitis？gastrointestinal tract？2.interstitial pneumonia 3.AN...	1.cryptococcosis2.interstitial pneumonia3.ANCA associated nephritis4.steroid diabetes5....	Respiratory Internal Medicine Ward(2-14)	2019-08-26	2019-08-30	4	156/59	210	无	无	无	无	无	无	无				弥漫	有	无	无	无	无	hepatitis B+高血压		否		阳性		否	是											10.4	77.5	16
919	6	male	43	complete	2.fever of unknown origin infectious？neoplastic？3.HIV...	1.Human immunodeficiency virus specific fungal disease2.Sepsis3.hypokalemia4.cryptococcal ...	Infection ward(9-3)	2019-08-30	2019-09-19	20	169/45.5	15	有	无	无	无	有	无	无				弥漫	无	无	无	无	无	无	是			阳性	是			否										4.9	46.3	27.6
920	3	male	48		1.nature of lung lesions to yet to be investigated bacterial？tuberculosis ？fungous？	1.Pulmonary cryptococcosis	Respiratory Internal Medicine Ward(2-14)	2019-08-30	2019-09-04	5	166/65	60	无	无	无	无	有	无	无				弥漫	无	无	无	无	无	无		否		阳性		否		否										5.7	59.2	28.8
921	17	male	33	complete	1.AIDS Wait to confirm2.cryptococcal meningitis 3.口腔...	1.AIDS2.cryptococcal meningitis3.cerebellar ataxia4.卡氏肺...	Infection ward(9-3)	2019-09-03	2019-10-08	35	168/50	8	有	有	有	有	无	无	无				弥漫（Bilateral 胸腔积液）	无	无	无	无	无	无	是			阳性	是			否										4.5	75.4	10.1
922	27	male	68	in progress	1.Pulmonary cryptococcosis 2.myasthenia gravis Systemic 3.diabetes	1.pulmonary infection2.Pulmonary cryptococcosis3.myasthenia gravis4.steroid diabetes5.Ischemic brain...	Infection ward(6A-6)	2019-09-05	2019-09-09	4
923	50	female	67	complete	1.non-Hodgkin's lymphoma B-cell type，IV Phase A group 2.cryptococcal meningitis ...	1.Fungal septicemia2.cryptococcal meningitis5.non-Hodgkin's lymphoma6.aortic insufficiency...	Infection ward(6A-12)	2019-09-10	2019-09-16	6	162/53	16	有	有	无	无	无	无	无				弥漫	有	无	无	有	无	无		否		阳性	是			否										9.9	89	4
924	16	male	48	complete	1.cryptococcal meningitis 2.pulmonary infection 3.AIDS ...	1.cryptococcal meningitis2.AIDS3.pulmonary infection4.Personal history of cerebral infarction...	Infection ward(9-3)	2019-09-18	2019-10-07	19	170/55	7d	有	有	无	有	有	无	有				弥漫	无	无	无	无	无	无	是			阳性	是			否										10.6	83	10.5
925	27	female	58	complete	1.pulmonary infection 2.Diabetic nephropathy 3.chronic kidney diseasePhase 5 4.renal transplant...	1.cryptococcal meningitis2.pulmonary infection4.renal transplant status 6.maxillary sinusitis7.Diabetic nephropathy...	renal transplantward(6B-7)	2019-09-19	2019-09-30	11	164/50.7	3d	有	无	无	无	有	无	无				弥漫	有	无	无	无	renal transplant	无		否		阳性	是		是											9.4	74.3	14.6
926	18	male	63	complete	1.AIDS 2.cryptococcal meningitis 3.Hypertrophic non obstructive...	1.AIDS 2.cryptococcal meningitis3.Hypertrophic non obstructive cardiomyopathy 4....	Infection ward(9-3)	2019-09-19	2019-09-23	4
927	7	male	42	complete	1.HIV 2.central nervous system infection Cryptococcus...	1.cerebral hernia2.Human immunodeficiency virus specific fungal disease3.cachexia 5.Disseminated cryptococcosis...	Infection ward(9-3)	2019-09-23	2019-10-02	9	173cm/65kg	10d	有	有	无	有			有			局限（空洞、纵膈多发 lymph node肿大）		无	无	无	无	无	无	是			+	是			否										6.2	85	6.6
[truncated: 58 more columns]
